# Supplementary material for: Expansion of the circadian transcriptome in Brassica rapa and genome-wide diversification of paralog expression patterns
Source: eLife. 2020 Sep 30;9:e58993. doi: 10.7554/eLife.58993 (PMC7655105; doi:10.7554/eLife.58993)
Supplement: Supplementary file 1. — Coexpression modules were generated for genes in circadian conditions using two different entrainments (LD and HC). Each module was analyzed for categorical enrichment using Biological Process Gene Ontology annotations. Each tab in this file represents a different LD or HC module. The last tab, titled ‘Differential_Pattern’ represents categorical enrichment results on the list of 1713 genes that show significant pattern changes between LD and HC entrainment conditions. [file elife-58993-supp1.xlsx]

## Sheet: HC_01
	P-Value	Adj_P-Value	Fold Enrichment	Enrichment Direction	TotalInRef	AnnInRef	TotalInTest	AnnInTest	GenesWithAnn
GO:0044260 - cellular macromolecule metabolic process	1.14421e-15	3.75758e-12	0.819524	Under	11985	4217	2705	780	BraA01g01730R | BraA01g02070R | BraA01g02230R | BraA01g02320R | BraA01g02370R | BraA01g02380R | BraA01g02990R | BraA01g03020R | BraA01g04330R | BraA01g05530R | BraA01g05690R | BraA01g06400R | BraA01g06860R | BraA01g08140R | BraA01g08210R | BraA01g08360R | BraA01g08400R | BraA01g08980R | BraA01g10230R | BraA01g10340R | BraA01g10580R | BraA01g10760R | BraA01g11200R | BraA01g11460R | BraA01g12560R |…
GO:0043170 - macromolecule metabolic process	2.60388e-13	4.27557e-10	0.844957	Under	11985	4562	2705	870	BraA01g01730R | BraA01g02070R | BraA01g02230R | BraA01g02320R | BraA01g02370R | BraA01g02380R | BraA01g02990R | BraA01g03020R | BraA01g04330R | BraA01g05530R | BraA01g05690R | BraA01g06400R | BraA01g06860R | BraA01g08140R | BraA01g08210R | BraA01g08360R | BraA01g08400R | BraA01g08980R | BraA01g09740R | BraA01g10230R | BraA01g10340R | BraA01g10580R | BraA01g10760R | BraA01g11200R | BraA01g11460R |…
GO:0044710 - single-organism metabolic process	1.48794e-11	1.6288e-08	1.1951	Over	11985	3066	2705	827	BraA01g01100R | BraA01g01450R | BraA01g01580R | BraA01g02230R | BraA01g03890R | BraA01g04510R | BraA01g05540R | BraA01g05570R | BraA01g05590R | BraA01g06270R | BraA01g06380R | BraA01g06400R | BraA01g06410R | BraA01g07390R | BraA01g07500R | BraA01g07630R | BraA01g08120R | BraA01g08400R | BraA01g08710R | BraA01g09270R | BraA01g09740R | BraA01g10400R | BraA01g10450R | BraA01g10580R | BraA01g11030R |…
GO:0009699 - phenylpropanoid biosynthetic process	1.24144e-09	1.01922e-06	2.46149	Over	11985	72	2705	40	BraA01g06380R | BraA02g06190R | BraA02g11520R | BraA03g02890R | BraA03g06590R | BraA03g14120R | BraA03g16040R | BraA03g18870R | BraA03g21370R | BraA03g29420R | BraA03g50430R | BraA03g55060R | BraA03g57630R | BraA03g57830R | BraA03g59060R | BraA04g07120R | BraA04g21060R | BraA04g23370R | BraA04g25550R | BraA04g28160R | BraA05g08820R | BraA05g14100R | BraA05g16310R | BraA05g26460R | BraA05g31770R |…
GO:0016070 - RNA metabolic process	1.56419e-09	1.02736e-06	0.779266	Under	11985	1990	2705	350	BraA01g02070R | BraA01g02230R | BraA01g02370R | BraA01g02380R | BraA01g03020R | BraA01g08210R | BraA01g08360R | BraA01g08980R | BraA01g10230R | BraA01g10760R | BraA01g11200R | BraA01g12560R | BraA01g15420R | BraA01g16860R | BraA01g18240R | BraA01g18460R | BraA01g20080R | BraA01g20450R | BraA01g21850R | BraA01g22400R | BraA01g24360R | BraA01g25850R | BraA01g26210R | BraA01g27380R | BraA01g28780R |…
GO:0044267 - cellular protein metabolic process	2.42117e-09	1.32519e-06	0.790675	Under	11985	2135	2705	381	BraA01g01730R | BraA01g02320R | BraA01g02370R | BraA01g02380R | BraA01g02990R | BraA01g04330R | BraA01g05530R | BraA01g05690R | BraA01g06400R | BraA01g06860R | BraA01g08140R | BraA01g10340R | BraA01g10580R | BraA01g11200R | BraA01g11460R | BraA01g17710R | BraA01g18460R | BraA01g22260R | BraA01g22470R | BraA01g22610R | BraA01g26850R | BraA01g29170R | BraA01g31570R | BraA01g31860R | BraA01g32640R |…
GO:0019538 - protein metabolic process	3.5514e-09	1.66611e-06	0.804031	Under	11985	2342	2705	425	BraA01g01730R | BraA01g02320R | BraA01g02370R | BraA01g02380R | BraA01g02990R | BraA01g04330R | BraA01g05530R | BraA01g05690R | BraA01g06400R | BraA01g06860R | BraA01g08140R | BraA01g10340R | BraA01g10580R | BraA01g11200R | BraA01g11460R | BraA01g16850R | BraA01g17710R | BraA01g18460R | BraA01g22260R | BraA01g22470R | BraA01g22610R | BraA01g26150R | BraA01g26730R | BraA01g26850R | BraA01g28460R |…
GO:0044711 - single-organism biosynthetic process	7.34718e-09	2.72236e-06	1.27227	Over	11985	1393	2705	400	BraA01g01100R | BraA01g02230R | BraA01g03890R | BraA01g05570R | BraA01g06270R | BraA01g06380R | BraA01g06400R | BraA01g07390R | BraA01g08710R | BraA01g09270R | BraA01g09740R | BraA01g10450R | BraA01g10580R | BraA01g11030R | BraA01g13820R | BraA01g14850R | BraA01g15830R | BraA01g16230R | BraA01g23770R | BraA01g24540R | BraA01g28840R | BraA01g30000R | BraA01g30310R | BraA01g31460R | BraA01g32940R |…
GO:0010467 - gene expression	7.46081e-09	2.72236e-06	0.803246	Under	11985	2245	2705	407	BraA01g02070R | BraA01g02230R | BraA01g02370R | BraA01g02380R | BraA01g03020R | BraA01g04330R | BraA01g08210R | BraA01g08360R | BraA01g08980R | BraA01g09740R | BraA01g10230R | BraA01g10760R | BraA01g11200R | BraA01g12560R | BraA01g15420R | BraA01g16860R | BraA01g18240R | BraA01g18460R | BraA01g20080R | BraA01g20450R | BraA01g21850R | BraA01g22400R | BraA01g24360R | BraA01g25850R | BraA01g26210R |…
GO:0055114 - oxidation-reduction process	1.0631e-08	3.49121e-06	1.32437	Over	11985	1007	2705	301	BraA01g03890R | BraA01g04510R | BraA01g05540R | BraA01g05570R | BraA01g05590R | BraA01g06270R | BraA01g06380R | BraA01g07630R | BraA01g09270R | BraA01g10580R | BraA01g14850R | BraA01g18350R | BraA01g20950R | BraA01g26770R | BraA01g30140R | BraA01g32270R | BraA01g32620R | BraA01g32670R | BraA01g33830R | BraA01g34060R | BraA01g35990R | BraA02g01310R | BraA02g02750R | BraA02g05900R | BraA02g06810R |…
GO:0009698 - phenylpropanoid metabolic process	1.18927e-08	3.5505e-06	2.14821	Over	11985	99	2705	48	BraA01g06380R | BraA01g24540R | BraA02g01310R | BraA02g06190R | BraA02g11520R | BraA03g02890R | BraA03g06590R | BraA03g14120R | BraA03g16040R | BraA03g18870R | BraA03g21370R | BraA03g29420R | BraA03g50430R | BraA03g55060R | BraA03g57630R | BraA03g57830R | BraA03g59060R | BraA04g07120R | BraA04g21060R | BraA04g23370R | BraA04g25550R | BraA04g28160R | BraA05g08820R | BraA05g14100R | BraA05g16310R |…
GO:0042254 - ribosome biogenesis	1.29948e-08	3.55624e-06	0.345809	Under	11985	205	2705	16	BraA01g20080R | BraA01g25840R | BraA01g25850R | BraA02g41050R | BraA03g28790R | BraA03g30080R | BraA04g01180R | BraA04g13300R | BraA04g23790R | BraA06g06560R | BraA06g15240R | BraA07g16350R | BraA08g01830R | BraA09g05660R | BraA09g50180R | BraA09g60490R
GO:0090304 - nucleic acid metabolic process	1.71204e-08	4.32487e-06	0.803715	Under	11985	2161	2705	392	BraA01g02070R | BraA01g02230R | BraA01g02370R | BraA01g02380R | BraA01g03020R | BraA01g06400R | BraA01g08210R | BraA01g08360R | BraA01g08400R | BraA01g08980R | BraA01g10230R | BraA01g10760R | BraA01g11200R | BraA01g12560R | BraA01g15420R | BraA01g16860R | BraA01g18240R | BraA01g18460R | BraA01g20080R | BraA01g20450R | BraA01g21850R | BraA01g22400R | BraA01g24360R | BraA01g25850R | BraA01g26210R |…
GO:0043412 - macromolecule modification	2.48359e-07	5.8258e-05	0.784864	Under	11985	1575	2705	279	BraA01g02320R | BraA01g02370R | BraA01g02380R | BraA01g02990R | BraA01g03020R | BraA01g05530R | BraA01g05690R | BraA01g06400R | BraA01g06860R | BraA01g08140R | BraA01g10340R | BraA01g10580R | BraA01g11460R | BraA01g17710R | BraA01g18460R | BraA01g22260R | BraA01g22470R | BraA01g22610R | BraA01g26850R | BraA01g29170R | BraA01g31570R | BraA01g32640R | BraA01g35220R | BraA01g36580R | BraA02g01110R |…
GO:0034645 - cellular macromolecule biosynthetic process	6.5925e-07	0.000144332	0.827688	Under	11985	2168	2705	405	BraA01g02070R | BraA01g02230R | BraA01g02370R | BraA01g02380R | BraA01g04330R | BraA01g06400R | BraA01g08210R | BraA01g08360R | BraA01g08980R | BraA01g10230R | BraA01g10760R | BraA01g11200R | BraA01g12560R | BraA01g15420R | BraA01g16860R | BraA01g18460R | BraA01g21850R | BraA01g22400R | BraA01g24360R | BraA01g26210R | BraA01g27380R | BraA01g28780R | BraA01g29900R | BraA01g30440R | BraA01g31240R |…
GO:0022613 - ribonucleoprotein complex biogenesis	8.03023e-07	0.00016482	0.470195	Under	11985	245	2705	26	BraA01g20080R | BraA01g25840R | BraA01g25850R | BraA02g04270R | BraA02g17660R | BraA02g41050R | BraA03g19160R | BraA03g28790R | BraA03g30080R | BraA04g01180R | BraA04g13300R | BraA04g14110R | BraA04g23790R | BraA06g06390R | BraA06g06560R | BraA06g15240R | BraA07g04420R | BraA07g16350R | BraA07g39930R | BraA08g01830R | BraA08g18190R | BraA08g34380R | BraA09g01420R | BraA09g05660R | BraA09g50180R |…
GO:0006139 - nucleobase-containing compound metabolic process	1.84213e-06	0.000355855	0.846697	Under	11985	2449	2705	468	BraA01g02070R | BraA01g02230R | BraA01g02370R | BraA01g02380R | BraA01g03020R | BraA01g06400R | BraA01g08120R | BraA01g08210R | BraA01g08360R | BraA01g08400R | BraA01g08980R | BraA01g10230R | BraA01g10760R | BraA01g11200R | BraA01g12560R | BraA01g15420R | BraA01g16860R | BraA01g18240R | BraA01g18460R | BraA01g20080R | BraA01g20450R | BraA01g21850R | BraA01g22400R | BraA01g22580R | BraA01g24360R |…
GO:0034660 - ncRNA metabolic process	3.03145e-06	0.000553072	0.445295	Under	11985	199	2705	20	BraA01g11200R | BraA01g20080R | BraA01g25850R | BraA01g35700R | BraA03g30080R | BraA03g40430R | BraA03g41250R | BraA04g01180R | BraA04g13300R | BraA04g23790R | BraA06g06560R | BraA06g15240R | BraA06g36480R | BraA06g41070R | BraA07g13690R | BraA07g16350R | BraA08g01830R | BraA09g10980R | BraA09g17400R | BraA09g60490R
GO:0006412 - translation	3.41525e-06	0.000577755	0.611499	Under	11985	413	2705	57	BraA01g04330R | BraA01g11200R | BraA01g35700R | BraA02g02580R | BraA02g04270R | BraA02g17660R | BraA02g41050R | BraA03g02870R | BraA03g28790R | BraA03g30710R | BraA03g35270R | BraA03g40430R | BraA03g41250R | BraA03g48400R | BraA04g01180R | BraA04g01340R | BraA04g14110R | BraA04g19310R | BraA04g26950R | BraA04g27680R | BraA04g27700R | BraA05g28850R | BraA05g36220R | BraA06g06560R | BraA06g07920R |…
GO:0044238 - primary metabolic process	3.51861e-06	0.000577755	0.922685	Under	11985	5916	2705	1232	BraA01g01100R | BraA01g01450R | BraA01g01580R | BraA01g01730R | BraA01g02070R | BraA01g02230R | BraA01g02320R | BraA01g02370R | BraA01g02380R | BraA01g02990R | BraA01g03020R | BraA01g03890R | BraA01g04330R | BraA01g05530R | BraA01g05570R | BraA01g05690R | BraA01g06270R | BraA01g06400R | BraA01g06860R | BraA01g07090R | BraA01g07390R | BraA01g07500R | BraA01g08120R | BraA01g08140R | BraA01g08210R |…
GO:0010224 - response to UV-B	4.19621e-06	0.000656207	2.21534	Over	11985	58	2705	29	BraA01g24360R | BraA01g27380R | BraA02g01210R | BraA02g06190R | BraA02g12370R | BraA03g06590R | BraA03g37510R | BraA03g37590R | BraA03g45410R | BraA03g59060R | BraA04g19620R | BraA04g25390R | BraA04g25550R | BraA05g08820R | BraA05g09120R | BraA05g28490R | BraA06g42580R | BraA07g13660R | BraA07g20420R | BraA08g22370R | BraA09g02060R | BraA09g07090R | BraA09g35250R | BraA09g40670R | BraA09g44170R |…
GO:0044550 - secondary metabolite biosynthetic process	5.09295e-06	0.000760239	1.63236	Over	11985	190	2705	70	BraA01g06380R | BraA02g06190R | BraA02g11520R | BraA02g27360R | BraA02g40660R | BraA02g42780R | BraA02g42830R | BraA03g02890R | BraA03g06590R | BraA03g14120R | BraA03g16040R | BraA03g16160R | BraA03g18870R | BraA03g21370R | BraA03g22170R | BraA03g27450R | BraA03g28370R | BraA03g29420R | BraA03g45210R | BraA03g49910R | BraA03g50430R | BraA03g54350R | BraA03g55060R | BraA03g55110R | BraA03g55940R |…
GO:0009059 - macromolecule biosynthetic process	5.97159e-06	0.000852639	0.84509	Under	11985	2202	2705	420	BraA01g02070R | BraA01g02230R | BraA01g02370R | BraA01g02380R | BraA01g04330R | BraA01g06400R | BraA01g08210R | BraA01g08360R | BraA01g08980R | BraA01g10230R | BraA01g10760R | BraA01g11200R | BraA01g12560R | BraA01g15420R | BraA01g16860R | BraA01g18460R | BraA01g21850R | BraA01g22400R | BraA01g24360R | BraA01g26210R | BraA01g27380R | BraA01g28780R | BraA01g29900R | BraA01g30440R | BraA01g31240R |…
GO:0042181 - ketone biosynthetic process	7.73633e-06	0.00105859	2.63072	Over	11985	32	2705	19	BraA01g07390R | BraA02g06190R | BraA02g37020R | BraA03g06590R | BraA03g16040R | BraA04g21060R | BraA05g10610R | BraA05g14100R | BraA05g33330R | BraA06g12530R | BraA06g14430R | BraA07g23890R | BraA07g39540R | BraA08g25830R | BraA08g27650R | BraA09g02060R | BraA09g63240R | BraA10g23590R | BraA10g26880R
GO:0080167 - response to karrikin	8.8283e-06	0.00115969	1.71116	Over	11985	145	2705	56	BraA01g10580R | BraA01g22140R | BraA01g23770R | BraA01g24540R | BraA01g27380R | BraA02g09650R | BraA03g16040R | BraA03g23980R | BraA03g23990R | BraA03g28280R | BraA03g30870R | BraA03g37510R | BraA03g39820R | BraA03g54980R | BraA04g07120R | BraA04g07650R | BraA04g08400R | BraA04g21060R | BraA04g25550R | BraA04g28260R | BraA05g08820R | BraA05g14100R | BraA05g18450R | BraA05g23030R | BraA05g24220R |…
GO:0043094 - cellular metabolic compound salvage	9.6207e-06	0.00119927	1.95161	Over	11985	84	2705	37	BraA01g26770R | BraA01g30140R | BraA01g33200R | BraA02g31710R | BraA02g38500R | BraA03g02080R | BraA03g16470R | BraA03g36060R | BraA03g37870R | BraA03g49410R | BraA04g11250R | BraA04g21930R | BraA05g22480R | BraA05g31030R | BraA05g31040R | BraA05g37520R | BraA06g18080R | BraA06g38030R | BraA07g13350R | BraA07g16190R | BraA07g16920R | BraA07g18120R | BraA07g20100R | BraA08g09350R | BraA08g15840R |…
GO:0009808 - lignin metabolic process	9.85998e-06	0.00119927	2.1415	Over	11985	60	2705	29	BraA02g01310R | BraA02g11520R | BraA03g02890R | BraA03g14120R | BraA03g16040R | BraA03g18870R | BraA03g21370R | BraA03g29420R | BraA03g55060R | BraA03g57630R | BraA03g57830R | BraA03g59060R | BraA04g21060R | BraA04g23370R | BraA04g25550R | BraA04g28160R | BraA05g08820R | BraA05g14100R | BraA05g26460R | BraA05g33570R | BraA06g02210R | BraA06g06700R | BraA06g42200R | BraA09g01700R | BraA09g33420R |…
GO:0006396 - RNA processing	1.1597e-05	0.00136016	0.559665	Under	11985	285	2705	36	BraA01g03020R | BraA01g18240R | BraA01g18460R | BraA01g20080R | BraA01g20450R | BraA01g25850R | BraA02g04270R | BraA03g15370R | BraA03g19160R | BraA03g23460R | BraA03g43660R | BraA03g51050R | BraA04g01060R | BraA04g21270R | BraA05g22070R | BraA05g28850R | BraA05g32240R | BraA06g06390R | BraA06g15950R | BraA06g41070R | BraA07g04820R | BraA07g13690R | BraA07g26980R | BraA07g36880R | BraA08g01830R |…
GO:0006744 - ubiquinone biosynthetic process	1.38912e-05	0.00145931	3.48125	Over	11985	14	2705	11	BraA01g07390R | BraA02g37020R | BraA03g16040R | BraA04g21060R | BraA05g10610R | BraA05g14100R | BraA06g12530R | BraA06g14430R | BraA07g39540R | BraA08g27650R | BraA09g02060R
GO:0006743 - ubiquinone metabolic process	1.38912e-05	0.00145931	3.48125	Over	11985	14	2705	11	BraA01g07390R | BraA02g37020R | BraA03g16040R | BraA04g21060R | BraA05g10610R | BraA05g14100R | BraA06g12530R | BraA06g14430R | BraA07g39540R | BraA08g27650R | BraA09g02060R
GO:0009755 - hormone-mediated signaling pathway	1.39768e-05	0.00145931	0.712674	Under	11985	659	2705	106	BraA01g02320R | BraA01g05530R | BraA01g09740R | BraA01g17710R | BraA01g26210R | BraA01g28800R | BraA02g01120R | BraA02g04670R | BraA02g07990R | BraA02g15700R | BraA02g15910R | BraA02g19810R | BraA02g21280R | BraA02g44200R | BraA03g06930R | BraA03g08580R | BraA03g08610R | BraA03g09770R | BraA03g10000R | BraA03g22500R | BraA03g25380R | BraA03g30330R | BraA03g37160R | BraA03g41160R | BraA03g42100R |…
GO:0009451 - RNA modification	1.42198e-05	0.00145931	0.385277	Under	11985	138	2705	12	BraA01g03020R | BraA02g16750R | BraA03g51050R | BraA03g56110R | BraA06g09720R | BraA06g27790R | BraA06g36480R | BraA07g16350R | BraA07g36460R | BraA07g36880R | BraA09g17400R | BraA10g05660R
GO:0009411 - response to UV	2.02492e-05	0.0020151	1.83493	Over	11985	99	2705	41	BraA01g23770R | BraA01g24360R | BraA01g27380R | BraA01g28910R | BraA02g01210R | BraA02g06190R | BraA02g12370R | BraA03g06590R | BraA03g37510R | BraA03g37590R | BraA03g39820R | BraA03g45210R | BraA03g45410R | BraA03g59060R | BraA04g13430R | BraA04g19620R | BraA04g25390R | BraA04g25550R | BraA05g08820R | BraA05g09120R | BraA05g23030R | BraA05g28490R | BraA06g42580R | BraA07g13660R | BraA07g14780R |…
GO:0044699 - single-organism process	2.47625e-05	0.0023627	1.06282	Over	11985	6545	2705	1570	BraA01g01100R | BraA01g01170R | BraA01g01450R | BraA01g01580R | BraA01g02230R | BraA01g02320R | BraA01g02370R | BraA01g02380R | BraA01g02990R | BraA01g03020R | BraA01g03890R | BraA01g04510R | BraA01g05530R | BraA01g05540R | BraA01g05570R | BraA01g05590R | BraA01g05690R | BraA01g05780R | BraA01g05880R | BraA01g06270R | BraA01g06330R | BraA01g06380R | BraA01g06400R | BraA01g06410R | BraA01g06560R |…
GO:0009657 - plastid organization	2.51811e-05	0.0023627	1.60206	Over	11985	177	2705	64	BraA01g09500R | BraA01g18340R | BraA01g19670R | BraA01g33830R | BraA02g06130R | BraA02g12760R | BraA02g23440R | BraA02g31960R | BraA02g33980R | BraA02g35310R | BraA03g05100R | BraA03g12060R | BraA03g15720R | BraA03g22170R | BraA03g23590R | BraA03g24400R | BraA03g47200R | BraA04g01180R | BraA04g01340R | BraA04g11740R | BraA04g14820R | BraA04g14830R | BraA04g14910R | BraA04g18730R | BraA04g31010R |…
GO:0070925 - organelle assembly	2.82127e-05	0.00257363	0.145268	Under	11985	61	2705	2	BraA07g39930R | BraA09g01420R
GO:0006464 - cellular protein modification process	3.42615e-05	0.00296091	0.818068	Under	11985	1419	2705	262	BraA01g02320R | BraA01g02370R | BraA01g02380R | BraA01g02990R | BraA01g05530R | BraA01g05690R | BraA01g06400R | BraA01g06860R | BraA01g08140R | BraA01g10340R | BraA01g10580R | BraA01g11460R | BraA01g17710R | BraA01g18460R | BraA01g22260R | BraA01g22470R | BraA01g22610R | BraA01g26850R | BraA01g29170R | BraA01g31570R | BraA01g32640R | BraA01g35220R | BraA01g36580R | BraA02g01110R | BraA02g01120R |…
GO:0036211 - protein modification process	3.42615e-05	0.00296091	0.818068	Under	11985	1419	2705	262	BraA01g02320R | BraA01g02370R | BraA01g02380R | BraA01g02990R | BraA01g05530R | BraA01g05690R | BraA01g06400R | BraA01g06860R | BraA01g08140R | BraA01g10340R | BraA01g10580R | BraA01g11460R | BraA01g17710R | BraA01g18460R | BraA01g22260R | BraA01g22470R | BraA01g22610R | BraA01g26850R | BraA01g29170R | BraA01g31570R | BraA01g32640R | BraA01g35220R | BraA01g36580R | BraA02g01110R | BraA02g01120R |…
GO:0032870 - cellular response to hormone stimulus	3.60313e-05	0.00303402	0.734191	Under	11985	694	2705	115	BraA01g02320R | BraA01g05530R | BraA01g09740R | BraA01g17710R | BraA01g21850R | BraA01g26210R | BraA01g28800R | BraA02g01120R | BraA02g04670R | BraA02g07990R | BraA02g15700R | BraA02g15910R | BraA02g19810R | BraA02g21280R | BraA02g44200R | BraA03g02740R | BraA03g06930R | BraA03g08580R | BraA03g08610R | BraA03g09770R | BraA03g10000R | BraA03g22500R | BraA03g25380R | BraA03g30330R | BraA03g33060R |…
GO:0009809 - lignin biosynthetic process	3.81528e-05	0.00313235	2.26686	Over	11985	43	2705	22	BraA02g11520R | BraA03g02890R | BraA03g14120R | BraA03g18870R | BraA03g21370R | BraA03g29420R | BraA03g55060R | BraA03g57630R | BraA03g57830R | BraA03g59060R | BraA04g23370R | BraA04g28160R | BraA05g26460R | BraA05g33570R | BraA06g02210R | BraA06g06700R | BraA06g42200R | BraA09g01700R | BraA09g61950R | BraA10g11630R | BraA10g11650R | BraA10g15510R
GO:0071495 - cellular response to endogenous stimulus	4.30169e-05	0.00344555	0.738447	Under	11985	702	2705	117	BraA01g02320R | BraA01g05530R | BraA01g09740R | BraA01g17710R | BraA01g21850R | BraA01g26210R | BraA01g28800R | BraA02g01120R | BraA02g04670R | BraA02g07990R | BraA02g15700R | BraA02g15910R | BraA02g19810R | BraA02g21280R | BraA02g44200R | BraA02g46430R | BraA03g02740R | BraA03g06930R | BraA03g08580R | BraA03g08610R | BraA03g09770R | BraA03g10000R | BraA03g10970R | BraA03g22500R | BraA03g25380R |…
GO:0003002 - regionalization	4.99735e-05	0.00390745	0.393045	Under	11985	124	2705	11	BraA01g03020R | BraA02g27080R | BraA03g01450R | BraA03g17030R | BraA03g23460R | BraA03g24830R | BraA03g25380R | BraA06g08110R | BraA06g10340R | BraA08g32980R | BraA09g01120R
GO:0034470 - ncRNA processing	5.52885e-05	0.0042225	0.446042	Under	11985	149	2705	15	BraA01g20080R | BraA01g25850R | BraA03g30080R | BraA04g01180R | BraA04g13300R | BraA04g23790R | BraA06g06560R | BraA06g15240R | BraA06g36480R | BraA06g41070R | BraA07g13690R | BraA07g16350R | BraA08g01830R | BraA09g17400R | BraA09g60490R
GO:0009853 - photorespiration	6.72187e-05	0.00501384	2.0571	Over	11985	56	2705	26	BraA01g26770R | BraA01g30140R | BraA01g33200R | BraA03g16470R | BraA03g36060R | BraA03g37870R | BraA04g11250R | BraA04g21930R | BraA05g31030R | BraA05g31040R | BraA06g18080R | BraA06g38030R | BraA07g13350R | BraA07g16190R | BraA07g16920R | BraA07g18120R | BraA07g20100R | BraA08g15840R | BraA08g21350R | BraA08g25870R | BraA08g34120R | BraA09g10730R | BraA09g38220R | BraA09g50190R | BraA09g50200R |…
GO:0046483 - heterocycle metabolic process	7.07541e-05	0.00501384	0.881232	Under	11985	2710	2705	539	BraA01g02070R | BraA01g02230R | BraA01g02370R | BraA01g02380R | BraA01g03020R | BraA01g06380R | BraA01g06400R | BraA01g06410R | BraA01g08120R | BraA01g08210R | BraA01g08360R | BraA01g08400R | BraA01g08980R | BraA01g09740R | BraA01g10230R | BraA01g10760R | BraA01g11200R | BraA01g12560R | BraA01g13820R | BraA01g15420R | BraA01g16860R | BraA01g18240R | BraA01g18460R | BraA01g20080R | BraA01g20450R |…
GO:0007389 - pattern specification process	7.24033e-05	0.00501384	0.439926	Under	11985	141	2705	14	BraA01g03020R | BraA02g27080R | BraA03g01450R | BraA03g13130R | BraA03g17030R | BraA03g23460R | BraA03g24830R | BraA03g25380R | BraA04g23790R | BraA06g08110R | BraA06g10340R | BraA07g28130R | BraA08g32980R | BraA09g01120R
GO:0006855 - drug transmembrane transport	7.42006e-05	0.00501384	2.33842	Over	11985	36	2705	19	BraA01g01170R | BraA01g06330R | BraA01g22930R | BraA01g24460R | BraA02g16150R | BraA02g26220R | BraA03g33060R | BraA04g18780R | BraA05g18210R | BraA05g24140R | BraA06g05000R | BraA06g27120R | BraA07g10810R | BraA08g22730R | BraA09g09370R | BraA09g30740R | BraA10g06930R | BraA10g10010R | BraA10g20970R
GO:0015977 - carbon fixation	7.42006e-05	0.00501384	2.33842	Over	11985	36	2705	19	BraA01g31460R | BraA01g34460R | BraA02g38060R | BraA03g35040R | BraA04g05020R | BraA04g14820R | BraA04g14830R | BraA05g03900R | BraA05g22480R | BraA05g32590R | BraA05g37520R | BraA06g36310R | BraA07g18120R | BraA07g20580R | BraA08g09350R | BraA09g36540R | BraA09g44740R | BraA09g53530R | BraA09g60130R
GO:0044281 - small molecule metabolic process	7.48107e-05	0.00501384	1.18237	Over	11985	1379	2705	368	BraA01g01100R | BraA01g01580R | BraA01g03890R | BraA01g05570R | BraA01g06270R | BraA01g07390R | BraA01g08120R | BraA01g08710R | BraA01g10450R | BraA01g10580R | BraA01g13820R | BraA01g13870R | BraA01g14850R | BraA01g15830R | BraA01g21850R | BraA01g22580R | BraA01g24480R | BraA01g26210R | BraA01g28800R | BraA01g28840R | BraA01g30000R | BraA01g31460R | BraA01g31600R | BraA01g33200R | BraA01g33430R |…
GO:0034641 - cellular nitrogen compound metabolic process	7.68152e-05	0.00504523	0.882574	Under	11985	2736	2705	545	BraA01g02070R | BraA01g02230R | BraA01g02370R | BraA01g02380R | BraA01g03020R | BraA01g06400R | BraA01g06410R | BraA01g08120R | BraA01g08210R | BraA01g08360R | BraA01g08400R | BraA01g08980R | BraA01g09740R | BraA01g10230R | BraA01g10760R | BraA01g11200R | BraA01g12560R | BraA01g13820R | BraA01g15420R | BraA01g16860R | BraA01g18240R | BraA01g18460R | BraA01g20080R | BraA01g20450R | BraA01g21850R |…
GO:0032787 - monocarboxylic acid metabolic process	8.76045e-05	0.00564104	1.35412	Over	11985	409	2705	125	BraA01g01100R | BraA01g08710R | BraA01g10580R | BraA01g13820R | BraA01g13870R | BraA01g14850R | BraA01g28800R | BraA01g28840R | BraA01g30000R | BraA01g31460R | BraA01g34060R | BraA01g35990R | BraA02g01690R | BraA02g02750R | BraA02g07890R | BraA02g16760R | BraA02g16770R | BraA02g17330R | BraA02g18210R | BraA02g22510R | BraA02g26310R | BraA02g26360R | BraA02g26950R | BraA02g31010R | BraA02g37390R |…
GO:0006833 - water transport	9.4633e-05	0.00586367	2.42973	Over	11985	31	2705	17	BraA02g03040R | BraA03g19040R | BraA03g19050R | BraA03g29790R | BraA03g50140R | BraA04g25420R | BraA04g31140R | BraA05g06200R | BraA08g15520R | BraA09g01290R | BraA09g01940R | BraA09g42660R | BraA09g49020R | BraA09g62060R | BraA09g65310R | BraA10g01360R | BraA10g28400R
GO:0042044 - fluid transport	9.4633e-05	0.00586367	2.42973	Over	11985	31	2705	17	BraA02g03040R | BraA03g19040R | BraA03g19050R | BraA03g29790R | BraA03g50140R | BraA04g25420R | BraA04g31140R | BraA05g06200R | BraA08g15520R | BraA09g01290R | BraA09g01940R | BraA09g42660R | BraA09g49020R | BraA09g62060R | BraA09g65310R | BraA10g01360R | BraA10g28400R
GO:0016051 - carbohydrate biosynthetic process	9.80348e-05	0.00596197	1.39916	Over	11985	323	2705	102	BraA01g01100R | BraA01g08710R | BraA01g10450R | BraA01g11030R | BraA01g30000R | BraA01g31460R | BraA01g34460R | BraA02g07130R | BraA02g09010R | BraA02g10110R | BraA02g14750R | BraA02g17330R | BraA02g28310R | BraA02g35250R | BraA02g38060R | BraA02g40660R | BraA02g45620R | BraA03g02890R | BraA03g04830R | BraA03g17030R | BraA03g17540R | BraA03g18280R | BraA03g18430R | BraA03g20020R | BraA03g21670R |…
GO:0008104 - protein localization	0.000104021	0.00621101	0.704274	Under	11985	497	2705	79	BraA01g03700R | BraA01g03750R | BraA01g09340R | BraA01g18340R | BraA01g33510R | BraA02g02540R | BraA02g05150R | BraA02g07850R | BraA02g13450R | BraA02g16160R | BraA02g22410R | BraA02g28090R | BraA02g33980R | BraA02g35310R | BraA03g01500R | BraA03g13120R | BraA03g22470R | BraA03g23820R | BraA03g39830R | BraA03g50880R | BraA04g20730R | BraA04g28950R | BraA04g30920R | BraA04g31010R | BraA05g01650R |…
GO:0044763 - single-organism cellular process	0.000112722	0.00652063	1.07427	Over	11985	5007	2705	1214	BraA01g01100R | BraA01g01170R | BraA01g01580R | BraA01g02320R | BraA01g02370R | BraA01g02380R | BraA01g02990R | BraA01g03890R | BraA01g05530R | BraA01g05540R | BraA01g05570R | BraA01g05690R | BraA01g05780R | BraA01g06270R | BraA01g06330R | BraA01g06380R | BraA01g06400R | BraA01g06410R | BraA01g06560R | BraA01g07390R | BraA01g07630R | BraA01g08120R | BraA01g08210R | BraA01g08400R | BraA01g08710R |…
GO:0071310 - cellular response to organic substance	0.000113178	0.00652063	0.768359	Under	11985	790	2705	137	BraA01g02320R | BraA01g05530R | BraA01g09740R | BraA01g17710R | BraA01g18460R | BraA01g21850R | BraA01g26210R | BraA01g28800R | BraA02g01120R | BraA02g04670R | BraA02g07990R | BraA02g15700R | BraA02g15910R | BraA02g19810R | BraA02g21280R | BraA02g28720R | BraA02g44200R | BraA02g46430R | BraA03g02740R | BraA03g06930R | BraA03g08580R | BraA03g08610R | BraA03g09770R | BraA03g10000R | BraA03g10970R |…
GO:0009658 - chloroplast organization	0.000115439	0.00653626	1.62893	Over	11985	136	2705	50	BraA01g09500R | BraA01g19670R | BraA02g06130R | BraA02g12760R | BraA02g23440R | BraA02g31960R | BraA03g05100R | BraA03g12060R | BraA03g15720R | BraA03g22170R | BraA03g23590R | BraA03g24400R | BraA04g01340R | BraA04g11740R | BraA04g14820R | BraA04g14830R | BraA04g14910R | BraA04g18730R | BraA05g02360R | BraA05g12570R | BraA05g18450R | BraA05g22460R | BraA05g26810R | BraA05g37550R | BraA06g06560R |…
GO:1901661 - quinone metabolic process	0.000138224	0.00756547	2.44452	Over	11985	29	2705	16	BraA01g07390R | BraA02g37020R | BraA03g16040R | BraA04g21060R | BraA05g10610R | BraA05g14100R | BraA05g33330R | BraA06g12530R | BraA06g14430R | BraA07g23890R | BraA07g39540R | BraA08g25830R | BraA08g27650R | BraA09g02060R | BraA09g63240R | BraA10g26880R
GO:1901663 - quinone biosynthetic process	0.000138224	0.00756547	2.44452	Over	11985	29	2705	16	BraA01g07390R | BraA02g37020R | BraA03g16040R | BraA04g21060R | BraA05g10610R | BraA05g14100R | BraA05g33330R | BraA06g12530R | BraA06g14430R | BraA07g23890R | BraA07g39540R | BraA08g25830R | BraA08g27650R | BraA09g02060R | BraA09g63240R | BraA10g26880R
GO:0019253 - reductive pentose-phosphate cycle	0.000159607	0.00859263	2.3538	Over	11985	32	2705	17	BraA01g31460R | BraA01g34460R | BraA02g38060R | BraA03g35040R | BraA04g05020R | BraA04g14820R | BraA04g14830R | BraA05g22480R | BraA05g32590R | BraA05g37520R | BraA06g36310R | BraA07g18120R | BraA07g20580R | BraA08g09350R | BraA09g44740R | BraA09g53530R | BraA09g60130R
GO:0009653 - anatomical structure morphogenesis	0.000170486	0.00903025	0.742085	Under	11985	609	2705	102	BraA01g01170R | BraA01g03020R | BraA01g06400R | BraA01g12560R | BraA01g22320R | BraA01g26420R | BraA01g28800R | BraA01g36310R | BraA01g36580R | BraA02g07850R | BraA02g13560R | BraA02g14420R | BraA02g15660R | BraA02g17150R | BraA02g19800R | BraA02g20110R | BraA02g28310R | BraA02g43410R | BraA02g43800R | BraA03g01450R | BraA03g01540R | BraA03g02740R | BraA03g03100R | BraA03g04160R | BraA03g18280R |…

## Sheet: HC_02
	P-Value	Adj_P-Value	Fold Enrichment	Enrichment Direction	TotalInRef	AnnInRef	TotalInTest	AnnInTest	GenesWithAnn
GO:0015979 - photosynthesis	5.77704e-39	1.54651e-35	3.48374	Over	11985	266	1552	120	BraA01g01480R | BraA01g01490R | BraA01g06390R | BraA01g17350R | BraA01g18020R | BraA01g18570R | BraA01g21650R | BraA01g22090R | BraA01g24950R | BraA01g28470R | BraA02g18680R | BraA02g23300R | BraA02g24060R | BraA02g24600R | BraA02g25980R | BraA02g27380R | BraA02g34430R | BraA02g38820R | BraA02g46620R | BraA03g01200R | BraA03g06460R | BraA03g17890R | BraA03g26500R | BraA03g26800R | BraA03g27340R |…
GO:0019684 - photosynthesis, light reaction	9.87903e-28	1.32231e-24	4.00415	Over	11985	135	1552	70	BraA01g06390R | BraA01g17350R | BraA01g18570R | BraA01g21650R | BraA02g18680R | BraA02g24060R | BraA02g24600R | BraA02g34430R | BraA02g38820R | BraA02g46620R | BraA03g17890R | BraA03g26500R | BraA03g26800R | BraA03g27340R | BraA03g27690R | BraA03g41330R | BraA03g49720R | BraA04g01870R | BraA04g06550R | BraA04g10010R | BraA04g21150R | BraA05g10840R | BraA05g10860R | BraA05g13880R | BraA05g29740R |…
GO:0009765 - photosynthesis, light harvesting	2.85973e-19	2.55183e-16	5.25116	Over	11985	50	1552	34	BraA01g18570R | BraA01g21650R | BraA02g24060R | BraA02g24600R | BraA02g34430R | BraA02g38820R | BraA03g17890R | BraA03g26800R | BraA03g41330R | BraA04g01870R | BraA05g10840R | BraA05g10860R | BraA05g13880R | BraA05g35680R | BraA06g05920R | BraA06g11630R | BraA06g19110R | BraA06g35300R | BraA06g35490R | BraA06g39270R | BraA07g07590R | BraA07g20320R | BraA07g37420R | BraA08g22990R | BraA08g29140R |…
GO:0006091 - generation of precursor metabolites and energy	2.74569e-16	1.83755e-13	2.34918	Over	11985	309	1552	94	BraA01g06390R | BraA01g17350R | BraA01g18570R | BraA01g21650R | BraA02g16820R | BraA02g18680R | BraA02g24060R | BraA02g24600R | BraA02g34430R | BraA02g38630R | BraA02g38820R | BraA02g46620R | BraA03g17890R | BraA03g26500R | BraA03g26700R | BraA03g26800R | BraA03g27340R | BraA03g27690R | BraA03g35810R | BraA03g41330R | BraA03g42400R | BraA03g49720R | BraA04g01870R | BraA04g06550R | BraA04g10010R |…
GO:0009768 - photosynthesis, light harvesting in photosystem I	5.03062e-15	2.69339e-12	5.61621	Over	11985	33	1552	24	BraA01g21650R | BraA02g24600R | BraA02g38820R | BraA03g17890R | BraA03g26800R | BraA03g41330R | BraA04g01870R | BraA05g10840R | BraA05g10860R | BraA05g35680R | BraA06g05920R | BraA06g11630R | BraA06g19110R | BraA06g35490R | BraA07g07590R | BraA07g20320R | BraA08g22990R | BraA08g29140R | BraA09g03940R | BraA09g16580R | BraA09g27650R | BraA09g43900R | BraA09g62370R | BraA10g11710R
GO:0009416 - response to light stimulus	6.78244e-13	2.70443e-10	1.76205	Over	11985	653	1552	149	BraA01g08990R | BraA01g10970R | BraA01g16810R | BraA01g17350R | BraA01g18020R | BraA01g19870R | BraA01g21650R | BraA01g22090R | BraA01g36000R | BraA02g02350R | BraA02g06880R | BraA02g07480R | BraA02g13110R | BraA02g18680R | BraA02g19140R | BraA02g24600R | BraA02g25320R | BraA02g25440R | BraA02g25770R | BraA02g27380R | BraA02g33240R | BraA02g36740R | BraA02g38820R | BraA02g40240R | BraA02g45070R |…
GO:0009314 - response to radiation	7.07173e-13	2.70443e-10	1.75348	Over	11985	665	1552	151	BraA01g08990R | BraA01g10970R | BraA01g16810R | BraA01g17350R | BraA01g18020R | BraA01g19870R | BraA01g21650R | BraA01g22090R | BraA01g36000R | BraA02g02350R | BraA02g06880R | BraA02g07480R | BraA02g13110R | BraA02g18680R | BraA02g19140R | BraA02g24600R | BraA02g25320R | BraA02g25440R | BraA02g25770R | BraA02g25980R | BraA02g27380R | BraA02g33240R | BraA02g36740R | BraA02g38820R | BraA02g40240R |…
GO:0009642 - response to light intensity	2.85866e-12	9.56581e-10	2.85131	Over	11985	130	1552	48	BraA01g17350R | BraA01g18020R | BraA01g21650R | BraA01g22090R | BraA02g02350R | BraA02g07480R | BraA02g18680R | BraA02g33240R | BraA02g38820R | BraA02g46620R | BraA03g27690R | BraA03g41330R | BraA03g45710R | BraA04g01870R | BraA04g14180R | BraA04g15600R | BraA04g19390R | BraA05g05790R | BraA05g13880R | BraA05g28840R | BraA05g29740R | BraA05g39830R | BraA06g19110R | BraA06g22790R | BraA06g26710R |…
GO:0018298 - protein-chromophore linkage	2.185e-11	6.49915e-09	3.86115	Over	11985	56	1552	28	BraA01g21650R | BraA02g24600R | BraA02g34430R | BraA02g38820R | BraA03g17890R | BraA03g26800R | BraA03g41330R | BraA04g01870R | BraA05g10840R | BraA05g10860R | BraA05g28840R | BraA05g35680R | BraA06g11630R | BraA06g19110R | BraA06g35490R | BraA06g39270R | BraA07g02610R | BraA07g07590R | BraA07g20320R | BraA08g22990R | BraA08g29140R | BraA09g03940R | BraA09g16580R | BraA09g22500R | BraA09g27650R |…
GO:0009767 - photosynthetic electron transport chain	2.84713e-10	7.62176e-08	3.54466	Over	11985	61	1552	28	BraA01g06390R | BraA01g17350R | BraA02g18680R | BraA02g46620R | BraA03g26500R | BraA03g27340R | BraA03g27690R | BraA03g49720R | BraA04g06550R | BraA05g13880R | BraA05g29740R | BraA06g01160R | BraA06g05920R | BraA06g25880R | BraA07g16120R | BraA07g29530R | BraA07g31320R | BraA08g01400R | BraA08g17860R | BraA09g01720R | BraA09g10250R | BraA09g16840R | BraA09g25330R | BraA09g25650R | BraA09g28820R |…
GO:0009644 - response to high light intensity	8.07768e-10	1.81893e-07	3.12802	Over	11985	79	1552	32	BraA01g17350R | BraA01g18020R | BraA01g21650R | BraA02g02350R | BraA02g18680R | BraA02g38820R | BraA02g46620R | BraA03g27690R | BraA03g41330R | BraA04g01870R | BraA04g15600R | BraA05g13880R | BraA05g29740R | BraA06g19110R | BraA06g22790R | BraA06g35490R | BraA07g16120R | BraA07g20320R | BraA07g29530R | BraA07g31320R | BraA08g05440R | BraA08g17860R | BraA09g03940R | BraA09g10250R | BraA09g16580R |…
GO:0015995 - chlorophyll biosynthetic process	8.15358e-10	1.81893e-07	3.19188	Over	11985	75	1552	31	BraA01g08720R | BraA01g10970R | BraA01g17820R | BraA01g18020R | BraA01g19870R | BraA02g23300R | BraA02g25770R | BraA02g34430R | BraA03g04270R | BraA03g06460R | BraA03g12010R | BraA03g45450R | BraA03g47420R | BraA03g52040R | BraA04g27780R | BraA04g27920R | BraA05g30610R | BraA06g06010R | BraA06g39270R | BraA06g41080R | BraA07g01280R | BraA07g20990R | BraA07g22250R | BraA07g36650R | BraA09g18100R |…
GO:0033014 - tetrapyrrole biosynthetic process	1.13353e-09	2.3342e-07	3.03376	Over	11985	84	1552	33	BraA01g08720R | BraA01g10970R | BraA01g17820R | BraA01g18020R | BraA01g19870R | BraA02g23300R | BraA02g25770R | BraA02g34430R | BraA03g04270R | BraA03g06460R | BraA03g12010R | BraA03g45450R | BraA03g47420R | BraA03g52040R | BraA04g27780R | BraA04g27920R | BraA05g30610R | BraA06g06010R | BraA06g39270R | BraA06g41080R | BraA07g01280R | BraA07g16420R | BraA07g20990R | BraA07g22250R | BraA07g36650R |…
GO:0042548 - regulation of photosynthesis, light reaction	1.53724e-09	2.74346e-07	5.1482	Over	11985	24	1552	16	BraA01g17350R | BraA02g18680R | BraA02g46620R | BraA03g27690R | BraA04g21150R | BraA05g13880R | BraA05g29740R | BraA06g01160R | BraA07g16120R | BraA07g29530R | BraA07g31320R | BraA08g01400R | BraA08g17860R | BraA09g10250R | BraA09g25650R | BraA10g05540R
GO:0043467 - regulation of generation of precursor metabolites and energy	1.53724e-09	2.74346e-07	5.1482	Over	11985	24	1552	16	BraA01g17350R | BraA02g18680R | BraA02g46620R | BraA03g27690R | BraA04g21150R | BraA05g13880R | BraA05g29740R | BraA06g01160R | BraA07g16120R | BraA07g29530R | BraA07g31320R | BraA08g01400R | BraA08g17860R | BraA09g10250R | BraA09g25650R | BraA10g05540R
GO:0006779 - porphyrin-containing compound biosynthetic process	1.71225e-09	2.86481e-07	3.05078	Over	11985	81	1552	32	BraA01g08720R | BraA01g10970R | BraA01g17820R | BraA01g18020R | BraA01g19870R | BraA02g23300R | BraA02g25770R | BraA02g34430R | BraA03g04270R | BraA03g06460R | BraA03g12010R | BraA03g45450R | BraA03g47420R | BraA03g52040R | BraA04g27780R | BraA04g27920R | BraA05g30610R | BraA06g06010R | BraA06g39270R | BraA06g41080R | BraA07g01280R | BraA07g20990R | BraA07g22250R | BraA07g36650R | BraA09g18100R |…
GO:0010205 - photoinhibition	3.94653e-09	5.86937e-07	5.90528	Over	11985	17	1552	13	BraA01g17350R | BraA02g18680R | BraA02g46620R | BraA03g27690R | BraA05g13880R | BraA05g29740R | BraA07g16120R | BraA07g29530R | BraA07g31320R | BraA08g17860R | BraA09g10250R | BraA09g25650R | BraA10g05540R
GO:0043155 - negative regulation of photosynthesis, light reaction	3.94653e-09	5.86937e-07	5.90528	Over	11985	17	1552	13	BraA01g17350R | BraA02g18680R | BraA02g46620R | BraA03g27690R | BraA05g13880R | BraA05g29740R | BraA07g16120R | BraA07g29530R | BraA07g31320R | BraA08g17860R | BraA09g10250R | BraA09g25650R | BraA10g05540R
GO:0035303 - regulation of dephosphorylation	1.25566e-08	1.76916e-06	7.02027	Over	11985	11	1552	10	BraA01g17350R | BraA02g46620R | BraA06g39540R | BraA07g12540R | BraA07g16120R | BraA08g12680R | BraA08g24810R | BraA09g10250R | BraA09g22160R | BraA09g36330R
GO:0022900 - electron transport chain	1.47077e-08	1.96862e-06	2.73498	Over	11985	96	1552	34	BraA01g06390R | BraA01g17350R | BraA02g18680R | BraA02g38630R | BraA02g46620R | BraA03g26500R | BraA03g26700R | BraA03g27340R | BraA03g27690R | BraA03g49720R | BraA04g06550R | BraA05g13880R | BraA05g29740R | BraA06g01160R | BraA06g05920R | BraA06g25880R | BraA07g16120R | BraA07g29530R | BraA07g31320R | BraA08g01400R | BraA08g17860R | BraA09g01720R | BraA09g10250R | BraA09g16840R | BraA09g25330R |…
GO:0051188 - cofactor biosynthetic process	2.26783e-08	2.89094e-06	2.20021	Over	11985	179	1552	51	BraA01g08720R | BraA01g10970R | BraA01g17820R | BraA01g18020R | BraA01g19870R | BraA01g27560R | BraA02g16820R | BraA02g23300R | BraA02g25770R | BraA02g34430R | BraA03g01280R | BraA03g04270R | BraA03g04340R | BraA03g06460R | BraA03g12010R | BraA03g16760R | BraA03g17960R | BraA03g29130R | BraA03g34620R | BraA03g37280R | BraA03g37410R | BraA03g39050R | BraA03g45450R | BraA03g47420R | BraA03g52040R |…
GO:0009628 - response to abiotic stimulus	3.56064e-08	4.33265e-06	1.32268	Over	11985	1734	1552	297	BraA01g08270R | BraA01g08990R | BraA01g10440R | BraA01g10570R | BraA01g10800R | BraA01g10970R | BraA01g13860R | BraA01g16810R | BraA01g17350R | BraA01g18020R | BraA01g18910R | BraA01g19870R | BraA01g21650R | BraA01g22090R | BraA01g23580R | BraA01g27560R | BraA01g28080R | BraA01g28100R | BraA01g32900R | BraA01g33580R | BraA01g36000R | BraA02g02350R | BraA02g04330R | BraA02g06880R | BraA02g07000R |…
GO:0046148 - pigment biosynthetic process	1.00148e-07	1.16564e-05	2.30026	Over	11985	141	1552	42	BraA01g08720R | BraA01g10970R | BraA01g17820R | BraA01g18020R | BraA01g19870R | BraA02g20550R | BraA02g23300R | BraA02g25770R | BraA02g34430R | BraA02g45070R | BraA03g04270R | BraA03g06460R | BraA03g08200R | BraA03g12010R | BraA03g34620R | BraA03g45450R | BraA03g47420R | BraA03g52040R | BraA04g27780R | BraA04g27920R | BraA05g30610R | BraA06g06010R | BraA06g39270R | BraA06g39570R | BraA06g41080R |…
GO:0040008 - regulation of growth	1.28791e-07	1.43656e-05	2.09488	Over	11985	188	1552	51	BraA01g22070R | BraA01g28080R | BraA02g06880R | BraA02g08410R | BraA02g08420R | BraA02g08460R | BraA02g08480R | BraA02g08500R | BraA02g08520R | BraA02g18450R | BraA02g19960R | BraA02g36430R | BraA03g08600R | BraA03g08620R | BraA03g12010R | BraA03g18160R | BraA03g38860R | BraA04g31490R | BraA05g09850R | BraA05g38790R | BraA05g40220R | BraA06g28190R | BraA06g42480R | BraA07g03150R | BraA07g12910R |…
GO:0010109 - regulation of photosynthesis	1.464e-07	1.56765e-05	3.75679	Over	11985	37	1552	18	BraA01g17350R | BraA01g22090R | BraA02g18680R | BraA02g27380R | BraA02g46620R | BraA03g27690R | BraA04g21150R | BraA05g13880R | BraA05g29740R | BraA06g01160R | BraA07g16120R | BraA07g29530R | BraA07g31320R | BraA08g01400R | BraA08g17860R | BraA09g10250R | BraA09g25650R | BraA10g05540R
GO:0009645 - response to low light intensity stimulus	1.94351e-07	1.94686e-05	4.50467	Over	11985	24	1552	14	BraA01g21650R | BraA02g38820R | BraA03g41330R | BraA04g01870R | BraA04g19390R | BraA05g28840R | BraA06g19110R | BraA06g35490R | BraA07g20320R | BraA09g03940R | BraA09g16580R | BraA09g28570R | BraA09g43900R | BraA09g47190R
GO:0006778 - porphyrin-containing compound metabolic process	1.96359e-07	1.94686e-05	2.45709	Over	11985	110	1552	35	BraA01g08720R | BraA01g10970R | BraA01g17820R | BraA01g18020R | BraA01g19870R | BraA02g23300R | BraA02g25770R | BraA02g34430R | BraA03g01280R | BraA03g04270R | BraA03g06460R | BraA03g12010R | BraA03g45450R | BraA03g47420R | BraA03g52040R | BraA04g27780R | BraA04g27920R | BraA05g30610R | BraA06g06010R | BraA06g39270R | BraA06g41080R | BraA07g01280R | BraA07g16420R | BraA07g18180R | BraA07g20990R |…
GO:0015994 - chlorophyll metabolic process	2.17406e-07	2.07855e-05	2.52313	Over	11985	101	1552	33	BraA01g08720R | BraA01g10970R | BraA01g17820R | BraA01g18020R | BraA01g19870R | BraA02g23300R | BraA02g25770R | BraA02g34430R | BraA03g01280R | BraA03g04270R | BraA03g06460R | BraA03g12010R | BraA03g45450R | BraA03g47420R | BraA03g52040R | BraA04g27780R | BraA04g27920R | BraA05g30610R | BraA06g06010R | BraA06g39270R | BraA06g41080R | BraA07g01280R | BraA07g18180R | BraA07g20990R | BraA07g22250R |…
GO:0033013 - tetrapyrrole metabolic process	2.51573e-07	2.32228e-05	2.43496	Over	11985	111	1552	35	BraA01g08720R | BraA01g10970R | BraA01g17820R | BraA01g18020R | BraA01g19870R | BraA02g23300R | BraA02g25770R | BraA02g34430R | BraA03g01280R | BraA03g04270R | BraA03g06460R | BraA03g12010R | BraA03g45450R | BraA03g47420R | BraA03g52040R | BraA04g27780R | BraA04g27920R | BraA05g30610R | BraA06g06010R | BraA06g39270R | BraA06g41080R | BraA07g01280R | BraA07g16420R | BraA07g18180R | BraA07g20990R |…
GO:0035304 - regulation of protein dephosphorylation	6.03465e-07	5.38492e-05	7.72229	Over	11985	7	1552	7	BraA01g17350R | BraA02g46620R | BraA07g12540R | BraA07g16120R | BraA08g24810R | BraA09g10250R | BraA09g36330R
GO:0009639 - response to red or far red light	1.02178e-06	8.82359e-05	1.96918	Over	11985	200	1552	51	BraA01g18020R | BraA02g06880R | BraA02g24600R | BraA02g25440R | BraA02g25770R | BraA02g36740R | BraA02g38820R | BraA02g40240R | BraA03g23560R | BraA03g26800R | BraA03g29480R | BraA03g41330R | BraA03g42660R | BraA03g43020R | BraA03g43710R | BraA04g11870R | BraA04g14270R | BraA04g17740R | BraA04g31570R | BraA05g28840R | BraA05g35680R | BraA06g11400R | BraA06g13770R | BraA06g18570R | BraA06g22860R |…
GO:0051186 - cofactor metabolic process	1.55106e-06	0.000129756	1.7863	Over	11985	281	1552	65	BraA01g08720R | BraA01g10970R | BraA01g14010R | BraA01g16360R | BraA01g17820R | BraA01g18020R | BraA01g19870R | BraA01g27560R | BraA02g16820R | BraA02g23300R | BraA02g25770R | BraA02g29450R | BraA02g34430R | BraA03g01280R | BraA03g04270R | BraA03g04340R | BraA03g06460R | BraA03g12010R | BraA03g16760R | BraA03g17960R | BraA03g29130R | BraA03g34620R | BraA03g37280R | BraA03g37410R | BraA03g39050R |…
GO:0009769 - photosynthesis, light harvesting in photosystem II	2.74653e-06	0.000222802	6.17784	Over	11985	10	1552	8	BraA02g38820R | BraA03g17890R | BraA03g41330R | BraA05g10840R | BraA05g10860R | BraA06g35490R | BraA09g03940R | BraA10g11710R
GO:0042440 - pigment metabolic process	3.64027e-06	0.000286618	1.99871	Over	11985	170	1552	44	BraA01g08720R | BraA01g10970R | BraA01g17820R | BraA01g18020R | BraA01g19870R | BraA02g20550R | BraA02g23300R | BraA02g25770R | BraA02g34430R | BraA02g45070R | BraA03g04270R | BraA03g06460R | BraA03g08200R | BraA03g12010R | BraA03g34620R | BraA03g45450R | BraA03g47420R | BraA03g52040R | BraA04g27780R | BraA04g27920R | BraA05g30610R | BraA06g06010R | BraA06g39270R | BraA06g39570R | BraA06g41080R |…
GO:0040007 - growth	4.98527e-06	0.000381302	1.56107	Over	11985	465	1552	94	BraA01g05860R | BraA01g08990R | BraA01g10310R | BraA01g18890R | BraA01g22070R | BraA01g28080R | BraA02g06880R | BraA02g08410R | BraA02g08420R | BraA02g08460R | BraA02g08480R | BraA02g08500R | BraA02g08520R | BraA02g16640R | BraA02g18450R | BraA02g19960R | BraA02g25300R | BraA02g29160R | BraA02g34390R | BraA02g36430R | BraA02g39420R | BraA03g04440R | BraA03g04800R | BraA03g07370R | BraA03g08600R |…
GO:0010114 - response to red light	6.48855e-06	0.000482496	2.5741	Over	11985	72	1552	24	BraA01g18020R | BraA02g36740R | BraA02g38820R | BraA03g23560R | BraA03g26800R | BraA03g29480R | BraA03g41330R | BraA04g11870R | BraA04g14270R | BraA04g17740R | BraA05g28840R | BraA05g35680R | BraA06g11400R | BraA06g18570R | BraA06g22860R | BraA06g35490R | BraA07g15690R | BraA07g20320R | BraA07g23230R | BraA09g03940R | BraA09g06910R | BraA09g27650R | BraA09g28570R | BraA09g43900R
GO:0009637 - response to blue light	7.659e-06	0.000554139	2.44853	Over	11985	82	1552	26	BraA01g18020R | BraA02g19140R | BraA02g24600R | BraA02g36740R | BraA02g38820R | BraA03g16060R | BraA03g26800R | BraA03g36550R | BraA03g41330R | BraA04g11870R | BraA04g14270R | BraA04g19390R | BraA04g25520R | BraA05g28840R | BraA05g35680R | BraA06g34700R | BraA06g35490R | BraA07g20320R | BraA09g03940R | BraA09g06910R | BraA09g08910R | BraA09g27650R | BraA09g28570R | BraA09g43900R | BraA09g47190R |…
GO:0010218 - response to far red light	8.6169e-06	0.000607038	2.80811	Over	11985	55	1552	20	BraA01g18020R | BraA02g24600R | BraA02g36740R | BraA02g38820R | BraA03g26800R | BraA03g41330R | BraA04g11870R | BraA04g14270R | BraA05g28840R | BraA05g35680R | BraA06g34700R | BraA06g35490R | BraA06g38370R | BraA07g20320R | BraA09g03940R | BraA09g06910R | BraA09g23110R | BraA09g27650R | BraA09g28570R | BraA09g43900R
GO:0010207 - photosystem II assembly	9.07381e-06	0.000607563	4.24726	Over	11985	20	1552	11	BraA01g17350R | BraA02g46620R | BraA03g26800R | BraA07g16120R | BraA07g39890R | BraA08g15410R | BraA09g06910R | BraA09g10250R | BraA09g14970R | BraA09g27650R | BraA10g02900R
GO:0009725 - response to hormone	9.07826e-06	0.000607563	1.30284	Over	11985	1304	1552	220	BraA01g01480R | BraA01g01490R | BraA01g06110R | BraA01g08990R | BraA01g13860R | BraA01g14010R | BraA01g17160R | BraA01g21650R | BraA01g28100R | BraA01g29720R | BraA01g30490R | BraA01g32450R | BraA01g32950R | BraA01g33370R | BraA02g06880R | BraA02g07240R | BraA02g08410R | BraA02g08420R | BraA02g08460R | BraA02g08480R | BraA02g08500R | BraA02g08520R | BraA02g13210R | BraA02g17680R | BraA02g19820R |…
GO:0009409 - response to cold	1.54191e-05	0.00100675	1.61426	Over	11985	354	1552	74	BraA01g21650R | BraA01g23580R | BraA01g27560R | BraA01g32900R | BraA01g33580R | BraA02g04330R | BraA02g13210R | BraA02g24330R | BraA02g25440R | BraA02g30510R | BraA02g38820R | BraA03g01200R | BraA03g13840R | BraA03g19880R | BraA03g21950R | BraA03g21960R | BraA03g26500R | BraA03g27690R | BraA03g34440R | BraA03g37410R | BraA03g41330R | BraA03g45710R | BraA03g51570R | BraA03g58130R | BraA04g01850R |…
GO:0022613 - ribonucleoprotein complex biogenesis	1.96901e-05	0.00125501	0.378235	Under	11985	245	1552	12	BraA02g07700R | BraA03g23920R | BraA04g18420R | BraA04g24950R | BraA06g09020R | BraA06g41920R | BraA07g30230R | BraA09g41240R | BraA09g53150R | BraA09g60260R | BraA10g16050R | BraA10g31640R
GO:0009734 - auxin-activated signaling pathway	2.22522e-05	0.00138533	1.91887	Over	11985	165	1552	41	BraA01g30490R | BraA02g08410R | BraA02g08420R | BraA02g08460R | BraA02g08480R | BraA02g08500R | BraA02g08520R | BraA02g19820R | BraA02g36430R | BraA03g05820R | BraA03g08600R | BraA03g08620R | BraA03g36550R | BraA03g37140R | BraA03g53600R | BraA04g18760R | BraA05g03890R | BraA05g22720R | BraA05g38820R | BraA06g34700R | BraA06g42480R | BraA07g12540R | BraA08g10930R | BraA08g10970R | BraA08g23140R |…
GO:1901566 - organonitrogen compound biosynthetic process	6.5509e-05	0.00398563	1.46646	Over	11985	495	1552	94	BraA01g08720R | BraA01g10970R | BraA01g14010R | BraA01g17820R | BraA01g18020R | BraA01g18890R | BraA01g19870R | BraA01g27560R | BraA01g33240R | BraA02g03920R | BraA02g07600R | BraA02g08360R | BraA02g13340R | BraA02g23300R | BraA02g25770R | BraA02g34430R | BraA02g43720R | BraA03g01280R | BraA03g01950R | BraA03g04220R | BraA03g04270R | BraA03g04340R | BraA03g06460R | BraA03g08570R | BraA03g12010R |…
GO:0071365 - cellular response to auxin stimulus	7.16147e-05	0.00426028	1.83014	Over	11985	173	1552	41	BraA01g30490R | BraA02g08410R | BraA02g08420R | BraA02g08460R | BraA02g08480R | BraA02g08500R | BraA02g08520R | BraA02g19820R | BraA02g36430R | BraA03g05820R | BraA03g08600R | BraA03g08620R | BraA03g36550R | BraA03g37140R | BraA03g53600R | BraA04g18760R | BraA05g03890R | BraA05g22720R | BraA05g38820R | BraA06g34700R | BraA06g42480R | BraA07g12540R | BraA08g10930R | BraA08g10970R | BraA08g23140R |…
GO:0009773 - photosynthetic electron transport in photosystem I	0.00011686	0.00674894	3.67728	Over	11985	21	1552	10	BraA01g06390R | BraA03g26500R | BraA03g27340R | BraA03g49720R | BraA04g06550R | BraA06g01160R | BraA06g25880R | BraA08g01400R | BraA09g28820R | BraA09g43160R
GO:0010206 - photosystem II repair	0.000123533	0.00674894	4.91419	Over	11985	11	1552	7	BraA01g18570R | BraA02g24060R | BraA05g13880R | BraA06g35300R | BraA07g37420R | BraA10g02900R | BraA10g05540R
GO:0006782 - protoporphyrinogen IX biosynthetic process	0.000123533	0.00674894	4.91419	Over	11985	11	1552	7	BraA01g19870R | BraA03g04270R | BraA04g27920R | BraA05g30610R | BraA09g18100R | BraA09g50590R | BraA10g01990R
GO:0046501 - protoporphyrinogen IX metabolic process	0.000123533	0.00674894	4.91419	Over	11985	11	1552	7	BraA01g19870R | BraA03g04270R | BraA04g27920R | BraA05g30610R | BraA09g18100R | BraA09g50590R | BraA10g01990R
GO:0009733 - response to auxin	0.00012869	0.00686862	1.59142	Over	11985	296	1552	61	BraA01g06110R | BraA01g29720R | BraA01g30490R | BraA02g08410R | BraA02g08420R | BraA02g08460R | BraA02g08480R | BraA02g08500R | BraA02g08520R | BraA02g13210R | BraA02g19820R | BraA02g20550R | BraA02g36430R | BraA03g04800R | BraA03g05820R | BraA03g07320R | BraA03g08600R | BraA03g08620R | BraA03g36550R | BraA03g37140R | BraA03g53600R | BraA04g14180R | BraA04g15600R | BraA04g18760R | BraA05g01930R |…
GO:0009719 - response to endogenous stimulus	0.000130855	0.00686862	1.24805	Over	11985	1386	1552	224	BraA01g01480R | BraA01g01490R | BraA01g06110R | BraA01g08990R | BraA01g13860R | BraA01g14010R | BraA01g17160R | BraA01g21650R | BraA01g26170R | BraA01g28100R | BraA01g29720R | BraA01g30490R | BraA01g32450R | BraA01g32950R | BraA01g33370R | BraA02g06880R | BraA02g07240R | BraA02g08410R | BraA02g08420R | BraA02g08460R | BraA02g08480R | BraA02g08500R | BraA02g08520R | BraA02g13210R | BraA02g17680R |…
GO:0042549 - photosystem II stabilization	0.000193881	0.00998116	6.43524	Over	11985	6	1552	5	BraA01g17350R | BraA02g46620R | BraA04g21150R | BraA07g16120R | BraA09g10250R

## Sheet: HC_03
	P-Value	Adj_P-Value	Fold Enrichment	Enrichment Direction	TotalInRef	AnnInRef	TotalInTest	AnnInTest	GenesWithAnn
GO:0006412 - translation	1.1499e-181	1.62595e-178	11.4857	Over	11985	413	523	207	BraA01g02360R | BraA01g08620R | BraA01g10600R | BraA01g14270R | BraA01g16110R | BraA01g16790R | BraA01g23020R | BraA01g30550R | BraA01g32210R | BraA01g34690R | BraA02g01620R | BraA02g01720R | BraA02g02100R | BraA02g02490R | BraA02g02990R | BraA02g09670R | BraA02g10100R | BraA02g12480R | BraA02g12550R | BraA02g13770R | BraA02g13780R | BraA02g16550R | BraA02g18480R | BraA02g20270R | BraA02g26700R |…
GO:0022613 - ribonucleoprotein complex biogenesis	1.95515e-102	1.38229e-99	11.4112	Over	11985	245	523	122	BraA01g08620R | BraA01g09180R | BraA01g10600R | BraA01g11040R | BraA01g13680R | BraA01g16110R | BraA01g20430R | BraA01g29080R | BraA02g01620R | BraA02g02100R | BraA02g02990R | BraA02g07070R | BraA02g09670R | BraA02g13770R | BraA02g14140R | BraA02g20270R | BraA02g28210R | BraA02g29040R | BraA02g29740R | BraA02g40190R | BraA03g02260R | BraA03g03230R | BraA03g07000R | BraA03g12850R | BraA03g17900R |…
GO:0042254 - ribosome biogenesis	9.49251e-100	4.47414e-97	12.5199	Over	11985	205	523	112	BraA01g08620R | BraA01g09180R | BraA01g10600R | BraA01g11040R | BraA01g13680R | BraA01g16110R | BraA01g29080R | BraA02g01620R | BraA02g02100R | BraA02g02990R | BraA02g07070R | BraA02g09670R | BraA02g13770R | BraA02g14140R | BraA02g20270R | BraA02g28210R | BraA02g29040R | BraA02g40190R | BraA03g02260R | BraA03g03230R | BraA03g07000R | BraA03g12850R | BraA03g17900R | BraA03g20570R | BraA03g21190R |…
GO:0010467 - gene expression	3.394e-64	1.19978e-61	2.70499	Over	11985	2245	523	265	BraA01g02360R | BraA01g07520R | BraA01g08620R | BraA01g09180R | BraA01g10600R | BraA01g11040R | BraA01g14270R | BraA01g16110R | BraA01g16790R | BraA01g20430R | BraA01g23020R | BraA01g30550R | BraA01g32210R | BraA01g34480R | BraA01g34690R | BraA01g35670R | BraA02g01620R | BraA02g01720R | BraA02g02100R | BraA02g02490R | BraA02g02990R | BraA02g05530R | BraA02g09490R | BraA02g09670R | BraA02g10100R |…
GO:0044085 - cellular component biogenesis	1.08696e-62	3.07394e-60	4.80706	Over	11985	696	523	146	BraA01g08620R | BraA01g09180R | BraA01g09700R | BraA01g10600R | BraA01g11040R | BraA01g11090R | BraA01g13680R | BraA01g16110R | BraA01g20430R | BraA01g29080R | BraA01g35830R | BraA02g01620R | BraA02g02100R | BraA02g02990R | BraA02g07070R | BraA02g09490R | BraA02g09670R | BraA02g13770R | BraA02g14140R | BraA02g20270R | BraA02g28210R | BraA02g29040R | BraA02g29740R | BraA02g40190R | BraA02g44550R |…
GO:0034645 - cellular macromolecule biosynthetic process	5.99278e-58	1.4123e-55	2.65308	Over	11985	2168	523	251	BraA01g02360R | BraA01g07520R | BraA01g08620R | BraA01g09180R | BraA01g10600R | BraA01g14270R | BraA01g16110R | BraA01g16790R | BraA01g20430R | BraA01g23020R | BraA01g30550R | BraA01g32210R | BraA01g34480R | BraA01g34690R | BraA01g35830R | BraA02g01620R | BraA02g01720R | BraA02g02100R | BraA02g02490R | BraA02g02990R | BraA02g05530R | BraA02g09490R | BraA02g09670R | BraA02g10100R | BraA02g12480R |…
GO:0009059 - macromolecule biosynthetic process	1.4656e-56	2.96051e-54	2.61212	Over	11985	2202	523	251	BraA01g02360R | BraA01g07520R | BraA01g08620R | BraA01g09180R | BraA01g10600R | BraA01g14270R | BraA01g16110R | BraA01g16790R | BraA01g20430R | BraA01g23020R | BraA01g30550R | BraA01g32210R | BraA01g34480R | BraA01g34690R | BraA01g35830R | BraA02g01620R | BraA02g01720R | BraA02g02100R | BraA02g02490R | BraA02g02990R | BraA02g05530R | BraA02g09490R | BraA02g09670R | BraA02g10100R | BraA02g12480R |…
GO:0044267 - cellular protein metabolic process	2.33655e-55	4.12986e-53	2.62969	Over	11985	2135	523	245	BraA01g02360R | BraA01g08620R | BraA01g09180R | BraA01g10390R | BraA01g10600R | BraA01g14270R | BraA01g16110R | BraA01g16790R | BraA01g23020R | BraA01g30550R | BraA01g32210R | BraA01g34690R | BraA01g34910R | BraA01g35830R | BraA02g01620R | BraA02g01720R | BraA02g02100R | BraA02g02490R | BraA02g02990R | BraA02g09490R | BraA02g09670R | BraA02g10100R | BraA02g12480R | BraA02g12550R | BraA02g13770R |…
GO:0019538 - protein metabolic process	8.8993e-52	1.39818e-49	2.46576	Over	11985	2342	523	252	BraA01g02360R | BraA01g08620R | BraA01g09180R | BraA01g10390R | BraA01g10600R | BraA01g14270R | BraA01g16110R | BraA01g16790R | BraA01g23020R | BraA01g30550R | BraA01g32210R | BraA01g34690R | BraA01g34910R | BraA01g35830R | BraA02g01620R | BraA02g01720R | BraA02g02100R | BraA02g02490R | BraA02g02990R | BraA02g09490R | BraA02g09670R | BraA02g10100R | BraA02g12480R | BraA02g12550R | BraA02g13770R |…
GO:0044260 - cellular macromolecule metabolic process	2.90978e-46	4.11442e-44	1.85305	Over	11985	4217	523	341	BraA01g02360R | BraA01g07520R | BraA01g08620R | BraA01g09180R | BraA01g09700R | BraA01g10390R | BraA01g10600R | BraA01g11040R | BraA01g14270R | BraA01g15470R | BraA01g16110R | BraA01g16790R | BraA01g20430R | BraA01g23020R | BraA01g29080R | BraA01g30550R | BraA01g32210R | BraA01g34480R | BraA01g34690R | BraA01g34910R | BraA01g34940R | BraA01g35670R | BraA01g35830R | BraA02g01620R | BraA02g01720R |…
GO:0043170 - macromolecule metabolic process	6.12311e-42	7.87098e-40	1.7531	Over	11985	4562	523	349	BraA01g02360R | BraA01g07520R | BraA01g08620R | BraA01g09180R | BraA01g09700R | BraA01g10390R | BraA01g10600R | BraA01g11040R | BraA01g14270R | BraA01g15470R | BraA01g16110R | BraA01g16790R | BraA01g20430R | BraA01g23020R | BraA01g29080R | BraA01g30550R | BraA01g32210R | BraA01g34480R | BraA01g34690R | BraA01g34910R | BraA01g34940R | BraA01g35670R | BraA01g35830R | BraA02g01620R | BraA02g01720R |…
GO:0044249 - cellular biosynthetic process	2.25706e-36	2.65957e-34	1.94034	Over	11985	3236	523	274	BraA01g02360R | BraA01g07520R | BraA01g08620R | BraA01g09180R | BraA01g10600R | BraA01g14270R | BraA01g16110R | BraA01g16790R | BraA01g20430R | BraA01g23020R | BraA01g30550R | BraA01g32210R | BraA01g34480R | BraA01g34690R | BraA01g35830R | BraA02g01620R | BraA02g01720R | BraA02g02100R | BraA02g02490R | BraA02g02990R | BraA02g05530R | BraA02g09490R | BraA02g09670R | BraA02g10100R | BraA02g12480R |…
GO:1901576 - organic substance biosynthetic process	2.96577e-35	3.22584e-33	1.91023	Over	11985	3299	523	275	BraA01g02360R | BraA01g07520R | BraA01g08620R | BraA01g09180R | BraA01g10600R | BraA01g14270R | BraA01g16110R | BraA01g16790R | BraA01g20430R | BraA01g23020R | BraA01g30550R | BraA01g32210R | BraA01g34480R | BraA01g34690R | BraA01g35830R | BraA02g01620R | BraA02g01720R | BraA02g02100R | BraA02g02490R | BraA02g02990R | BraA02g05530R | BraA02g09490R | BraA02g09670R | BraA02g10100R | BraA02g12480R |…
GO:0009058 - biosynthetic process	1.74342e-31	1.76085e-29	1.8206	Over	11985	3474	523	276	BraA01g02360R | BraA01g07520R | BraA01g08620R | BraA01g09180R | BraA01g10600R | BraA01g14270R | BraA01g16110R | BraA01g16790R | BraA01g20430R | BraA01g23020R | BraA01g30550R | BraA01g32210R | BraA01g34480R | BraA01g34690R | BraA01g35830R | BraA02g01620R | BraA02g01720R | BraA02g02100R | BraA02g02490R | BraA02g02990R | BraA02g05530R | BraA02g09490R | BraA02g09670R | BraA02g10100R | BraA02g12480R |…
GO:0006364 - rRNA processing	2.65459e-29	2.50239e-27	9.44984	Over	11985	97	523	40	BraA01g09180R | BraA01g11040R | BraA01g29080R | BraA02g02100R | BraA02g07070R | BraA02g14140R | BraA02g28210R | BraA03g03230R | BraA03g07000R | BraA03g22480R | BraA03g28000R | BraA03g28060R | BraA03g38560R | BraA03g39740R | BraA03g42800R | BraA04g02500R | BraA04g05180R | BraA04g17370R | BraA05g01470R | BraA05g05640R | BraA06g11300R | BraA06g14230R | BraA07g09880R | BraA07g27580R | BraA07g35110R |…
GO:0044238 - primary metabolic process	4.78489e-29	4.22865e-27	1.47582	Over	11985	5916	523	381	BraA01g02360R | BraA01g07520R | BraA01g08620R | BraA01g09180R | BraA01g09700R | BraA01g10390R | BraA01g10600R | BraA01g11040R | BraA01g14270R | BraA01g15470R | BraA01g16110R | BraA01g16790R | BraA01g19920R | BraA01g20430R | BraA01g23020R | BraA01g29080R | BraA01g30550R | BraA01g32210R | BraA01g34480R | BraA01g34690R | BraA01g34910R | BraA01g34940R | BraA01g35670R | BraA01g35830R | BraA02g01620R |…
GO:0016072 - rRNA metabolic process	2.79213e-28	2.32239e-26	8.98662	Over	11985	102	523	40	BraA01g09180R | BraA01g11040R | BraA01g29080R | BraA02g02100R | BraA02g07070R | BraA02g14140R | BraA02g28210R | BraA03g03230R | BraA03g07000R | BraA03g22480R | BraA03g28000R | BraA03g28060R | BraA03g38560R | BraA03g39740R | BraA03g42800R | BraA04g02500R | BraA04g05180R | BraA04g17370R | BraA05g01470R | BraA05g05640R | BraA06g11300R | BraA06g14230R | BraA07g09880R | BraA07g27580R | BraA07g35110R |…
GO:0034660 - ncRNA metabolic process	1.44731e-27	1.13694e-25	6.10322	Over	11985	199	523	53	BraA01g09180R | BraA01g11040R | BraA01g29080R | BraA01g32210R | BraA02g02100R | BraA02g07070R | BraA02g14140R | BraA02g28210R | BraA02g38000R | BraA02g42260R | BraA03g03230R | BraA03g07000R | BraA03g07570R | BraA03g12860R | BraA03g22480R | BraA03g28000R | BraA03g28060R | BraA03g38560R | BraA03g39740R | BraA03g42800R | BraA03g45100R | BraA04g02500R | BraA04g05180R | BraA04g09090R | BraA04g17370R |…
GO:0022618 - ribonucleoprotein complex assembly	1.64675e-26	1.22553e-24	10.2518	Over	11985	76	523	34	BraA01g13680R | BraA01g20430R | BraA01g29080R | BraA02g02100R | BraA02g29740R | BraA03g20570R | BraA03g27210R | BraA03g30390R | BraA03g41030R | BraA03g45100R | BraA03g45570R | BraA03g47600R | BraA04g05180R | BraA04g05530R | BraA04g17370R | BraA04g17750R | BraA05g36720R | BraA06g10300R | BraA06g11300R | BraA06g23750R | BraA06g41010R | BraA07g10800R | BraA07g12340R | BraA07g19080R | BraA07g19520R |…
GO:0071840 - cellular component organization or biogenesis	3.37276e-26	2.38454e-24	2.21266	Over	11985	1771	523	171	BraA01g08620R | BraA01g09180R | BraA01g09700R | BraA01g10390R | BraA01g10600R | BraA01g11040R | BraA01g11090R | BraA01g13680R | BraA01g16110R | BraA01g20430R | BraA01g25630R | BraA01g29080R | BraA01g35830R | BraA02g01620R | BraA02g02100R | BraA02g02990R | BraA02g04220R | BraA02g07070R | BraA02g09490R | BraA02g09670R | BraA02g13770R | BraA02g14140R | BraA02g20270R | BraA02g28210R | BraA02g29040R |…
GO:0071826 - ribonucleoprotein complex subunit organization	4.8194e-26	3.24506e-24	9.98897	Over	11985	78	523	34	BraA01g13680R | BraA01g20430R | BraA01g29080R | BraA02g02100R | BraA02g29740R | BraA03g20570R | BraA03g27210R | BraA03g30390R | BraA03g41030R | BraA03g45100R | BraA03g45570R | BraA03g47600R | BraA04g05180R | BraA04g05530R | BraA04g17370R | BraA04g17750R | BraA05g36720R | BraA06g10300R | BraA06g11300R | BraA06g23750R | BraA06g41010R | BraA07g10800R | BraA07g12340R | BraA07g19080R | BraA07g19520R |…
GO:0034470 - ncRNA processing	4.69674e-25	3.01872e-23	6.7671	Over	11985	149	523	44	BraA01g09180R | BraA01g11040R | BraA01g29080R | BraA02g02100R | BraA02g07070R | BraA02g14140R | BraA02g28210R | BraA02g38000R | BraA03g03230R | BraA03g07000R | BraA03g07570R | BraA03g22480R | BraA03g28000R | BraA03g28060R | BraA03g38560R | BraA03g39740R | BraA03g42800R | BraA03g45100R | BraA04g02500R | BraA04g05180R | BraA04g17370R | BraA04g30960R | BraA05g01470R | BraA05g05640R | BraA06g11300R |…
GO:0042273 - ribosomal large subunit biogenesis	6.32392e-25	3.88784e-23	16.4708	Over	11985	32	523	23	BraA01g29080R | BraA02g07070R | BraA02g14140R | BraA03g07000R | BraA03g20570R | BraA03g39740R | BraA03g41030R | BraA03g47600R | BraA04g05180R | BraA04g05530R | BraA04g17490R | BraA05g05640R | BraA06g10300R | BraA06g23750R | BraA07g10800R | BraA07g12340R | BraA07g19520R | BraA07g28580R | BraA08g29660R | BraA09g02000R | BraA09g59720R | BraA10g13110R | BraA10g22510R
GO:0042255 - ribosome assembly	1.04351e-24	6.148e-23	15.2772	Over	11985	36	523	24	BraA01g13680R | BraA01g29080R | BraA02g02100R | BraA03g20570R | BraA03g41030R | BraA03g45100R | BraA03g45570R | BraA03g47600R | BraA04g05180R | BraA04g05530R | BraA04g17370R | BraA06g10300R | BraA06g11300R | BraA06g23750R | BraA07g10800R | BraA07g12340R | BraA07g19080R | BraA07g19520R | BraA07g27580R | BraA07g28580R | BraA07g35110R | BraA08g29660R | BraA09g02000R | BraA09g64210R
GO:0071704 - organic substance metabolic process	3.55529e-23	2.01087e-21	1.38961	Over	11985	6349	523	385	BraA01g02360R | BraA01g07520R | BraA01g08620R | BraA01g09180R | BraA01g09700R | BraA01g10390R | BraA01g10600R | BraA01g11040R | BraA01g14270R | BraA01g15470R | BraA01g16110R | BraA01g16790R | BraA01g19920R | BraA01g20430R | BraA01g23020R | BraA01g29080R | BraA01g30550R | BraA01g32210R | BraA01g34480R | BraA01g34690R | BraA01g34910R | BraA01g34940R | BraA01g35670R | BraA01g35830R | BraA02g01620R |…
GO:0044237 - cellular metabolic process	4.87507e-23	2.65129e-21	1.40271	Over	11985	6159	523	377	BraA01g02360R | BraA01g07520R | BraA01g08620R | BraA01g09180R | BraA01g09700R | BraA01g10390R | BraA01g10600R | BraA01g11040R | BraA01g14270R | BraA01g15470R | BraA01g16110R | BraA01g16790R | BraA01g20430R | BraA01g23020R | BraA01g29080R | BraA01g30550R | BraA01g32210R | BraA01g34480R | BraA01g34690R | BraA01g34910R | BraA01g34940R | BraA01g35670R | BraA01g35830R | BraA02g01620R | BraA02g01720R |…
GO:0044699 - single-organism process	2.67526e-19	1.40104e-17	0.651238	Under	11985	6545	523	186	BraA01g07520R | BraA01g09180R | BraA01g09700R | BraA01g10390R | BraA01g11040R | BraA01g15470R | BraA01g19920R | BraA01g20430R | BraA01g25630R | BraA01g27050R | BraA01g32210R | BraA01g34480R | BraA01g35830R | BraA02g04220R | BraA02g04530R | BraA02g05590R | BraA02g06240R | BraA02g07390R | BraA02g10100R | BraA02g14140R | BraA02g19760R | BraA02g21650R | BraA02g22730R | BraA02g30810R | BraA02g38000R |…
GO:0044763 - single-organism cellular process	6.79023e-19	3.42906e-17	0.567519	Under	11985	5007	523	124	BraA01g07520R | BraA01g09180R | BraA01g09700R | BraA01g10390R | BraA01g15470R | BraA01g20430R | BraA01g25630R | BraA01g27050R | BraA01g32210R | BraA01g34480R | BraA01g35830R | BraA02g04220R | BraA02g04530R | BraA02g05590R | BraA02g19760R | BraA02g21650R | BraA02g38000R | BraA02g38130R | BraA02g38490R | BraA02g41350R | BraA02g42260R | BraA02g44550R | BraA03g03200R | BraA03g03230R | BraA03g04990R |…
GO:0070925 - organelle assembly	1.14726e-18	5.5939e-17	9.39175	Over	11985	61	523	25	BraA01g13680R | BraA01g29080R | BraA02g02100R | BraA03g20570R | BraA03g41030R | BraA03g45100R | BraA03g45570R | BraA03g47600R | BraA04g05180R | BraA04g05530R | BraA04g17370R | BraA06g10300R | BraA06g11300R | BraA06g23750R | BraA06g33500R | BraA07g10800R | BraA07g12340R | BraA07g19080R | BraA07g19520R | BraA07g27580R | BraA07g28580R | BraA07g35110R | BraA08g29660R | BraA09g02000R | BraA09g64210R
GO:0006413 - translational initiation	4.4006e-18	2.07415e-16	7.73065	Over	11985	83	523	28	BraA01g02360R | BraA01g30550R | BraA02g10100R | BraA02g29740R | BraA02g38710R | BraA03g18030R | BraA03g20790R | BraA03g27210R | BraA03g30390R | BraA03g35800R | BraA03g55310R | BraA04g04040R | BraA04g05180R | BraA04g17750R | BraA04g24050R | BraA04g30960R | BraA05g06390R | BraA05g06640R | BraA05g33830R | BraA06g41010R | BraA08g01930R | BraA08g01950R | BraA08g12740R | BraA09g20550R | BraA09g26690R |…
GO:0034622 - cellular macromolecular complex assembly	2.95043e-16	1.34578e-14	4.10842	Over	11985	251	523	45	BraA01g09700R | BraA01g11090R | BraA01g13680R | BraA01g20430R | BraA01g29080R | BraA02g02100R | BraA02g09490R | BraA02g29740R | BraA03g20570R | BraA03g27210R | BraA03g30390R | BraA03g41030R | BraA03g45100R | BraA03g45570R | BraA03g47600R | BraA04g02490R | BraA04g05180R | BraA04g05530R | BraA04g17370R | BraA04g17750R | BraA05g15220R | BraA05g23180R | BraA05g36720R | BraA05g38150R | BraA06g10300R |…
GO:0000027 - ribosomal large subunit assembly	3.64956e-15	1.61265e-13	17.5239	Over	11985	17	523	13	BraA01g29080R | BraA03g20570R | BraA03g41030R | BraA03g47600R | BraA04g05530R | BraA06g10300R | BraA06g23750R | BraA07g10800R | BraA07g12340R | BraA07g19520R | BraA07g28580R | BraA08g29660R | BraA09g02000R
GO:0065003 - macromolecular complex assembly	5.16114e-15	2.21147e-13	3.6183	Over	11985	304	523	48	BraA01g09700R | BraA01g11090R | BraA01g13680R | BraA01g20430R | BraA01g29080R | BraA02g02100R | BraA02g09490R | BraA02g29740R | BraA03g20570R | BraA03g27210R | BraA03g30390R | BraA03g41030R | BraA03g45100R | BraA03g45570R | BraA03g47600R | BraA04g02490R | BraA04g05180R | BraA04g05530R | BraA04g17370R | BraA04g17750R | BraA05g15220R | BraA05g23180R | BraA05g34350R | BraA05g36720R | BraA05g38150R |…
GO:0008152 - metabolic process	1.98468e-14	8.25393e-13	1.25619	Over	11985	7224	523	396	BraA01g02360R | BraA01g07520R | BraA01g08620R | BraA01g09180R | BraA01g09700R | BraA01g10390R | BraA01g10600R | BraA01g11040R | BraA01g13610R | BraA01g14270R | BraA01g15470R | BraA01g16110R | BraA01g16790R | BraA01g19920R | BraA01g20430R | BraA01g23020R | BraA01g29080R | BraA01g30550R | BraA01g32210R | BraA01g34480R | BraA01g34690R | BraA01g34910R | BraA01g34940R | BraA01g35670R | BraA01g35830R |…
GO:0044710 - single-organism metabolic process	3.04365e-14	1.22963e-12	0.485822	Under	11985	3066	523	65	BraA01g09180R | BraA01g09700R | BraA01g15470R | BraA01g19920R | BraA01g32210R | BraA01g35830R | BraA02g07390R | BraA02g19760R | BraA02g21650R | BraA02g38000R | BraA02g41350R | BraA02g42260R | BraA03g04990R | BraA03g07830R | BraA03g12860R | BraA03g20040R | BraA03g24500R | BraA03g27140R | BraA03g30030R | BraA03g56070R | BraA04g07420R | BraA04g09090R | BraA04g11900R | BraA04g11960R | BraA04g19410R |…
GO:0006796 - phosphate-containing compound metabolic process	2.28316e-13	8.96774e-12	0.240677	Under	11985	1333	523	14	BraA01g35830R | BraA03g20040R | BraA03g30030R | BraA04g16420R | BraA05g37950R | BraA07g04740R | BraA07g26820R | BraA07g37680R | BraA08g01410R | BraA08g32000R | BraA08g32290R | BraA09g31240R | BraA09g46320R | BraA10g23960R
GO:0006793 - phosphorus metabolic process	4.99849e-13	1.91023e-11	0.254244	Under	11985	1352	523	15	BraA01g35830R | BraA03g20040R | BraA03g30030R | BraA04g16420R | BraA05g37950R | BraA07g04740R | BraA07g26820R | BraA07g37680R | BraA08g01410R | BraA08g32000R | BraA08g32290R | BraA09g31240R | BraA09g33470R | BraA09g46320R | BraA10g23960R
GO:0022607 - cellular component assembly	6.00102e-13	2.23301e-11	3.02443	Over	11985	394	523	52	BraA01g09700R | BraA01g11090R | BraA01g13680R | BraA01g20430R | BraA01g29080R | BraA02g02100R | BraA02g09490R | BraA02g29740R | BraA03g20570R | BraA03g27210R | BraA03g30390R | BraA03g41030R | BraA03g45100R | BraA03g45570R | BraA03g47600R | BraA04g02490R | BraA04g05180R | BraA04g05530R | BraA04g17370R | BraA04g17750R | BraA05g15220R | BraA05g23180R | BraA05g34350R | BraA05g36720R | BraA05g38150R |…
GO:0009987 - cellular process	9.15513e-13	3.31932e-11	1.20946	Over	11985	7901	523	417	BraA01g02360R | BraA01g07520R | BraA01g08620R | BraA01g09180R | BraA01g09700R | BraA01g10390R | BraA01g10600R | BraA01g11040R | BraA01g11090R | BraA01g13680R | BraA01g14270R | BraA01g15470R | BraA01g16110R | BraA01g16790R | BraA01g20430R | BraA01g23020R | BraA01g25630R | BraA01g27050R | BraA01g29080R | BraA01g30550R | BraA01g32210R | BraA01g34480R | BraA01g34690R | BraA01g34910R | BraA01g34940R |…
GO:0042274 - ribosomal small subunit biogenesis	1.606e-12	5.67719e-11	14.4732	Over	11985	19	523	12	BraA02g02100R | BraA03g22480R | BraA04g02500R | BraA04g17370R | BraA06g11300R | BraA07g19080R | BraA07g27580R | BraA07g35110R | BraA08g17360R | BraA08g28500R | BraA09g64210R | BraA10g21590R
GO:0043933 - macromolecular complex subunit organization	1.42618e-11	4.91857e-10	2.58022	Over	11985	524	523	59	BraA01g09180R | BraA01g09700R | BraA01g11090R | BraA01g13680R | BraA01g20430R | BraA01g29080R | BraA02g02100R | BraA02g09490R | BraA02g29740R | BraA03g17940R | BraA03g20570R | BraA03g27210R | BraA03g30390R | BraA03g41030R | BraA03g45100R | BraA03g45570R | BraA03g47600R | BraA04g02490R | BraA04g05180R | BraA04g05530R | BraA04g17370R | BraA04g17750R | BraA04g19410R | BraA05g15220R | BraA05g23180R |…
GO:0006464 - cellular protein modification process	3.92046e-11	1.28919e-09	0.322986	Under	11985	1419	523	20	BraA01g09180R | BraA01g35830R | BraA03g11940R | BraA03g12160R | BraA03g37180R | BraA04g01550R | BraA04g16420R | BraA05g10800R | BraA06g20860R | BraA06g25160R | BraA06g25960R | BraA06g25980R | BraA07g02050R | BraA07g23560R | BraA07g37680R | BraA08g19910R | BraA08g32290R | BraA09g41230R | BraA09g49770R | BraA10g15430R
GO:0036211 - protein modification process	3.92046e-11	1.28919e-09	0.322986	Under	11985	1419	523	20	BraA01g09180R | BraA01g35830R | BraA03g11940R | BraA03g12160R | BraA03g37180R | BraA04g01550R | BraA04g16420R | BraA05g10800R | BraA06g20860R | BraA06g25160R | BraA06g25960R | BraA06g25980R | BraA07g02050R | BraA07g23560R | BraA07g37680R | BraA08g19910R | BraA08g32290R | BraA09g41230R | BraA09g49770R | BraA10g15430R
GO:0000460 - maturation of 5.8S rRNA	1.08113e-10	3.47437e-09	20.3697	Over	11985	9	523	8	BraA02g07070R | BraA04g05180R | BraA04g17370R | BraA07g27580R | BraA07g35110R | BraA09g02000R | BraA09g17670R | BraA10g22510R
GO:0006468 - protein phosphorylation	2.46613e-10	7.74914e-09	0.0742816	Under	11985	617	523	2	BraA04g16420R | BraA07g37680R
GO:0000028 - ribosomal small subunit assembly	2.89932e-10	8.91225e-09	22.9159	Over	11985	7	523	7	BraA02g02100R | BraA04g17370R | BraA06g11300R | BraA07g19080R | BraA07g27580R | BraA07g35110R | BraA09g64210R
GO:0016310 - phosphorylation	8.75744e-10	2.63469e-08	0.209997	Under	11985	873	523	8	BraA03g30030R | BraA04g16420R | BraA05g37950R | BraA07g37680R | BraA08g01410R | BraA08g32000R | BraA09g31240R | BraA09g46320R
GO:0065007 - biological regulation	1.13334e-09	3.33864e-08	0.622956	Under	11985	3605	523	98	BraA01g02360R | BraA01g07520R | BraA01g09180R | BraA01g20430R | BraA01g27050R | BraA01g30550R | BraA01g34480R | BraA01g34910R | BraA02g05530R | BraA02g05590R | BraA02g09490R | BraA02g19610R | BraA02g19760R | BraA02g38130R | BraA02g44550R | BraA03g03200R | BraA03g07000R | BraA03g10570R | BraA03g27140R | BraA03g30390R | BraA03g31080R | BraA03g31320R | BraA03g32590R | BraA03g35800R | BraA03g37260R |…
GO:0000470 - maturation of LSU-rRNA	1.83355e-09	5.2911e-08	16.6661	Over	11985	11	523	8	BraA02g07070R | BraA02g14140R | BraA03g07000R | BraA04g05180R | BraA05g05640R | BraA09g02000R | BraA10g13110R | BraA10g22510R
GO:0006913 - nucleocytoplasmic transport	3.01708e-09	8.36499e-08	5.12237	Over	11985	85	523	19	BraA01g07520R | BraA03g41030R | BraA03g45830R | BraA03g50490R | BraA04g05180R | BraA04g17370R | BraA06g37270R | BraA07g10800R | BraA07g27580R | BraA07g30210R | BraA07g32570R | BraA07g35110R | BraA08g11810R | BraA08g33210R | BraA09g35160R | BraA09g59720R | BraA09g62970R | BraA10g12440R | BraA10g19330R
GO:0051169 - nuclear transport	3.01708e-09	8.36499e-08	5.12237	Over	11985	85	523	19	BraA01g07520R | BraA03g41030R | BraA03g45830R | BraA03g50490R | BraA04g05180R | BraA04g17370R | BraA06g37270R | BraA07g10800R | BraA07g27580R | BraA07g30210R | BraA07g32570R | BraA07g35110R | BraA08g11810R | BraA08g33210R | BraA09g35160R | BraA09g59720R | BraA09g62970R | BraA10g12440R | BraA10g19330R
GO:0051716 - cellular response to stimulus	8.58109e-09	2.3334e-07	0.468705	Under	11985	1809	523	37	BraA01g07520R | BraA01g09700R | BraA01g15470R | BraA01g20430R | BraA01g27050R | BraA01g34480R | BraA02g05590R | BraA03g27140R | BraA03g50490R | BraA04g05180R | BraA04g11960R | BraA04g16420R | BraA04g19410R | BraA05g28000R | BraA06g10300R | BraA06g13550R | BraA07g19520R | BraA07g25140R | BraA07g28060R | BraA07g29060R | BraA07g37680R | BraA08g01410R | BraA08g12490R | BraA08g27830R | BraA08g28260R |…
GO:0030490 - maturation of SSU-rRNA	1.32309e-08	3.5299e-07	14.1021	Over	11985	13	523	8	BraA02g02100R | BraA03g22480R | BraA04g17370R | BraA06g11300R | BraA07g27580R | BraA07g35110R | BraA08g28500R | BraA10g21590R
GO:0050794 - regulation of cellular process	1.45195e-08	3.80195e-07	0.607043	Under	11985	3020	523	80	BraA01g02360R | BraA01g07520R | BraA01g09180R | BraA01g20430R | BraA01g27050R | BraA01g34480R | BraA02g05530R | BraA02g05590R | BraA02g09490R | BraA02g19760R | BraA02g38130R | BraA02g44550R | BraA03g03200R | BraA03g07000R | BraA03g10570R | BraA03g27140R | BraA03g30390R | BraA03g31320R | BraA03g32590R | BraA03g37260R | BraA03g45100R | BraA03g50490R | BraA03g55310R | BraA03g57680R | BraA04g08100R |…
GO:0006952 - defense response	2.00497e-08	5.15459e-07	0.27731	Under	11985	909	523	11	BraA03g27140R | BraA03g27540R | BraA03g37180R | BraA04g03030R | BraA06g04420R | BraA06g37980R | BraA09g14680R | BraA09g33670R | BraA09g36370R | BraA09g54380R | BraA10g06750R
GO:0009605 - response to external stimulus	2.31288e-08	5.84002e-07	0.315459	Under	11985	1017	523	14	BraA01g02360R | BraA01g35830R | BraA03g27140R | BraA03g27540R | BraA03g38010R | BraA03g41570R | BraA06g37980R | BraA08g12740R | BraA09g14680R | BraA09g30220R | BraA09g33670R | BraA09g36370R | BraA09g54380R | BraA09g60940R
GO:0007154 - cell communication	2.52156e-08	6.25523e-07	0.418114	Under	11985	1425	523	26	BraA01g07520R | BraA01g27050R | BraA01g34480R | BraA02g05590R | BraA03g27140R | BraA03g28060R | BraA03g50490R | BraA04g16420R | BraA05g28000R | BraA06g13550R | BraA07g19520R | BraA07g25140R | BraA07g29060R | BraA07g37680R | BraA08g28260R | BraA09g14500R | BraA09g24680R | BraA09g29440R | BraA09g33670R | BraA09g36370R | BraA09g45620R | BraA09g54380R | BraA09g54990R | BraA10g06750R | BraA10g12440R |…
GO:0050789 - regulation of biological process	2.88031e-08	7.022e-07	0.640146	Under	11985	3365	523	94	BraA01g02360R | BraA01g07520R | BraA01g09180R | BraA01g20430R | BraA01g27050R | BraA01g30550R | BraA01g34480R | BraA01g34910R | BraA02g05530R | BraA02g05590R | BraA02g09490R | BraA02g19760R | BraA02g38130R | BraA02g44550R | BraA03g03200R | BraA03g07000R | BraA03g10570R | BraA03g27140R | BraA03g30390R | BraA03g31080R | BraA03g31320R | BraA03g32590R | BraA03g35800R | BraA03g37260R | BraA03g38560R |…
GO:0055114 - oxidation-reduction process	3.24885e-08	7.78624e-07	0.318592	Under	11985	1007	523	14	BraA03g24500R | BraA04g11900R | BraA04g29160R | BraA05g07890R | BraA05g14460R | BraA05g17700R | BraA05g37950R | BraA06g11230R | BraA08g06560R | BraA09g09820R | BraA09g33470R | BraA09g47720R | BraA10g21940R | BraA10g23960R
GO:0002181 - cytoplasmic translation	4.52849e-08	1.06721e-06	19.6422	Over	11985	7	523	6	BraA02g29740R | BraA03g27210R | BraA06g41010R | BraA07g03350R | BraA09g20550R | BraA09g26690R
GO:0006414 - translational elongation	7.94586e-08	1.84188e-06	7.63862	Over	11985	33	523	11	BraA03g24440R | BraA03g29250R | BraA04g24820R | BraA05g35510R | BraA07g16910R | BraA08g22840R | BraA08g31980R | BraA09g56800R | BraA09g61860R | BraA10g01720R | BraA10g14560R
GO:0000462 - maturation of SSU-rRNA from tricistronic rRNA transcript (SSU-rRNA, 5.8S rRNA, LSU-rRNA)	8.20575e-08	1.87144e-06	14.5828	Over	11985	11	523	7	BraA03g22480R | BraA04g17370R | BraA06g11300R | BraA07g27580R | BraA07g35110R | BraA08g28500R | BraA10g21590R
GO:0065008 - regulation of biological quality	1.30788e-07	2.93545e-06	0.229487	Under	11985	699	523	7	BraA02g19610R | BraA05g07890R | BraA05g25100R | BraA06g37980R | BraA07g19080R | BraA09g13130R | BraA10g15560R
GO:0000466 - maturation of 5.8S rRNA from tricistronic rRNA transcript (SSU-rRNA, 5.8S rRNA, LSU-rRNA)	1.55365e-07	3.37978e-06	22.9159	Over	11985	5	523	5	BraA02g07070R | BraA04g17370R | BraA07g27580R | BraA07g35110R | BraA10g22510R
GO:0002183 - cytoplasmic translational initiation	1.55365e-07	3.37978e-06	22.9159	Over	11985	5	523	5	BraA02g29740R | BraA03g27210R | BraA06g41010R | BraA09g20550R | BraA09g26690R
GO:0050896 - response to stimulus	1.65934e-07	3.55501e-06	0.707952	Under	11985	4208	523	130	BraA01g01860R | BraA01g02360R | BraA01g07520R | BraA01g09700R | BraA01g10390R | BraA01g15470R | BraA01g16110R | BraA01g16790R | BraA01g20430R | BraA01g26950R | BraA01g27050R | BraA01g30550R | BraA01g34480R | BraA01g35830R | BraA02g04220R | BraA02g05590R | BraA02g06240R | BraA02g10150R | BraA02g19760R | BraA02g38130R | BraA02g38710R | BraA03g04990R | BraA03g12860R | BraA03g16620R | BraA03g19140R |…
GO:0000154 - rRNA modification	1.89531e-07	3.99996e-06	13.3676	Over	11985	12	523	7	BraA01g09180R | BraA02g14140R | BraA05g01470R | BraA08g01110R | BraA08g19910R | BraA09g13130R | BraA10g13110R
GO:0023052 - signaling	3.47918e-07	7.23464e-06	0.432375	Under	11985	1272	523	24	BraA01g07520R | BraA01g27050R | BraA01g34480R | BraA02g05590R | BraA03g27140R | BraA03g50490R | BraA04g16420R | BraA05g28000R | BraA06g13550R | BraA07g19520R | BraA07g25140R | BraA07g29060R | BraA07g37680R | BraA08g28260R | BraA09g14500R | BraA09g29440R | BraA09g33670R | BraA09g36370R | BraA09g45620R | BraA09g54380R | BraA09g54990R | BraA10g06750R | BraA10g12440R | BraA10g20690R
GO:0044700 - single organism signaling	3.58219e-07	7.3409e-06	0.432715	Under	11985	1271	523	24	BraA01g07520R | BraA01g27050R | BraA01g34480R | BraA02g05590R | BraA03g27140R | BraA03g50490R | BraA04g16420R | BraA05g28000R | BraA06g13550R | BraA07g19520R | BraA07g25140R | BraA07g29060R | BraA07g37680R | BraA08g28260R | BraA09g14500R | BraA09g29440R | BraA09g33670R | BraA09g36370R | BraA09g45620R | BraA09g54380R | BraA09g54990R | BraA10g06750R | BraA10g12440R | BraA10g20690R
GO:0043628 - ncRNA 3'-end processing	3.95215e-07	7.98334e-06	12.3393	Over	11985	13	523	7	BraA01g09180R | BraA01g11040R | BraA04g17370R | BraA07g27580R | BraA07g35110R | BraA08g19910R | BraA09g17670R
GO:0044711 - single-organism biosynthetic process	4.13422e-07	8.13782e-06	0.460621	Under	11985	1393	523	28	BraA01g35830R | BraA02g21650R | BraA02g41350R | BraA03g04990R | BraA03g07830R | BraA03g20040R | BraA03g30030R | BraA03g56070R | BraA04g11900R | BraA05g14460R | BraA05g23180R | BraA05g32940R | BraA05g33500R | BraA07g04740R | BraA07g26820R | BraA07g27180R | BraA07g35710R | BraA08g01410R | BraA08g22840R | BraA08g32000R | BraA09g13130R | BraA09g14500R | BraA09g31240R | BraA09g33470R | BraA09g39010R |…
GO:0007165 - signal transduction	4.14373e-07	8.13782e-06	0.434424	Under	11985	1266	523	24	BraA01g07520R | BraA01g27050R | BraA01g34480R | BraA02g05590R | BraA03g27140R | BraA03g50490R | BraA04g16420R | BraA05g28000R | BraA06g13550R | BraA07g19520R | BraA07g25140R | BraA07g29060R | BraA07g37680R | BraA08g28260R | BraA09g14500R | BraA09g29440R | BraA09g33670R | BraA09g36370R | BraA09g45620R | BraA09g54380R | BraA09g54990R | BraA10g06750R | BraA10g12440R | BraA10g20690R
GO:0006417 - regulation of translation	1.07006e-06	2.0727e-05	4.71797	Over	11985	68	523	14	BraA01g02360R | BraA03g30390R | BraA03g55310R | BraA04g17750R | BraA04g30960R | BraA05g28980R | BraA06g04180R | BraA06g13550R | BraA06g41010R | BraA08g12740R | BraA08g28260R | BraA09g20550R | BraA09g51390R | BraA09g54990R
GO:0006629 - lipid metabolic process	1.87357e-06	3.58003e-05	0.293375	Under	11985	703	523	9	BraA01g19920R | BraA02g07390R | BraA03g07830R | BraA03g20040R | BraA03g30030R | BraA03g56070R | BraA05g14460R | BraA09g33470R | BraA10g21940R
GO:0010501 - RNA secondary structure unwinding	2.45276e-06	4.62427e-05	7.11182	Over	11985	29	523	9	BraA01g30550R | BraA02g44390R | BraA03g35800R | BraA03g38560R | BraA03g42800R | BraA08g01930R | BraA08g01950R | BraA09g07860R | BraA09g58040R
GO:0031125 - rRNA 3'-end processing	3.03189e-06	5.64091e-05	16.3685	Over	11985	7	523	5	BraA01g11040R | BraA04g17370R | BraA07g27580R | BraA07g35110R | BraA09g17670R
GO:0001101 - response to acid chemical	3.1711e-06	5.82328e-05	0.402448	Under	11985	968	523	17	BraA01g27050R | BraA01g35830R | BraA03g27140R | BraA03g58420R | BraA04g05180R | BraA04g16420R | BraA05g28000R | BraA06g13550R | BraA06g25160R | BraA07g37680R | BraA08g06560R | BraA08g28260R | BraA09g33670R | BraA09g36370R | BraA09g45620R | BraA09g54990R | BraA10g30710R
GO:0042256 - mature ribosome assembly	3.58656e-06	6.5018e-05	22.9159	Over	11985	4	523	4	BraA04g05180R | BraA04g17370R | BraA07g27580R | BraA07g35110R
GO:1901700 - response to oxygen-containing compound	3.71198e-06	6.64398e-05	0.482628	Under	11985	1282	523	27	BraA01g27050R | BraA01g35830R | BraA03g20790R | BraA03g27140R | BraA03g37180R | BraA03g57680R | BraA03g58420R | BraA04g05180R | BraA04g16420R | BraA05g06640R | BraA05g28000R | BraA06g11230R | BraA06g13550R | BraA06g25160R | BraA07g25140R | BraA07g37680R | BraA08g01410R | BraA08g06560R | BraA08g28260R | BraA09g29440R | BraA09g33670R | BraA09g36370R | BraA09g45620R | BraA09g54380R | BraA09g54990R |…
GO:0006950 - response to stress	4.13983e-06	7.31714e-05	0.624438	Under	11985	2312	523	63	BraA01g09700R | BraA01g10390R | BraA01g15470R | BraA01g16790R | BraA01g20430R | BraA02g04220R | BraA02g06240R | BraA02g10150R | BraA02g38130R | BraA02g38710R | BraA03g16620R | BraA03g20570R | BraA03g24440R | BraA03g27140R | BraA03g27540R | BraA03g34830R | BraA03g37180R | BraA03g38560R | BraA03g44030R | BraA03g52370R | BraA04g03030R | BraA04g04040R | BraA04g04920R | BraA04g05530R | BraA04g11960R |…
GO:0043412 - macromolecule modification	4.50457e-06	7.86354e-05	0.538341	Under	11985	1575	523	37	BraA01g09180R | BraA01g34940R | BraA01g35830R | BraA02g14140R | BraA02g38000R | BraA03g08690R | BraA03g11940R | BraA03g12160R | BraA03g37180R | BraA04g01550R | BraA04g16420R | BraA04g30960R | BraA05g01470R | BraA05g10800R | BraA05g12840R | BraA05g23180R | BraA05g28020R | BraA06g20860R | BraA06g25160R | BraA06g25960R | BraA06g25980R | BraA06g38120R | BraA06g40660R | BraA07g02050R | BraA07g23560R |…
GO:0009793 - embryo development ending in seed dormancy	5.19828e-06	8.96387e-05	2.17701	Over	11985	400	523	38	BraA01g07520R | BraA01g20430R | BraA01g35830R | BraA02g10100R | BraA02g30810R | BraA02g44550R | BraA03g03200R | BraA03g12860R | BraA03g17900R | BraA03g20790R | BraA03g28060R | BraA03g32590R | BraA03g50490R | BraA03g56070R | BraA04g05180R | BraA05g06640R | BraA05g28020R | BraA05g33760R | BraA05g37230R | BraA06g25160R | BraA06g39450R | BraA07g03350R | BraA08g24260R | BraA08g24270R | BraA08g28500R |…
GO:0009607 - response to biotic stimulus	6.71797e-06	0.000114448	0.355744	Under	11985	773	523	12	BraA01g02360R | BraA03g27140R | BraA03g27540R | BraA03g38010R | BraA06g37980R | BraA08g12740R | BraA09g14680R | BraA09g30220R | BraA09g33670R | BraA09g36370R | BraA09g54380R | BraA09g60940R
GO:0016482 - cytoplasmic transport	7.03694e-06	0.000118455	2.55673	Over	11985	242	523	27	BraA01g07520R | BraA01g10390R | BraA01g25630R | BraA03g41030R | BraA03g45830R | BraA03g50490R | BraA03g52370R | BraA04g05180R | BraA04g17370R | BraA06g24070R | BraA06g37270R | BraA06g41260R | BraA07g10800R | BraA07g12810R | BraA07g27580R | BraA07g30210R | BraA07g31220R | BraA07g32570R | BraA07g35110R | BraA08g11810R | BraA08g33210R | BraA09g15700R | BraA09g35160R | BraA09g59720R | BraA09g62970R |…
GO:0001731 - formation of translation preinitiation complex	7.7943e-06	0.00012966	14.3224	Over	11985	8	523	5	BraA03g30390R | BraA04g17750R | BraA06g41010R | BraA09g20550R | BraA09g51390R
GO:0009451 - RNA modification	8.38877e-06	0.000137927	3.15508	Over	11985	138	523	19	BraA01g09180R | BraA01g34940R | BraA02g14140R | BraA02g38000R | BraA03g08690R | BraA04g30960R | BraA05g01470R | BraA05g12840R | BraA05g23180R | BraA05g28020R | BraA06g38120R | BraA06g40660R | BraA07g24210R | BraA08g01110R | BraA08g19910R | BraA09g13130R | BraA09g43300R | BraA10g13110R | BraA10g23640R
GO:0006399 - tRNA metabolic process	9.39346e-06	0.000152671	3.96077	Over	11985	81	523	14	BraA01g09180R | BraA01g32210R | BraA02g38000R | BraA02g42260R | BraA03g07570R | BraA03g12860R | BraA03g45100R | BraA04g09090R | BraA04g30960R | BraA08g19910R | BraA09g06030R | BraA09g36130R | BraA10g13890R | BraA10g13900R
GO:0009790 - embryo development	1.15407e-05	0.000185438	2.10339	Over	11985	414	523	38	BraA01g07520R | BraA01g20430R | BraA01g35830R | BraA02g10100R | BraA02g30810R | BraA02g44550R | BraA03g03200R | BraA03g12860R | BraA03g17900R | BraA03g20790R | BraA03g28060R | BraA03g32590R | BraA03g50490R | BraA03g56070R | BraA04g05180R | BraA05g06640R | BraA05g28020R | BraA05g33760R | BraA05g37230R | BraA06g25160R | BraA06g39450R | BraA07g03350R | BraA08g24260R | BraA08g24270R | BraA08g28500R |…
GO:0009617 - response to bacterium	1.24705e-05	0.000198126	0.168499	Under	11985	408	523	3	BraA09g14680R | BraA09g30220R | BraA09g54380R
GO:0043207 - response to external biotic stimulus	1.29861e-05	0.000204026	0.365679	Under	11985	752	523	12	BraA01g02360R | BraA03g27140R | BraA03g27540R | BraA03g38010R | BraA06g37980R | BraA08g12740R | BraA09g14680R | BraA09g30220R | BraA09g33670R | BraA09g36370R | BraA09g54380R | BraA09g60940R
GO:0051707 - response to other organism	1.33967e-05	0.000208164	0.366166	Under	11985	751	523	12	BraA01g02360R | BraA03g27140R | BraA03g27540R | BraA03g38010R | BraA06g37980R | BraA08g12740R | BraA09g14680R | BraA09g30220R | BraA09g33670R | BraA09g36370R | BraA09g54380R | BraA09g60940R
GO:0000463 - maturation of LSU-rRNA from tricistronic rRNA transcript (SSU-rRNA, 5.8S rRNA, LSU-rRNA)	1.73114e-05	0.000266068	18.3327	Over	11985	5	523	4	BraA02g07070R | BraA03g07000R | BraA05g05640R | BraA10g22510R
GO:2001141 - regulation of RNA biosynthetic process	1.90965e-05	0.000290349	0.550484	Under	11985	1457	523	35	BraA01g07520R | BraA01g09180R | BraA01g20430R | BraA01g34480R | BraA02g05530R | BraA02g09490R | BraA02g38130R | BraA03g03200R | BraA03g10570R | BraA03g31320R | BraA03g32590R | BraA03g37260R | BraA03g45100R | BraA03g50490R | BraA04g17490R | BraA04g19410R | BraA05g12840R | BraA05g32940R | BraA05g33760R | BraA05g37230R | BraA05g38150R | BraA06g25160R | BraA06g28240R | BraA06g29370R | BraA06g41590R |…
GO:0006355 - regulation of transcription, DNA-templated	1.95579e-05	0.000291104	0.550862	Under	11985	1456	523	35	BraA01g07520R | BraA01g09180R | BraA01g20430R | BraA01g34480R | BraA02g05530R | BraA02g09490R | BraA02g38130R | BraA03g03200R | BraA03g10570R | BraA03g31320R | BraA03g32590R | BraA03g37260R | BraA03g45100R | BraA03g50490R | BraA04g17490R | BraA04g19410R | BraA05g12840R | BraA05g32940R | BraA05g33760R | BraA05g37230R | BraA05g38150R | BraA06g25160R | BraA06g28240R | BraA06g29370R | BraA06g41590R |…
GO:1903506 - regulation of nucleic acid-templated transcription	1.95579e-05	0.000291104	0.550862	Under	11985	1456	523	35	BraA01g07520R | BraA01g09180R | BraA01g20430R | BraA01g34480R | BraA02g05530R | BraA02g09490R | BraA02g38130R | BraA03g03200R | BraA03g10570R | BraA03g31320R | BraA03g32590R | BraA03g37260R | BraA03g45100R | BraA03g50490R | BraA04g17490R | BraA04g19410R | BraA05g12840R | BraA05g32940R | BraA05g33760R | BraA05g37230R | BraA05g38150R | BraA06g25160R | BraA06g28240R | BraA06g29370R | BraA06g41590R |…
GO:0019219 - regulation of nucleobase-containing compound metabolic process	2.31111e-05	0.000340407	0.562633	Under	11985	1507	523	37	BraA01g07520R | BraA01g09180R | BraA01g20430R | BraA01g34480R | BraA02g05530R | BraA02g09490R | BraA02g38130R | BraA03g03200R | BraA03g07000R | BraA03g10570R | BraA03g31320R | BraA03g32590R | BraA03g37260R | BraA03g45100R | BraA03g50490R | BraA04g17490R | BraA04g19410R | BraA05g12840R | BraA05g32940R | BraA05g33760R | BraA05g37230R | BraA05g38150R | BraA06g25160R | BraA06g28240R | BraA06g29370R |…
GO:0042742 - defense response to bacterium	3.09534e-05	0.000451218	0.135197	Under	11985	339	523	2	BraA09g14680R | BraA09g54380R
GO:0051171 - regulation of nitrogen compound metabolic process	3.2289e-05	0.000463714	0.576593	Under	11985	1550	523	39	BraA01g07520R | BraA01g09180R | BraA01g20430R | BraA01g34480R | BraA02g05530R | BraA02g09490R | BraA02g19760R | BraA02g38130R | BraA03g03200R | BraA03g07000R | BraA03g10570R | BraA03g31320R | BraA03g32590R | BraA03g37260R | BraA03g45100R | BraA03g50490R | BraA04g17490R | BraA04g19410R | BraA05g12840R | BraA05g23180R | BraA05g32940R | BraA05g33760R | BraA05g37230R | BraA05g38150R | BraA06g25160R |…
GO:0017038 - protein import	3.24666e-05	0.000463714	3.56469	Over	11985	90	523	14	BraA01g07520R | BraA01g10390R | BraA01g25630R | BraA03g45830R | BraA03g50490R | BraA03g52370R | BraA06g24070R | BraA06g41260R | BraA08g11810R | BraA08g33210R | BraA09g35160R | BraA09g62970R | BraA10g12440R | BraA10g19330R
GO:0006446 - regulation of translational initiation	3.69489e-05	0.000522457	8.59345	Over	11985	16	523	6	BraA03g30390R | BraA04g17750R | BraA04g30960R | BraA06g41010R | BraA09g20550R | BraA09g51390R
GO:0098542 - defense response to other organism	4.11825e-05	0.000576555	0.298717	Under	11985	537	523	7	BraA03g27140R | BraA03g27540R | BraA06g37980R | BraA09g14680R | BraA09g33670R | BraA09g36370R | BraA09g54380R
GO:0051252 - regulation of RNA metabolic process	4.61927e-05	0.000640358	0.57406	Under	11985	1477	523	37	BraA01g07520R | BraA01g09180R | BraA01g20430R | BraA01g34480R | BraA02g05530R | BraA02g09490R | BraA02g38130R | BraA03g03200R | BraA03g07000R | BraA03g10570R | BraA03g31320R | BraA03g32590R | BraA03g37260R | BraA03g45100R | BraA03g50490R | BraA04g17490R | BraA04g19410R | BraA05g12840R | BraA05g32940R | BraA05g33760R | BraA05g37230R | BraA05g38150R | BraA06g25160R | BraA06g28240R | BraA06g29370R |…
GO:0044255 - cellular lipid metabolic process	4.71114e-05	0.000644884	0.300959	Under	11985	533	523	7	BraA03g07830R | BraA03g20040R | BraA03g30030R | BraA03g56070R | BraA05g14460R | BraA09g33470R | BraA10g21940R
GO:0002376 - immune system process	4.74313e-05	0.000644884	0.0821357	Under	11985	279	523	1	BraA06g04420R
GO:0006811 - ion transport	4.87193e-05	0.000656087	0.301525	Under	11985	532	523	7	BraA01g25630R | BraA02g22730R | BraA02g38490R | BraA03g58420R | BraA05g07890R | BraA06g30450R | BraA09g60940R
GO:0001510 - RNA methylation	5.23776e-05	0.000698697	6.6838	Over	11985	24	523	7	BraA01g09180R | BraA02g14140R | BraA04g30960R | BraA08g19910R | BraA09g43300R | BraA10g13110R | BraA10g23640R
GO:0034504 - protein localization to nucleus	5.83425e-05	0.000770993	4.49331	Over	11985	51	523	10	BraA01g07520R | BraA03g45830R | BraA03g50490R | BraA05g34350R | BraA08g11810R | BraA08g33210R | BraA09g35160R | BraA09g62970R | BraA10g12440R | BraA10g19330R
GO:0044712 - single-organism catabolic process	5.89805e-05	0.000772207	0.254621	Under	11985	450	523	5	BraA01g19920R | BraA03g27140R | BraA04g07420R | BraA09g33470R | BraA09g33670R
GO:0044281 - small molecule metabolic process	6.02531e-05	0.000781632	0.565003	Under	11985	1379	523	34	BraA01g32210R | BraA01g35830R | BraA02g19760R | BraA02g21650R | BraA02g38000R | BraA02g41350R | BraA02g42260R | BraA03g04990R | BraA03g07830R | BraA03g12860R | BraA03g27140R | BraA03g30030R | BraA04g07420R | BraA04g09090R | BraA04g29160R | BraA05g14460R | BraA05g33500R | BraA05g37950R | BraA06g11230R | BraA06g11280R | BraA07g04740R | BraA07g26820R | BraA08g01410R | BraA09g06030R | BraA09g31240R |…
GO:1901362 - organic cyclic compound biosynthetic process	6.10715e-05	0.000785046	0.643898	Under	11985	1993	523	56	BraA01g07520R | BraA01g09180R | BraA01g20430R | BraA01g34480R | BraA01g35830R | BraA02g05530R | BraA02g09490R | BraA02g21650R | BraA02g28050R | BraA02g38130R | BraA03g03200R | BraA03g10570R | BraA03g18030R | BraA03g31320R | BraA03g32590R | BraA03g37260R | BraA03g45100R | BraA03g50490R | BraA04g04040R | BraA04g17490R | BraA04g19410R | BraA04g24050R | BraA05g12840R | BraA05g14800R | BraA05g23180R |…
GO:0005975 - carbohydrate metabolic process	7.03436e-05	0.000896089	0.442819	Under	11985	828	523	16	BraA01g35830R | BraA03g27140R | BraA03g30030R | BraA03g41570R | BraA04g07420R | BraA04g11900R | BraA05g26230R | BraA07g27180R | BraA07g35710R | BraA08g22840R | BraA08g32000R | BraA09g01500R | BraA09g33470R | BraA09g33670R | BraA09g47720R | BraA10g23960R
GO:0006996 - organelle organization	7.84186e-05	0.000973807	1.64069	Over	11985	852	523	61	BraA01g09180R | BraA01g09700R | BraA01g10390R | BraA01g11090R | BraA01g13680R | BraA01g20430R | BraA01g25630R | BraA01g29080R | BraA02g02100R | BraA02g04220R | BraA02g44550R | BraA03g15730R | BraA03g17940R | BraA03g20570R | BraA03g28060R | BraA03g41030R | BraA03g45100R | BraA03g45570R | BraA03g47600R | BraA03g52370R | BraA03g56070R | BraA04g05180R | BraA04g05530R | BraA04g08100R | BraA04g17370R |…
GO:0016070 - RNA metabolic process	8.00642e-05	0.000973807	1.38186	Over	11985	1990	523	120	BraA01g07520R | BraA01g09180R | BraA01g11040R | BraA01g20430R | BraA01g29080R | BraA01g30550R | BraA01g32210R | BraA01g34480R | BraA01g34940R | BraA01g35670R | BraA02g02100R | BraA02g05530R | BraA02g07070R | BraA02g09490R | BraA02g14140R | BraA02g28050R | BraA02g28210R | BraA02g38000R | BraA02g38130R | BraA02g38590R | BraA02g42260R | BraA02g44390R | BraA03g03200R | BraA03g03230R | BraA03g07000R |…
GO:0001732 - formation of cytoplasmic translation initiation complex	8.26427e-05	0.000973807	22.9159	Over	11985	3	523	3	BraA02g29740R | BraA03g27210R | BraA09g26690R
GO:0002188 - translation reinitiation	8.26427e-05	0.000973807	22.9159	Over	11985	3	523	3	BraA02g29740R | BraA03g27210R | BraA09g26690R
GO:0000447 - endonucleolytic cleavage in ITS1 to separate SSU-rRNA from 5.8S rRNA and LSU-rRNA from tricistronic rRNA transcript (SSU-rRNA, 5.8S rRNA, LSU-rRNA)	8.26427e-05	0.000973807	22.9159	Over	11985	3	523	3	BraA04g17370R | BraA07g27580R | BraA07g35110R
GO:0000479 - endonucleolytic cleavage of tricistronic rRNA transcript (SSU-rRNA, 5.8S rRNA, LSU-rRNA)	8.26427e-05	0.000973807	22.9159	Over	11985	3	523	3	BraA04g17370R | BraA07g27580R | BraA07g35110R
GO:0000461 - endonucleolytic cleavage to generate mature 3'-end of SSU-rRNA from (SSU-rRNA, 5.8S rRNA, LSU-rRNA)	8.26427e-05	0.000973807	22.9159	Over	11985	3	523	3	BraA04g17370R | BraA07g27580R | BraA07g35110R
GO:0006407 - rRNA export from nucleus	8.26427e-05	0.000973807	22.9159	Over	11985	3	523	3	BraA04g17370R | BraA07g27580R | BraA07g35110R
GO:0051029 - rRNA transport	8.26427e-05	0.000973807	22.9159	Over	11985	3	523	3	BraA04g17370R | BraA07g27580R | BraA07g35110R
GO:0035556 - intracellular signal transduction	0.000104997	0.00122699	0.232648	Under	11985	394	523	4	BraA01g07520R | BraA03g50490R | BraA07g29060R | BraA07g37680R
GO:0031167 - rRNA methylation	0.000112944	0.00126748	13.0948	Over	11985	7	523	4	BraA01g09180R | BraA02g14140R | BraA08g19910R | BraA10g13110R
GO:0000054 - ribosomal subunit export from nucleus	0.000112944	0.00126748	13.0948	Over	11985	7	523	4	BraA04g05180R | BraA07g30210R | BraA09g59720R | BraA10g12440R
GO:0033750 - ribosome localization	0.000112944	0.00126748	13.0948	Over	11985	7	523	4	BraA04g05180R | BraA07g30210R | BraA09g59720R | BraA10g12440R
GO:0033753 - establishment of ribosome localization	0.000112944	0.00126748	13.0948	Over	11985	7	523	4	BraA04g05180R | BraA07g30210R | BraA09g59720R | BraA10g12440R
GO:0071428 - rRNA-containing ribonucleoprotein complex export from nucleus	0.000112944	0.00126748	13.0948	Over	11985	7	523	4	BraA04g05180R | BraA07g30210R | BraA09g59720R | BraA10g12440R
GO:0009415 - response to water	0.000115511	0.00128608	0.149777	Under	11985	306	523	2	BraA08g06560R | BraA10g30710R
GO:0006979 - response to oxidative stress	0.000124507	0.00137542	0.197551	Under	11985	348	523	3	BraA03g20570R | BraA04g05530R | BraA08g01410R
GO:0009414 - response to water deprivation	0.000135288	0.00148292	0.151761	Under	11985	302	523	2	BraA08g06560R | BraA10g30710R
GO:0006606 - protein import into nucleus	0.000139089	0.00148994	4.48354	Over	11985	46	523	9	BraA01g07520R | BraA03g45830R | BraA03g50490R | BraA08g11810R | BraA08g33210R | BraA09g35160R | BraA09g62970R | BraA10g12440R | BraA10g19330R
GO:0044744 - protein targeting to nucleus	0.000139089	0.00148994	4.48354	Over	11985	46	523	9	BraA01g07520R | BraA03g45830R | BraA03g50490R | BraA08g11810R | BraA08g33210R | BraA09g35160R | BraA09g62970R | BraA10g12440R | BraA10g19330R
GO:1902593 - single-organism nuclear import	0.000139089	0.00148994	4.48354	Over	11985	46	523	9	BraA01g07520R | BraA03g45830R | BraA03g50490R | BraA08g11810R | BraA08g33210R | BraA09g35160R | BraA09g62970R | BraA10g12440R | BraA10g19330R
GO:1902580 - single-organism cellular localization	0.000150843	0.00160369	2.43047	Over	11985	198	523	21	BraA01g07520R | BraA01g10390R | BraA01g25630R | BraA03g45830R | BraA03g50490R | BraA03g52370R | BraA04g05180R | BraA04g08100R | BraA06g24070R | BraA06g41260R | BraA07g12810R | BraA07g30210R | BraA07g31220R | BraA08g11810R | BraA08g33210R | BraA09g15700R | BraA09g35160R | BraA09g59720R | BraA09g62970R | BraA10g12440R | BraA10g19330R
GO:0006418 - tRNA aminoacylation for protein translation	0.000156889	0.00163118	4.95478	Over	11985	37	523	8	BraA01g32210R | BraA02g42260R | BraA03g12860R | BraA04g09090R | BraA09g06030R | BraA09g36130R | BraA10g13890R | BraA10g13900R
GO:0043038 - amino acid activation	0.000156889	0.00163118	4.95478	Over	11985	37	523	8	BraA01g32210R | BraA02g42260R | BraA03g12860R | BraA04g09090R | BraA09g06030R | BraA09g36130R | BraA10g13890R | BraA10g13900R
GO:0043039 - tRNA aminoacylation	0.000156889	0.00163118	4.95478	Over	11985	37	523	8	BraA01g32210R | BraA02g42260R | BraA03g12860R | BraA04g09090R | BraA09g06030R | BraA09g36130R | BraA10g13890R | BraA10g13900R
GO:0016192 - vesicle-mediated transport	0.000158392	0.0016348	0.153798	Under	11985	298	523	2	BraA03g15730R | BraA07g12810R
GO:1902578 - single-organism localization	0.000160517	0.00164472	0.578595	Under	11985	1307	523	33	BraA01g07520R | BraA01g10390R | BraA01g25630R | BraA02g06240R | BraA02g22730R | BraA02g38490R | BraA03g27540R | BraA03g45830R | BraA03g50490R | BraA03g52370R | BraA03g58420R | BraA04g05180R | BraA04g08100R | BraA04g17370R | BraA05g07890R | BraA06g24070R | BraA06g30450R | BraA06g41260R | BraA07g12810R | BraA07g27580R | BraA07g30210R | BraA07g31220R | BraA07g35110R | BraA08g05460R | BraA08g11810R |…
GO:0051168 - nuclear export	0.00016548	0.00168337	4.38815	Over	11985	47	523	9	BraA04g05180R | BraA04g17370R | BraA07g27580R | BraA07g30210R | BraA07g35110R | BraA08g33210R | BraA09g59720R | BraA09g62970R | BraA10g12440R
GO:0006955 - immune response	0.000174643	0.00176389	0.0924027	Under	11985	248	523	1	BraA06g04420R
GO:0044765 - single-organism transport	0.000184714	0.00185238	0.5765	Under	11985	1272	523	32	BraA01g07520R | BraA01g10390R | BraA01g25630R | BraA02g06240R | BraA02g22730R | BraA02g38490R | BraA03g27540R | BraA03g45830R | BraA03g50490R | BraA03g52370R | BraA03g58420R | BraA04g05180R | BraA04g17370R | BraA05g07890R | BraA06g24070R | BraA06g30450R | BraA06g41260R | BraA07g12810R | BraA07g27580R | BraA07g30210R | BraA07g31220R | BraA07g35110R | BraA08g05460R | BraA08g11810R | BraA08g33210R |…
GO:0048316 - seed development	0.000186602	0.00185813	1.79991	Over	11985	522	523	41	BraA01g07520R | BraA01g20430R | BraA01g35830R | BraA02g10100R | BraA02g30810R | BraA02g44550R | BraA03g03200R | BraA03g10570R | BraA03g12860R | BraA03g17900R | BraA03g20790R | BraA03g28060R | BraA03g32590R | BraA03g50490R | BraA03g56070R | BraA03g57680R | BraA04g05180R | BraA04g19410R | BraA05g06640R | BraA05g28020R | BraA05g33760R | BraA05g37230R | BraA06g25160R | BraA06g39450R | BraA07g03350R |…
GO:0000082 - G1/S transition of mitotic cell cycle	0.000218093	0.00212678	11.4579	Over	11985	8	523	4	BraA03g57680R | BraA05g32940R | BraA08g33210R | BraA09g62970R
GO:0071166 - ribonucleoprotein complex localization	0.000218093	0.00212678	11.4579	Over	11985	8	523	4	BraA04g05180R | BraA07g30210R | BraA09g59720R | BraA10g12440R
GO:0071426 - ribonucleoprotein complex export from nucleus	0.000218093	0.00212678	11.4579	Over	11985	8	523	4	BraA04g05180R | BraA07g30210R | BraA09g59720R | BraA10g12440R
GO:0090304 - nucleic acid metabolic process	0.00022428	0.00217214	1.33614	Over	11985	2161	523	126	BraA01g07520R | BraA01g09180R | BraA01g09700R | BraA01g11040R | BraA01g15470R | BraA01g20430R | BraA01g29080R | BraA01g30550R | BraA01g32210R | BraA01g34480R | BraA01g34940R | BraA01g35670R | BraA02g02100R | BraA02g05530R | BraA02g07070R | BraA02g09490R | BraA02g14140R | BraA02g28050R | BraA02g28210R | BraA02g38000R | BraA02g38130R | BraA02g38590R | BraA02g42260R | BraA02g44390R | BraA03g03200R |…
GO:0072594 - establishment of protein localization to organelle	0.000226592	0.0021796	2.65013	Over	11985	147	523	17	BraA01g07520R | BraA01g10390R | BraA01g25630R | BraA03g45830R | BraA03g50490R | BraA03g52370R | BraA06g24070R | BraA06g41260R | BraA07g12810R | BraA07g31220R | BraA08g11810R | BraA08g33210R | BraA09g15700R | BraA09g35160R | BraA09g62970R | BraA10g12440R | BraA10g19330R
GO:0051170 - nuclear import	0.000230864	0.002194	4.20904	Over	11985	49	523	9	BraA01g07520R | BraA03g45830R | BraA03g50490R | BraA08g11810R | BraA08g33210R | BraA09g35160R | BraA09g62970R | BraA10g12440R | BraA10g19330R
GO:0019438 - aromatic compound biosynthetic process	0.000231192	0.002194	0.664053	Under	11985	1898	523	55	BraA01g07520R | BraA01g09180R | BraA01g20430R | BraA01g34480R | BraA01g35830R | BraA02g05530R | BraA02g09490R | BraA02g21650R | BraA02g28050R | BraA02g38130R | BraA03g03200R | BraA03g10570R | BraA03g18030R | BraA03g31320R | BraA03g32590R | BraA03g37260R | BraA03g45100R | BraA03g50490R | BraA04g04040R | BraA04g17490R | BraA04g19410R | BraA04g24050R | BraA05g12840R | BraA05g14800R | BraA05g23180R |…
GO:0018130 - heterocycle biosynthetic process	0.000240642	0.00226845	0.662096	Under	11985	1869	523	54	BraA01g07520R | BraA01g09180R | BraA01g20430R | BraA01g34480R | BraA01g35830R | BraA02g05530R | BraA02g09490R | BraA02g21650R | BraA02g28050R | BraA02g38130R | BraA03g03200R | BraA03g10570R | BraA03g18030R | BraA03g31320R | BraA03g32590R | BraA03g37260R | BraA03g45100R | BraA03g50490R | BraA04g04040R | BraA04g17490R | BraA04g19410R | BraA04g24050R | BraA05g12840R | BraA05g14800R | BraA05g23180R |…
GO:0044271 - cellular nitrogen compound biosynthetic process	0.000264629	0.00247805	0.663872	Under	11985	1864	523	54	BraA01g07520R | BraA01g09180R | BraA01g20430R | BraA01g34480R | BraA01g35830R | BraA02g05530R | BraA02g09490R | BraA02g28050R | BraA02g38130R | BraA03g03200R | BraA03g04990R | BraA03g10570R | BraA03g18030R | BraA03g31320R | BraA03g32590R | BraA03g37260R | BraA03g45100R | BraA03g50490R | BraA04g04040R | BraA04g17490R | BraA04g19410R | BraA04g24050R | BraA05g12840R | BraA05g14800R | BraA05g23180R |…
GO:0045087 - innate immune response	0.000276253	0.00256988	0.0966914	Under	11985	237	523	1	BraA06g04420R
GO:0009735 - response to cytokinin	0.000280113	0.00258876	2.2239	Over	11985	237	523	23	BraA01g01860R | BraA01g07520R | BraA01g16110R | BraA02g19760R | BraA03g19140R | BraA03g41030R | BraA03g50490R | BraA03g57680R | BraA04g24820R | BraA05g08690R | BraA05g17700R | BraA05g35510R | BraA06g13900R | BraA06g17790R | BraA06g23380R | BraA07g10800R | BraA08g12560R | BraA08g21330R | BraA09g14500R | BraA09g54190R | BraA09g54810R | BraA09g56800R | BraA10g31200R
GO:0006812 - cation transport	0.000285136	0.00261806	0.16195	Under	11985	283	523	2	BraA02g22730R | BraA05g07890R
GO:0006605 - protein targeting	0.000288685	0.00263355	2.51516	Over	11985	164	523	18	BraA01g07520R | BraA01g10390R | BraA01g25630R | BraA03g45830R | BraA03g50490R | BraA03g52370R | BraA06g24070R | BraA06g41260R | BraA07g12810R | BraA07g31220R | BraA08g05460R | BraA08g11810R | BraA08g33210R | BraA09g15700R | BraA09g35160R | BraA09g62970R | BraA10g12440R | BraA10g19330R
GO:0055085 - transmembrane transport	0.000294275	0.00266734	0.377044	Under	11985	547	523	9	BraA01g10390R | BraA01g25630R | BraA02g38490R | BraA03g52370R | BraA03g58420R | BraA05g07890R | BraA06g24070R | BraA06g41260R | BraA09g60940R
GO:0016074 - snoRNA metabolic process	0.000319811	0.00282633	17.1869	Over	11985	4	523	3	BraA01g09180R | BraA01g11040R | BraA08g19910R
GO:0031126 - snoRNA 3'-end processing	0.000319811	0.00282633	17.1869	Over	11985	4	523	3	BraA01g09180R | BraA01g11040R | BraA08g19910R
GO:0043144 - snoRNA processing	0.000319811	0.00282633	17.1869	Over	11985	4	523	3	BraA01g09180R | BraA01g11040R | BraA08g19910R
GO:0006424 - glutamyl-tRNA aminoacylation	0.000319811	0.00282633	17.1869	Over	11985	4	523	3	BraA02g42260R | BraA09g06030R | BraA09g36130R
GO:0009056 - catabolic process	0.000345934	0.00303821	0.536726	Under	11985	982	523	23	BraA01g11040R | BraA01g19920R | BraA02g09490R | BraA03g12160R | BraA03g27140R | BraA03g37180R | BraA03g53450R | BraA04g01550R | BraA04g07420R | BraA04g11960R | BraA05g34590R | BraA05g38150R | BraA07g23560R | BraA07g30210R | BraA07g37400R | BraA08g26460R | BraA08g33210R | BraA09g14500R | BraA09g17670R | BraA09g33470R | BraA09g33670R | BraA09g49770R | BraA09g62970R
GO:0044723 - single-organism carbohydrate metabolic process	0.000397855	0.00347263	0.384065	Under	11985	537	523	9	BraA01g35830R | BraA03g30030R | BraA04g07420R | BraA04g11900R | BraA07g27180R | BraA07g35710R | BraA08g22840R | BraA08g32000R | BraA09g33470R
GO:0042592 - homeostatic process	0.000438979	0.00380807	0.292294	Under	11985	392	523	5	BraA05g07890R | BraA05g25100R | BraA07g19080R | BraA09g13130R | BraA10g15560R
GO:0010154 - fruit development	0.000457033	0.00387852	1.72395	Over	11985	545	523	41	BraA01g07520R | BraA01g20430R | BraA01g35830R | BraA02g10100R | BraA02g30810R | BraA02g44550R | BraA03g03200R | BraA03g10570R | BraA03g12860R | BraA03g17900R | BraA03g20790R | BraA03g28060R | BraA03g32590R | BraA03g50490R | BraA03g56070R | BraA03g57680R | BraA04g05180R | BraA04g19410R | BraA05g06640R | BraA05g28020R | BraA05g33760R | BraA05g37230R | BraA06g25160R | BraA06g39450R | BraA07g03350R |…
GO:0031123 - RNA 3'-end processing	0.000459521	0.00387852	4.86094	Over	11985	33	523	7	BraA01g09180R | BraA01g11040R | BraA04g17370R | BraA07g27580R | BraA07g35110R | BraA08g19910R | BraA09g17670R
GO:0006626 - protein targeting to mitochondrion	0.000460814	0.00387852	5.72897	Over	11985	24	523	6	BraA01g10390R | BraA01g25630R | BraA03g52370R | BraA06g24070R | BraA06g41260R | BraA09g15700R
GO:0070585 - protein localization to mitochondrion	0.000460814	0.00387852	5.72897	Over	11985	24	523	6	BraA01g10390R | BraA01g25630R | BraA03g52370R | BraA06g24070R | BraA06g41260R | BraA09g15700R
GO:0072655 - establishment of protein localization to mitochondrion	0.000460814	0.00387852	5.72897	Over	11985	24	523	6	BraA01g10390R | BraA01g25630R | BraA03g52370R | BraA06g24070R | BraA06g41260R | BraA09g15700R
GO:0050657 - nucleic acid transport	0.000492362	0.00407134	3.81931	Over	11985	54	523	9	BraA03g01670R | BraA03g15730R | BraA04g17370R | BraA04g31040R | BraA05g17520R | BraA07g27580R | BraA07g35110R | BraA08g33210R | BraA09g62970R
GO:0050658 - RNA transport	0.000492362	0.00407134	3.81931	Over	11985	54	523	9	BraA03g01670R | BraA03g15730R | BraA04g17370R | BraA04g31040R | BraA05g17520R | BraA07g27580R | BraA07g35110R | BraA08g33210R | BraA09g62970R
GO:0051236 - establishment of RNA localization	0.000492362	0.00407134	3.81931	Over	11985	54	523	9	BraA03g01670R | BraA03g15730R | BraA04g17370R | BraA04g31040R | BraA05g17520R | BraA07g27580R | BraA07g35110R | BraA08g33210R | BraA09g62970R
GO:0009553 - embryo sac development	0.000515857	0.00424083	3.05545	Over	11985	90	523	12	BraA03g03230R | BraA03g28060R | BraA04g02500R | BraA05g32940R | BraA05g38150R | BraA06g11300R | BraA07g09880R | BraA08g28500R | BraA09g13130R | BraA09g24680R | BraA09g45850R | BraA09g58040R
GO:0048519 - negative regulation of biological process	0.000581404	0.00471766	0.454819	Under	11985	655	523	13	BraA01g20430R | BraA03g03200R | BraA03g10570R | BraA03g32590R | BraA04g16420R | BraA04g19410R | BraA05g32940R | BraA05g33760R | BraA05g37230R | BraA06g04420R | BraA06g25160R | BraA09g54380R | BraA10g30710R
GO:0010608 - posttranscriptional regulation of gene expression	0.00058239	0.00471766	2.52865	Over	11985	145	523	16	BraA01g02360R | BraA03g30390R | BraA03g55310R | BraA04g17750R | BraA04g19410R | BraA04g30960R | BraA05g28980R | BraA06g04180R | BraA06g13550R | BraA06g25160R | BraA06g41010R | BraA08g12740R | BraA08g28260R | BraA09g20550R | BraA09g51390R | BraA09g54990R
GO:0070647 - protein modification by small protein conjugation or removal	0.000583869	0.00471766	0.32737	Under	11985	420	523	6	BraA03g11940R | BraA03g12160R | BraA03g37180R | BraA04g01550R | BraA07g23560R | BraA09g49770R
GO:0032259 - methylation	0.000603052	0.00484498	2.30371	Over	11985	189	523	19	BraA01g09180R | BraA01g13610R | BraA02g14140R | BraA02g38000R | BraA03g51780R | BraA04g30960R | BraA06g20860R | BraA06g25960R | BraA06g25980R | BraA06g27610R | BraA06g32320R | BraA07g02050R | BraA08g19910R | BraA09g01500R | BraA09g20460R | BraA09g27960R | BraA09g43300R | BraA10g13110R | BraA10g23640R
GO:0033554 - cellular response to stress	0.000621712	0.00496667	0.395101	Under	11985	522	523	9	BraA01g09700R | BraA01g15470R | BraA01g20430R | BraA04g11960R | BraA07g28060R | BraA08g01410R | BraA08g12490R | BraA08g27830R | BraA10g14190R
GO:0006403 - RNA localization	0.000649214	0.00515724	3.68291	Over	11985	56	523	9	BraA03g01670R | BraA03g15730R | BraA04g17370R | BraA04g31040R | BraA05g17520R | BraA07g27580R | BraA07g35110R | BraA08g33210R | BraA09g62970R
GO:0051704 - multi-organism process	0.000702488	0.00554926	0.560633	Under	11985	981	523	24	BraA01g02360R | BraA02g04530R | BraA03g10570R | BraA03g17900R | BraA03g20790R | BraA03g27140R | BraA03g27540R | BraA03g28060R | BraA03g30030R | BraA03g38010R | BraA05g05640R | BraA05g06640R | BraA05g32940R | BraA06g04180R | BraA06g37980R | BraA08g12740R | BraA09g14680R | BraA09g24680R | BraA09g30220R | BraA09g33670R | BraA09g36370R | BraA09g54380R | BraA09g60940R | BraA10g14190R
GO:0006396 - RNA processing	0.000712615	0.00559799	2.01016	Over	11985	285	523	25	BraA01g09180R | BraA01g11040R | BraA01g20430R | BraA01g35670R | BraA02g38590R | BraA03g38560R | BraA03g45100R | BraA04g17370R | BraA04g19410R | BraA04g31040R | BraA05g01320R | BraA05g26870R | BraA05g36720R | BraA06g15210R | BraA06g17360R | BraA06g26150R | BraA07g27580R | BraA07g28060R | BraA07g35110R | BraA07g37400R | BraA08g19100R | BraA08g19910R | BraA09g17670R | BraA09g19530R | BraA09g43300R
GO:0032446 - protein modification by small protein conjugation	0.000725482	0.00566758	0.303924	Under	11985	377	523	5	BraA03g11940R | BraA03g37180R | BraA04g01550R | BraA07g23560R | BraA09g49770R
GO:0006421 - asparaginyl-tRNA aminoacylation	0.000773561	0.00600997	13.7495	Over	11985	5	523	3	BraA03g12860R | BraA10g13890R | BraA10g13900R
GO:0033365 - protein localization to organelle	0.000829456	0.00638748	2.30439	Over	11985	179	523	18	BraA01g07520R | BraA01g10390R | BraA01g25630R | BraA03g45830R | BraA03g50490R | BraA03g52370R | BraA05g34350R | BraA06g24070R | BraA06g41260R | BraA07g12810R | BraA07g31220R | BraA08g11810R | BraA08g33210R | BraA09g15700R | BraA09g35160R | BraA09g62970R | BraA10g12440R | BraA10g19330R
GO:0032787 - monocarboxylic acid metabolic process	0.000831186	0.00638748	0.336174	Under	11985	409	523	6	BraA03g07830R | BraA04g07420R | BraA05g14460R | BraA09g33470R | BraA10g21940R | BraA10g23960R
GO:1901615 - organic hydroxy compound metabolic process	0.00123116	0.00941007	0.187068	Under	11985	245	523	2	BraA03g30030R | BraA10g23960R
GO:0044283 - small molecule biosynthetic process	0.00124891	0.00949437	0.447735	Under	11985	563	523	11	BraA02g21650R | BraA02g41350R | BraA03g04990R | BraA03g07830R | BraA05g14460R | BraA05g33500R | BraA09g33470R | BraA09g39010R | BraA09g46320R | BraA10g21940R | BraA10g23960R
GO:0016567 - protein ubiquitination	0.00131221	0.00992229	0.319163	Under	11985	359	523	5	BraA03g11940R | BraA03g37180R | BraA04g01550R | BraA07g23560R | BraA09g49770R

## Sheet: HC_04
	P-Value	Adj_P-Value	Fold Enrichment	Enrichment Direction	TotalInRef	AnnInRef	TotalInTest	AnnInTest	GenesWithAnn
GO:0016070 - RNA metabolic process	2.36047e-06	0.00509625	1.35925	Over	11985	1990	833	188	BraA01g03670R | BraA01g04990R | BraA01g08040R | BraA01g09900R | BraA01g11980R | BraA01g24710R | BraA01g29090R | BraA01g29640R | BraA01g30290R | BraA01g34540R | BraA01g36340R | BraA02g01670R | BraA02g02500R | BraA02g02920R | BraA02g03830R | BraA02g05100R | BraA02g05970R | BraA02g13080R | BraA02g14780R | BraA02g16490R | BraA02g19430R | BraA02g20980R | BraA02g25210R | BraA02g25610R | BraA02g34910R |…

## Sheet: HC_05
	P-Value	Adj_P-Value	Fold Enrichment	Enrichment Direction	TotalInRef	AnnInRef	TotalInTest	AnnInTest	GenesWithAnn
GO:0006412 - translation	3.29651e-10	9.77745e-07	0.370855	Under	11985	413	1878	24	BraA01g03410R | BraA01g24030R | BraA01g27710R | BraA02g06920R | BraA03g08650R | BraA03g11270R | BraA03g14420R | BraA03g33820R | BraA05g23460R | BraA05g27280R | BraA05g38050R | BraA06g12850R | BraA06g26420R | BraA06g28150R | BraA06g31960R | BraA07g05640R | BraA07g18540R | BraA07g40400R | BraA08g17880R | BraA09g06760R | BraA09g21770R | BraA09g27140R | BraA09g50220R | BraA10g24990R
GO:0015979 - photosynthesis	1.70612e-09	2.53017e-06	0.263909	Under	11985	266	1878	11	BraA01g11000R | BraA02g19660R | BraA03g29140R | BraA04g31780R | BraA05g01480R | BraA06g03920R | BraA07g08780R | BraA07g20630R | BraA07g23630R | BraA07g32260R | BraA10g14320R
GO:0019684 - photosynthesis, light reaction	2.66932e-07	0.000263907	0.141818	Under	11985	135	1878	3	BraA02g19660R | BraA07g32260R | BraA10g14320R

## Sheet: HC_06
	P-Value	Adj_P-Value	Fold Enrichment	Enrichment Direction	TotalInRef	AnnInRef	TotalInTest	AnnInTest	GenesWithAnn
GO:0009451 - RNA modification	1.78622e-18	1.80409e-15	12.6533	Over	11985	138	151	22	BraA01g01940R | BraA01g10190R | BraA01g16280R | BraA01g29350R | BraA01g33690R | BraA03g13950R | BraA03g23380R | BraA03g25730R | BraA03g36290R | BraA03g42840R | BraA04g24290R | BraA05g11520R | BraA05g26470R | BraA05g30530R | BraA06g01060R | BraA06g01350R | BraA06g23510R | BraA09g52800R | BraA09g61560R | BraA10g02870R | BraA10g23760R | BraA10g25350R
GO:0006139 - nucleobase-containing compound metabolic process	1.14622e-17	5.78841e-15	2.52794	Over	11985	2449	151	78	BraA01g01940R | BraA01g10190R | BraA01g16280R | BraA01g24130R | BraA01g29350R | BraA01g30540R | BraA01g32460R | BraA01g33690R | BraA02g04490R | BraA02g05180R | BraA02g07160R | BraA02g10290R | BraA02g11560R | BraA02g18270R | BraA02g21270R | BraA02g21740R | BraA02g40730R | BraA03g13950R | BraA03g23080R | BraA03g23380R | BraA03g24720R | BraA03g25730R | BraA03g34460R | BraA03g36290R | BraA03g41340R |…
GO:0016070 - RNA metabolic process	4.11652e-17	1.3859e-14	2.75205	Over	11985	1990	151	69	BraA01g01940R | BraA01g10190R | BraA01g16280R | BraA01g24130R | BraA01g29350R | BraA01g30540R | BraA01g32460R | BraA01g33690R | BraA02g04490R | BraA02g07160R | BraA02g10290R | BraA02g11560R | BraA02g18270R | BraA02g40730R | BraA03g13950R | BraA03g23080R | BraA03g23380R | BraA03g24720R | BraA03g25730R | BraA03g34460R | BraA03g36290R | BraA03g41340R | BraA03g42840R | BraA03g55660R | BraA04g21650R |…
GO:0090304 - nucleic acid metabolic process	2.01797e-16	5.09537e-14	2.60774	Over	11985	2161	151	71	BraA01g01940R | BraA01g10190R | BraA01g16280R | BraA01g24130R | BraA01g29350R | BraA01g30540R | BraA01g32460R | BraA01g33690R | BraA02g04490R | BraA02g07160R | BraA02g10290R | BraA02g11560R | BraA02g18270R | BraA02g40730R | BraA03g13950R | BraA03g23080R | BraA03g23380R | BraA03g24720R | BraA03g25730R | BraA03g34460R | BraA03g36290R | BraA03g41340R | BraA03g42840R | BraA03g55660R | BraA04g21650R |…
GO:0034641 - cellular nitrogen compound metabolic process	2.19568e-15	4.43528e-13	2.29178	Over	11985	2736	151	79	BraA01g01940R | BraA01g10190R | BraA01g16280R | BraA01g24130R | BraA01g28350R | BraA01g29350R | BraA01g30540R | BraA01g32460R | BraA01g33690R | BraA02g04490R | BraA02g05180R | BraA02g07160R | BraA02g10290R | BraA02g11560R | BraA02g18270R | BraA02g21270R | BraA02g21740R | BraA02g40730R | BraA03g13950R | BraA03g23080R | BraA03g23380R | BraA03g24720R | BraA03g25730R | BraA03g34460R | BraA03g36290R |…
GO:0046483 - heterocycle metabolic process	4.75767e-15	8.00874e-13	2.28447	Over	11985	2710	151	78	BraA01g01940R | BraA01g10190R | BraA01g16280R | BraA01g24130R | BraA01g29350R | BraA01g30540R | BraA01g32460R | BraA01g33690R | BraA02g04490R | BraA02g05180R | BraA02g07160R | BraA02g10290R | BraA02g11560R | BraA02g18270R | BraA02g21270R | BraA02g21740R | BraA02g40730R | BraA03g13950R | BraA03g23080R | BraA03g23380R | BraA03g24720R | BraA03g25730R | BraA03g34460R | BraA03g36290R | BraA03g41340R |…
GO:0006725 - cellular aromatic compound metabolic process	2.16636e-14	3.12575e-12	2.22535	Over	11985	2782	151	78	BraA01g01940R | BraA01g10190R | BraA01g16280R | BraA01g24130R | BraA01g29350R | BraA01g30540R | BraA01g32460R | BraA01g33690R | BraA02g04490R | BraA02g05180R | BraA02g07160R | BraA02g10290R | BraA02g11560R | BraA02g18270R | BraA02g21270R | BraA02g21740R | BraA02g40730R | BraA03g13950R | BraA03g23080R | BraA03g23380R | BraA03g24720R | BraA03g25730R | BraA03g34460R | BraA03g36290R | BraA03g41340R |…
GO:1901360 - organic cyclic compound metabolic process	4.87467e-14	6.15426e-12	2.17341	Over	11985	2885	151	79	BraA01g01940R | BraA01g10190R | BraA01g16280R | BraA01g24130R | BraA01g29350R | BraA01g30540R | BraA01g32460R | BraA01g33690R | BraA02g04490R | BraA02g05180R | BraA02g07160R | BraA02g10290R | BraA02g11560R | BraA02g18270R | BraA02g21270R | BraA02g21740R | BraA02g40730R | BraA03g13950R | BraA03g23080R | BraA03g23380R | BraA03g24720R | BraA03g25730R | BraA03g25780R | BraA03g34460R | BraA03g36290R |…
GO:0006807 - nitrogen compound metabolic process	1.53874e-12	1.72681e-10	2.04511	Over	11985	3066	151	79	BraA01g01940R | BraA01g10190R | BraA01g16280R | BraA01g24130R | BraA01g28350R | BraA01g29350R | BraA01g30540R | BraA01g32460R | BraA01g33690R | BraA02g04490R | BraA02g05180R | BraA02g07160R | BraA02g10290R | BraA02g11560R | BraA02g18270R | BraA02g21270R | BraA02g21740R | BraA02g40730R | BraA03g13950R | BraA03g23080R | BraA03g23380R | BraA03g24720R | BraA03g25730R | BraA03g34460R | BraA03g36290R |…
GO:0016071 - mRNA metabolic process	2.72246e-10	2.74968e-08	6.52363	Over	11985	219	151	18	BraA01g29350R | BraA01g32460R | BraA01g33690R | BraA02g10290R | BraA03g13950R | BraA03g36290R | BraA04g21650R | BraA04g24290R | BraA05g07470R | BraA05g11520R | BraA05g30530R | BraA05g35160R | BraA06g01060R | BraA06g01350R | BraA06g29330R | BraA06g37630R | BraA08g33520R | BraA09g49220R
GO:0000959 - mitochondrial RNA metabolic process	4.75497e-10	4.07432e-08	25.3987	Over	11985	25	151	8	BraA01g29350R | BraA01g33690R | BraA03g13950R | BraA03g36290R | BraA04g24290R | BraA05g11520R | BraA05g30530R | BraA07g32420R
GO:0034660 - ncRNA metabolic process	4.84077e-10	4.07432e-08	6.78043	Over	11985	199	151	17	BraA01g10190R | BraA02g04490R | BraA02g11560R | BraA02g18270R | BraA03g23080R | BraA03g23380R | BraA03g25730R | BraA03g34460R | BraA05g15250R | BraA05g19390R | BraA05g31680R | BraA06g33690R | BraA09g04710R | BraA09g49220R | BraA09g61870R | BraA10g22320R | BraA10g23760R
GO:0034470 - ncRNA processing	5.45677e-10	4.23949e-08	7.99036	Over	11985	149	151	15	BraA01g10190R | BraA02g04490R | BraA02g11560R | BraA02g18270R | BraA03g23080R | BraA03g23380R | BraA03g25730R | BraA05g15250R | BraA05g19390R | BraA05g31680R | BraA06g33690R | BraA09g04710R | BraA09g49220R | BraA10g22320R | BraA10g23760R
GO:0080156 - mitochondrial mRNA modification	1.94578e-09	1.31016e-07	29.2419	Over	11985	19	151	7	BraA01g29350R | BraA01g33690R | BraA03g13950R | BraA03g36290R | BraA04g24290R | BraA05g11520R | BraA05g30530R
GO:1900864 - mitochondrial RNA modification	1.94578e-09	1.31016e-07	29.2419	Over	11985	19	151	7	BraA01g29350R | BraA01g33690R | BraA03g13950R | BraA03g36290R | BraA04g24290R | BraA05g11520R | BraA05g30530R
GO:0006396 - RNA processing	2.91564e-09	1.8405e-07	5.29139	Over	11985	285	151	19	BraA01g01940R | BraA01g24130R | BraA01g32460R | BraA04g21650R | BraA05g07470R | BraA05g15250R | BraA05g31680R | BraA05g35160R | BraA06g01060R | BraA06g01350R | BraA06g29330R | BraA06g37630R | BraA07g17510R | BraA07g19160R | BraA08g05560R | BraA08g33520R | BraA09g49220R | BraA09g60050R | BraA10g06840R
GO:0042254 - ribosome biogenesis	6.01922e-09	3.57613e-07	6.1948	Over	11985	205	151	16	BraA01g10190R | BraA02g04490R | BraA02g18270R | BraA03g23080R | BraA04g26270R | BraA05g15250R | BraA05g19390R | BraA05g31680R | BraA06g12340R | BraA06g33690R | BraA08g05560R | BraA09g04710R | BraA09g49220R | BraA10g02870R | BraA10g05740R | BraA10g06840R
GO:0016556 - mRNA modification	1.7423e-08	9.77625e-07	22.2238	Over	11985	25	151	7	BraA01g29350R | BraA01g33690R | BraA03g13950R | BraA03g36290R | BraA04g24290R | BraA05g11520R | BraA05g30530R
GO:0035246 - peptidyl-arginine N-methylation	2.42204e-08	1.22313e-06	79.3709	Over	11985	4	151	4	BraA02g40730R | BraA03g55660R | BraA05g36100R | BraA08g17770R
GO:0035247 - peptidyl-arginine omega-N-methylation	2.42204e-08	1.22313e-06	79.3709	Over	11985	4	151	4	BraA02g40730R | BraA03g55660R | BraA05g36100R | BraA08g17770R
GO:0010467 - gene expression	2.89509e-08	1.3924e-06	2.01521	Over	11985	2245	151	57	BraA01g01940R | BraA01g16280R | BraA01g24130R | BraA01g27430R | BraA01g30540R | BraA01g32460R | BraA02g04490R | BraA02g07160R | BraA02g32870R | BraA02g40730R | BraA02g44580R | BraA03g24720R | BraA03g25730R | BraA03g34460R | BraA03g41340R | BraA03g42840R | BraA03g55660R | BraA04g12080R | BraA04g20330R | BraA04g21650R | BraA05g03630R | BraA05g07470R | BraA05g15250R | BraA05g28560R | BraA05g31330R |…
GO:0044260 - cellular macromolecule metabolic process	3.27534e-08	1.50368e-06	1.61866	Over	11985	4217	151	86	BraA01g01940R | BraA01g10190R | BraA01g16280R | BraA01g24130R | BraA01g27430R | BraA01g29350R | BraA01g30540R | BraA01g32460R | BraA01g33690R | BraA02g04490R | BraA02g06460R | BraA02g07160R | BraA02g10290R | BraA02g11560R | BraA02g18270R | BraA02g21270R | BraA02g32870R | BraA02g40730R | BraA02g44580R | BraA03g13950R | BraA03g23080R | BraA03g23380R | BraA03g24720R | BraA03g25730R | BraA03g31430R |…
GO:0022613 - ribonucleoprotein complex biogenesis	7.49652e-08	3.29195e-06	5.1834	Over	11985	245	151	16	BraA01g10190R | BraA02g04490R | BraA02g18270R | BraA03g23080R | BraA04g26270R | BraA05g15250R | BraA05g19390R | BraA05g31680R | BraA06g12340R | BraA06g33690R | BraA08g05560R | BraA09g04710R | BraA09g49220R | BraA10g02870R | BraA10g05740R | BraA10g06840R
GO:0018195 - peptidyl-arginine modification	1.19913e-07	4.8445e-06	63.4967	Over	11985	5	151	4	BraA02g40730R | BraA03g55660R | BraA05g36100R | BraA08g17770R
GO:0018216 - peptidyl-arginine methylation	1.19913e-07	4.8445e-06	63.4967	Over	11985	5	151	4	BraA02g40730R | BraA03g55660R | BraA05g36100R | BraA08g17770R
GO:0006364 - rRNA processing	3.68176e-07	1.43022e-05	8.18256	Over	11985	97	151	10	BraA01g10190R | BraA02g04490R | BraA02g18270R | BraA03g23080R | BraA05g15250R | BraA05g19390R | BraA05g31680R | BraA06g33690R | BraA09g04710R | BraA09g49220R
GO:0043414 - macromolecule methylation	4.46389e-07	1.66983e-05	8.01726	Over	11985	99	151	10	BraA01g01940R | BraA01g10190R | BraA02g06460R | BraA02g40730R | BraA03g23380R | BraA03g55660R | BraA05g15250R | BraA05g36100R | BraA08g17770R | BraA09g52800R
GO:0016072 - rRNA metabolic process	5.90975e-07	2.13173e-05	7.78146	Over	11985	102	151	10	BraA01g10190R | BraA02g04490R | BraA02g18270R | BraA03g23080R | BraA05g15250R | BraA05g19390R | BraA05g31680R | BraA06g33690R | BraA09g04710R | BraA09g49220R
GO:0043170 - macromolecule metabolic process	1.70458e-06	5.93664e-05	1.49625	Over	11985	4562	151	86	BraA01g01940R | BraA01g10190R | BraA01g16280R | BraA01g24130R | BraA01g27430R | BraA01g29350R | BraA01g30540R | BraA01g32460R | BraA01g33690R | BraA02g04490R | BraA02g06460R | BraA02g07160R | BraA02g10290R | BraA02g11560R | BraA02g18270R | BraA02g21270R | BraA02g32870R | BraA02g40730R | BraA02g44580R | BraA03g13950R | BraA03g23080R | BraA03g23380R | BraA03g24720R | BraA03g25730R | BraA03g31430R |…
GO:0032259 - methylation	2.6448e-05	0.000890417	4.61947	Over	11985	189	151	11	BraA01g01940R | BraA01g08480R | BraA01g10190R | BraA02g06460R | BraA02g40730R | BraA03g23380R | BraA03g55660R | BraA05g15250R | BraA05g36100R | BraA08g17770R | BraA09g52800R
GO:0050896 - response to stimulus	2.81296e-05	0.00091648	0.565857	Under	11985	4208	151	30	BraA01g08480R | BraA01g24130R | BraA01g34920R | BraA02g04490R | BraA02g06460R | BraA02g10290R | BraA02g21270R | BraA03g19100R | BraA03g24720R | BraA03g25730R | BraA03g25780R | BraA03g55660R | BraA05g03630R | BraA05g19040R | BraA05g27870R | BraA05g32960R | BraA05g34830R | BraA05g36100R | BraA06g01060R | BraA06g01350R | BraA06g20240R | BraA06g32700R | BraA07g32890R | BraA08g17770R | BraA08g27960R |…
GO:0006479 - protein methylation	4.57102e-05	0.00139901	9.15818	Over	11985	52	151	6	BraA02g06460R | BraA02g40730R | BraA03g55660R | BraA05g15250R | BraA05g36100R | BraA08g17770R
GO:0008213 - protein alkylation	4.57102e-05	0.00139901	9.15818	Over	11985	52	151	6	BraA02g06460R | BraA02g40730R | BraA03g55660R | BraA05g15250R | BraA05g36100R | BraA08g17770R
GO:0016554 - cytidine to uridine editing	6.61245e-05	0.00196429	34.0161	Over	11985	7	151	3	BraA01g29350R | BraA03g36290R | BraA05g30530R
GO:0006399 - tRNA metabolic process	6.99065e-05	0.0020173	6.85921	Over	11985	81	151	7	BraA02g11560R | BraA03g23380R | BraA03g25730R | BraA03g34460R | BraA09g61870R | BraA10g22320R | BraA10g23760R
GO:0016553 - base conversion or substitution editing	0.000104821	0.00294082	29.7641	Over	11985	8	151	3	BraA01g29350R | BraA03g36290R | BraA05g30530R
GO:0046131 - pyrimidine ribonucleoside metabolic process	0.000148428	0.00346252	14.4311	Over	11985	22	151	4	BraA02g21270R | BraA06g28970R | BraA07g32890R | BraA10g23760R
GO:0009157 - deoxyribonucleoside monophosphate biosynthetic process	0.000157699	0.00346252	79.3709	Over	11985	2	151	2	BraA02g21740R | BraA07g34820R
GO:0009162 - deoxyribonucleoside monophosphate metabolic process	0.000157699	0.00346252	79.3709	Over	11985	2	151	2	BraA02g21740R | BraA07g34820R
GO:0019919 - peptidyl-arginine methylation, to asymmetrical-dimethyl arginine	0.000157699	0.00346252	79.3709	Over	11985	2	151	2	BraA02g40730R | BraA05g36100R
GO:0034970 - histone H3-R2 methylation	0.000157699	0.00346252	79.3709	Over	11985	2	151	2	BraA02g40730R | BraA05g36100R
GO:0034971 - histone H3-R17 methylation	0.000157699	0.00346252	79.3709	Over	11985	2	151	2	BraA02g40730R | BraA05g36100R
GO:0034972 - histone H3-R26 methylation	0.000157699	0.00346252	79.3709	Over	11985	2	151	2	BraA02g40730R | BraA05g36100R
GO:0019918 - peptidyl-arginine methylation, to symmetrical-dimethyl arginine	0.000157699	0.00346252	79.3709	Over	11985	2	151	2	BraA03g55660R | BraA08g17770R
GO:0010220 - positive regulation of vernalization response	0.000157699	0.00346252	79.3709	Over	11985	2	151	2	BraA03g55660R | BraA08g17770R
GO:0010219 - regulation of vernalization response	0.000157699	0.00346252	79.3709	Over	11985	2	151	2	BraA03g55660R | BraA08g17770R
GO:0001510 - RNA methylation	0.000211427	0.00454342	13.2285	Over	11985	24	151	4	BraA01g01940R | BraA01g10190R | BraA03g23380R | BraA09g52800R
GO:0008033 - tRNA processing	0.000217123	0.00456864	9.01942	Over	11985	44	151	5	BraA02g11560R | BraA03g23380R | BraA03g25730R | BraA10g22320R | BraA10g23760R
GO:0044238 - primary metabolic process	0.000279563	0.00576242	1.28797	Over	11985	5916	151	96	BraA01g01940R | BraA01g10190R | BraA01g16280R | BraA01g24130R | BraA01g27430R | BraA01g29350R | BraA01g30540R | BraA01g32460R | BraA01g33690R | BraA02g04490R | BraA02g05180R | BraA02g06460R | BraA02g07160R | BraA02g10290R | BraA02g11560R | BraA02g18270R | BraA02g21270R | BraA02g21740R | BraA02g32870R | BraA02g40730R | BraA02g44580R | BraA03g13950R | BraA03g23080R | BraA03g23380R | BraA03g24720R |…
GO:1902589 - single-organism organelle organization	0.000339423	0.00685635	2.90128	Over	11985	383	151	14	BraA02g06460R | BraA02g40730R | BraA03g41340R | BraA04g05030R | BraA05g02470R | BraA05g15250R | BraA05g36100R | BraA07g24800R | BraA07g32420R | BraA07g32550R | BraA07g32610R | BraA09g41550R | BraA09g44720R | BraA10g03870R
GO:0006397 - mRNA processing	0.000451463	0.0084619	3.96854	Over	11985	180	151	9	BraA01g32460R | BraA04g21650R | BraA05g07470R | BraA05g35160R | BraA06g01060R | BraA06g01350R | BraA06g29330R | BraA06g37630R | BraA08g33520R
GO:0044085 - cellular component biogenesis	0.000456718	0.0084619	2.28077	Over	11985	696	151	20	BraA01g10190R | BraA02g04490R | BraA02g18270R | BraA03g23080R | BraA03g42840R | BraA04g05030R | BraA04g26270R | BraA05g02470R | BraA05g15250R | BraA05g19390R | BraA05g31680R | BraA06g12340R | BraA06g33690R | BraA08g05560R | BraA09g04710R | BraA09g44720R | BraA09g49220R | BraA10g02870R | BraA10g05740R | BraA10g06840R
GO:0009607 - response to biotic stimulus	0.000459101	0.0084619	0.102679	Under	11985	773	151	1	BraA05g32960R
GO:0034969 - histone arginine methylation	0.000469175	0.0084619	52.9139	Over	11985	3	151	2	BraA02g40730R | BraA05g36100R
GO:0045694 - regulation of embryo sac egg cell differentiation	0.000469175	0.0084619	52.9139	Over	11985	3	151	2	BraA06g37630R | BraA08g33520R
GO:0009662 - etioplast organization	0.000469175	0.0084619	52.9139	Over	11985	3	151	2	BraA07g32550R | BraA07g32610R
GO:0043412 - macromolecule modification	0.000486857	0.00862676	1.7638	Over	11985	1575	151	35	BraA01g01940R | BraA01g10190R | BraA01g16280R | BraA01g29350R | BraA01g33690R | BraA02g06460R | BraA02g40730R | BraA03g13950R | BraA03g23380R | BraA03g24720R | BraA03g25730R | BraA03g31430R | BraA03g36290R | BraA03g42840R | BraA03g55660R | BraA04g11180R | BraA04g24290R | BraA05g11520R | BraA05g15250R | BraA05g26470R | BraA05g30530R | BraA05g36100R | BraA06g01060R | BraA06g01350R | BraA06g23510R |…
GO:0006213 - pyrimidine nucleoside metabolic process	0.000514188	0.00895397	10.5828	Over	11985	30	151	4	BraA02g21270R | BraA06g28970R | BraA07g32890R | BraA10g23760R
GO:0044699 - single-organism process	0.000525183	0.00899042	0.751871	Under	11985	6545	151	62	BraA01g16190R | BraA01g16280R | BraA01g28350R | BraA01g32460R | BraA01g34920R | BraA02g04490R | BraA02g05180R | BraA02g06460R | BraA02g11560R | BraA02g17370R | BraA02g18270R | BraA02g21270R | BraA02g21740R | BraA02g40730R | BraA03g23080R | BraA03g24720R | BraA03g25730R | BraA03g25780R | BraA03g34460R | BraA03g41340R | BraA03g42840R | BraA03g47410R | BraA03g55660R | BraA04g05030R | BraA05g02470R |…
GO:0006950 - response to stress	0.000544058	0.0091583	0.480619	Under	11985	2312	151	14	BraA01g08480R | BraA01g24130R | BraA02g10290R | BraA03g19100R | BraA03g55660R | BraA05g32960R | BraA05g36100R | BraA06g01060R | BraA06g01350R | BraA07g32890R | BraA08g17770R | BraA08g27960R | BraA10g11700R | BraA10g23760R
GO:0043207 - response to external biotic stimulus	0.000593999	0.00979558	0.105546	Under	11985	752	151	1	BraA05g32960R
GO:0051707 - response to other organism	0.000601313	0.00979558	0.105687	Under	11985	751	151	1	BraA05g32960R

## Sheet: HC_07
	P-Value	Adj_P-Value	Fold Enrichment	Enrichment Direction	TotalInRef	AnnInRef	TotalInTest	AnnInTest	GenesWithAnn
GO:0006468 - protein phosphorylation	1.51828e-11	4.40454e-08	1.64512	Over	11985	617	1901	161	BraA01g01380R | BraA01g01670R | BraA01g01720R | BraA01g03000R | BraA01g06670R | BraA01g06730R | BraA01g06800R | BraA01g06830R | BraA01g06930R | BraA01g08160R | BraA01g08430R | BraA01g20910R | BraA01g24650R | BraA01g33270R | BraA01g33890R | BraA02g01090R | BraA02g05240R | BraA02g12640R | BraA02g19850R | BraA02g20830R | BraA02g21000R | BraA02g21440R | BraA02g26420R | BraA02g30180R | BraA02g36320R |…
GO:0006412 - translation	1.7799e-10	2.02143e-07	0.366368	Under	11985	413	1901	24	BraA01g09430R | BraA01g09890R | BraA02g08530R | BraA02g16110R | BraA02g41060R | BraA02g44870R | BraA03g51860R | BraA03g55350R | BraA04g12070R | BraA05g11470R | BraA05g13650R | BraA05g33930R | BraA06g41340R | BraA07g16630R | BraA07g17000R | BraA07g26810R | BraA07g36500R | BraA08g01910R | BraA08g13650R | BraA09g05590R | BraA09g33620R | BraA09g47330R | BraA10g29150R | BraA10g31930R
GO:0015979 - photosynthesis	2.3485e-10	2.02143e-07	0.237014	Under	11985	266	1901	10	BraA01g35610R | BraA02g16110R | BraA05g30470R | BraA06g11620R | BraA07g13670R | BraA07g21000R | BraA07g38850R | BraA08g02420R | BraA08g30810R | BraA09g49850R
GO:0006464 - cellular protein modification process	3.83864e-10	2.02143e-07	1.36844	Over	11985	1419	1901	308	BraA01g01380R | BraA01g01670R | BraA01g01720R | BraA01g03000R | BraA01g03810R | BraA01g03880R | BraA01g06670R | BraA01g06730R | BraA01g06800R | BraA01g06830R | BraA01g06930R | BraA01g08150R | BraA01g08160R | BraA01g08430R | BraA01g09680R | BraA01g12800R | BraA01g14670R | BraA01g20150R | BraA01g20910R | BraA01g24650R | BraA01g29130R | BraA01g33270R | BraA01g33890R | BraA02g01090R | BraA02g01810R |…
GO:0036211 - protein modification process	3.83864e-10	2.02143e-07	1.36844	Over	11985	1419	1901	308	BraA01g01380R | BraA01g01670R | BraA01g01720R | BraA01g03000R | BraA01g03810R | BraA01g03880R | BraA01g06670R | BraA01g06730R | BraA01g06800R | BraA01g06830R | BraA01g06930R | BraA01g08150R | BraA01g08160R | BraA01g08430R | BraA01g09680R | BraA01g12800R | BraA01g14670R | BraA01g20150R | BraA01g20910R | BraA01g24650R | BraA01g29130R | BraA01g33270R | BraA01g33890R | BraA02g01090R | BraA02g01810R |…
GO:0016310 - phosphorylation	4.18083e-10	2.02143e-07	1.48768	Over	11985	873	1901	206	BraA01g01380R | BraA01g01670R | BraA01g01720R | BraA01g03000R | BraA01g06670R | BraA01g06730R | BraA01g06800R | BraA01g06830R | BraA01g06930R | BraA01g08160R | BraA01g08430R | BraA01g20910R | BraA01g24650R | BraA01g33270R | BraA01g33890R | BraA02g01090R | BraA02g05240R | BraA02g08570R | BraA02g12640R | BraA02g18050R | BraA02g18930R | BraA02g19850R | BraA02g20730R | BraA02g20830R | BraA02g21000R |…
GO:0022613 - ribonucleoprotein complex biogenesis	4.16847e-09	1.72753e-06	0.25733	Under	11985	245	1901	10	BraA01g05930R | BraA02g31630R | BraA02g41060R | BraA02g43810R | BraA02g44870R | BraA05g11470R | BraA08g13650R | BraA09g05680R | BraA09g11400R | BraA09g11490R
GO:0042254 - ribosome biogenesis	9.61784e-09	3.48767e-06	0.215278	Under	11985	205	1901	7	BraA02g31630R | BraA02g41060R | BraA02g43810R | BraA02g44870R | BraA05g11470R | BraA08g13650R | BraA09g11490R
GO:0043412 - macromolecule modification	2.71956e-08	8.76604e-06	1.30495	Over	11985	1575	1901	326	BraA01g01380R | BraA01g01670R | BraA01g01720R | BraA01g03000R | BraA01g03230R | BraA01g03810R | BraA01g03880R | BraA01g06670R | BraA01g06730R | BraA01g06800R | BraA01g06830R | BraA01g06930R | BraA01g08150R | BraA01g08160R | BraA01g08430R | BraA01g09680R | BraA01g12800R | BraA01g14670R | BraA01g20150R | BraA01g20910R | BraA01g24650R | BraA01g28920R | BraA01g29130R | BraA01g33270R | BraA01g33890R |…
GO:0009058 - biosynthetic process	3.32133e-08	9.63518e-06	0.823914	Under	11985	3474	1901	454	BraA01g01130R | BraA01g01310R | BraA01g02280R | BraA01g02290R | BraA01g02340R | BraA01g02450R | BraA01g03230R | BraA01g04320R | BraA01g05560R | BraA01g08770R | BraA01g08920R | BraA01g08940R | BraA01g09430R | BraA01g09680R | BraA01g09890R | BraA01g13080R | BraA01g14670R | BraA01g15150R | BraA01g16800R | BraA01g19530R | BraA01g20150R | BraA01g22670R | BraA01g24080R | BraA01g25580R | BraA01g27220R |…
GO:0044249 - cellular biosynthetic process	5.41843e-08	1.42899e-05	0.81827	Under	11985	3236	1901	420	BraA01g01310R | BraA01g02280R | BraA01g02290R | BraA01g02340R | BraA01g03230R | BraA01g04320R | BraA01g05560R | BraA01g08770R | BraA01g08940R | BraA01g09430R | BraA01g09680R | BraA01g09890R | BraA01g13080R | BraA01g14670R | BraA01g15150R | BraA01g16800R | BraA01g19530R | BraA01g20150R | BraA01g22670R | BraA01g24080R | BraA01g27220R | BraA01g28920R | BraA01g29340R | BraA01g30130R | BraA01g30640R |…
GO:1901576 - organic substance biosynthetic process	9.00735e-08	2.17753e-05	0.823666	Under	11985	3299	1901	431	BraA01g01130R | BraA01g01310R | BraA01g02280R | BraA01g02290R | BraA01g02340R | BraA01g02450R | BraA01g03230R | BraA01g04320R | BraA01g05560R | BraA01g08770R | BraA01g08920R | BraA01g08940R | BraA01g09430R | BraA01g09680R | BraA01g09890R | BraA01g13080R | BraA01g14670R | BraA01g15150R | BraA01g16800R | BraA01g19530R | BraA01g20150R | BraA01g22670R | BraA01g24080R | BraA01g27220R | BraA01g28920R |…
GO:0006796 - phosphate-containing compound metabolic process	2.63622e-07	5.88282e-05	1.3101	Over	11985	1333	1901	277	BraA01g01380R | BraA01g01670R | BraA01g01720R | BraA01g03000R | BraA01g04320R | BraA01g06670R | BraA01g06730R | BraA01g06800R | BraA01g06830R | BraA01g06930R | BraA01g08160R | BraA01g08430R | BraA01g09870R | BraA01g14670R | BraA01g20910R | BraA01g24650R | BraA01g33270R | BraA01g33890R | BraA01g35610R | BraA02g01090R | BraA02g05140R | BraA02g05240R | BraA02g08570R | BraA02g10500R | BraA02g12640R |…
GO:0006793 - phosphorus metabolic process	4.50338e-07	9.33165e-05	1.30102	Over	11985	1352	1901	279	BraA01g01380R | BraA01g01670R | BraA01g01720R | BraA01g03000R | BraA01g04320R | BraA01g06670R | BraA01g06730R | BraA01g06800R | BraA01g06830R | BraA01g06930R | BraA01g08160R | BraA01g08430R | BraA01g09870R | BraA01g14670R | BraA01g20910R | BraA01g24650R | BraA01g33270R | BraA01g33890R | BraA01g35610R | BraA02g01090R | BraA02g05140R | BraA02g05240R | BraA02g08570R | BraA02g10500R | BraA02g12640R |…
GO:0006091 - generation of precursor metabolites and energy	9.50068e-07	0.000183743	0.428466	Under	11985	309	1901	21	BraA01g09870R | BraA02g15900R | BraA04g16130R | BraA04g30160R | BraA04g31820R | BraA05g30470R | BraA05g35080R | BraA06g11620R | BraA06g13660R | BraA06g14780R | BraA07g04290R | BraA07g13670R | BraA07g30160R | BraA07g38850R | BraA07g40220R | BraA08g02420R | BraA08g05750R | BraA09g47030R | BraA10g02700R | BraA10g07050R | BraA10g26980R
GO:0019684 - photosynthesis, light reaction	1.34353e-06	0.000243599	0.186802	Under	11985	135	1901	4	BraA05g30470R | BraA06g11620R | BraA07g13670R | BraA07g38850R
GO:0006887 - exocytosis	1.01067e-05	0.00165018	2.56853	Over	11985	54	1901	22	BraA01g14290R | BraA02g10630R | BraA02g12470R | BraA02g12530R | BraA02g12540R | BraA03g06000R | BraA03g10500R | BraA03g33830R | BraA04g06350R | BraA05g33430R | BraA06g09370R | BraA06g22310R | BraA07g19880R | BraA07g25410R | BraA07g25740R | BraA08g17170R | BraA08g30730R | BraA09g42870R | BraA09g43400R | BraA09g60410R | BraA10g05940R | BraA10g30830R
GO:0044085 - cellular component biogenesis	1.06546e-05	0.00165018	0.652198	Under	11985	696	1901	72	BraA01g05930R | BraA01g08390R | BraA01g25380R | BraA01g27090R | BraA01g29910R | BraA02g02780R | BraA02g03110R | BraA02g05140R | BraA02g09060R | BraA02g10500R | BraA02g14890R | BraA02g14980R | BraA02g18420R | BraA02g26960R | BraA02g31260R | BraA02g31630R | BraA02g40120R | BraA02g41060R | BraA02g43810R | BraA02g44870R | BraA03g05560R | BraA03g08930R | BraA03g12480R | BraA03g30400R | BraA03g35770R |…
GO:0022900 - electron transport chain	1.08078e-05	0.00165018	0.131345	Under	11985	96	1901	2	BraA07g13670R | BraA07g38850R
GO:0070085 - glycosylation	1.20094e-05	0.00174196	2.26318	Over	11985	78	1901	28	BraA01g14670R | BraA02g10500R | BraA02g15570R | BraA03g02980R | BraA03g07140R | BraA03g13510R | BraA03g48630R | BraA04g24470R | BraA05g06450R | BraA05g09870R | BraA05g12410R | BraA06g02880R | BraA06g04110R | BraA06g05850R | BraA06g08550R | BraA06g24700R | BraA07g16050R | BraA07g29410R | BraA07g34150R | BraA07g35960R | BraA08g03220R | BraA08g04220R | BraA09g10160R | BraA09g30010R | BraA09g44760R |…
GO:0006487 - protein N-linked glycosylation	1.37904e-05	0.00183301	3.15229	Over	11985	30	1901	15	BraA03g02980R | BraA03g07140R | BraA03g13510R | BraA03g48630R | BraA05g06450R | BraA06g02880R | BraA06g05850R | BraA06g08550R | BraA07g16050R | BraA07g29410R | BraA08g03220R | BraA09g10160R | BraA09g30010R | BraA10g19410R | BraA10g23250R
GO:0009628 - response to abiotic stimulus	1.39008e-05	0.00183301	0.788981	Under	11985	1734	1901	217	BraA01g01380R | BraA01g03230R | BraA01g03900R | BraA01g09680R | BraA01g15560R | BraA01g20910R | BraA01g22840R | BraA01g24220R | BraA01g25380R | BraA01g28920R | BraA01g30660R | BraA01g31590R | BraA01g32970R | BraA02g02780R | BraA02g03340R | BraA02g04820R | BraA02g06390R | BraA02g10630R | BraA02g17840R | BraA02g22320R | BraA02g23400R | BraA02g26880R | BraA02g31230R | BraA02g42490R | BraA02g42740R |…
GO:0009100 - glycoprotein metabolic process	1.58188e-05	0.00199524	2.23453	Over	11985	79	1901	28	BraA01g14670R | BraA02g15570R | BraA03g02980R | BraA03g07140R | BraA03g13510R | BraA03g42430R | BraA03g48630R | BraA04g19570R | BraA04g24470R | BraA05g06450R | BraA05g09870R | BraA05g12410R | BraA06g02880R | BraA06g04110R | BraA06g05850R | BraA06g08550R | BraA06g24700R | BraA07g16050R | BraA07g29410R | BraA07g34150R | BraA08g03220R | BraA08g04220R | BraA09g10160R | BraA09g30010R | BraA09g44760R |…
GO:0032940 - secretion by cell	2.16045e-05	0.00261144	2.27665	Over	11985	72	1901	26	BraA01g14290R | BraA02g03340R | BraA02g10630R | BraA02g12470R | BraA02g12530R | BraA02g12540R | BraA02g44090R | BraA03g06000R | BraA03g10500R | BraA03g17810R | BraA03g33830R | BraA04g06350R | BraA05g33430R | BraA06g09370R | BraA06g22310R | BraA06g23760R | BraA07g19880R | BraA07g25410R | BraA07g25740R | BraA08g17170R | BraA08g30730R | BraA09g42870R | BraA09g43400R | BraA09g60410R | BraA10g05940R |…
GO:0009416 - response to light stimulus	2.55364e-05	0.00289055	0.656526	Under	11985	653	1901	68	BraA01g01380R | BraA01g31590R | BraA02g02780R | BraA02g04820R | BraA02g22320R | BraA02g31230R | BraA02g42740R | BraA02g45210R | BraA03g05360R | BraA03g20760R | BraA03g20890R | BraA03g23600R | BraA03g29770R | BraA03g32910R | BraA03g32940R | BraA03g36560R | BraA03g53750R | BraA04g18480R | BraA04g25490R | BraA04g27180R | BraA04g29200R | BraA05g02340R | BraA05g02440R | BraA05g04710R | BraA05g05270R |…
GO:0044711 - single-organism biosynthetic process	2.59063e-05	0.00289055	0.769403	Under	11985	1393	1901	170	BraA01g01310R | BraA01g04320R | BraA01g05560R | BraA01g14670R | BraA01g24080R | BraA01g25580R | BraA01g27220R | BraA01g33270R | BraA01g35610R | BraA01g35790R | BraA02g02780R | BraA02g03340R | BraA02g04740R | BraA02g05650R | BraA02g09060R | BraA02g10500R | BraA02g14530R | BraA02g15900R | BraA02g18420R | BraA02g18840R | BraA02g23480R | BraA02g23550R | BraA02g26720R | BraA02g31020R | BraA02g31170R |…
GO:0016072 - rRNA metabolic process	2.86562e-05	0.00307895	0.185429	Under	11985	102	1901	3	BraA02g31630R | BraA02g43810R | BraA09g11490R
GO:0009314 - response to radiation	3.16807e-05	0.00328234	0.66364	Under	11985	665	1901	70	BraA01g01380R | BraA01g31590R | BraA02g02780R | BraA02g04820R | BraA02g22320R | BraA02g31230R | BraA02g42740R | BraA02g45210R | BraA03g05360R | BraA03g20760R | BraA03g20890R | BraA03g23600R | BraA03g29770R | BraA03g32910R | BraA03g32940R | BraA03g36560R | BraA03g53750R | BraA04g18480R | BraA04g25490R | BraA04g27180R | BraA04g29200R | BraA05g02340R | BraA05g02440R | BraA05g04710R | BraA05g05270R |…
GO:0016192 - vesicle-mediated transport	3.44562e-05	0.00338613	1.56557	Over	11985	298	1901	74	BraA01g01380R | BraA01g01670R | BraA01g14290R | BraA01g25380R | BraA02g10630R | BraA02g12470R | BraA02g12530R | BraA02g12540R | BraA02g14890R | BraA02g21210R | BraA02g29550R | BraA02g37510R | BraA02g39470R | BraA03g06000R | BraA03g10500R | BraA03g12630R | BraA03g27990R | BraA03g32920R | BraA03g33830R | BraA03g33950R | BraA03g35770R | BraA03g46850R | BraA03g48060R | BraA03g53750R | BraA03g60510R |…
GO:0006486 - protein glycosylation	3.74464e-05	0.00338613	2.21512	Over	11985	74	1901	26	BraA01g14670R | BraA02g15570R | BraA03g02980R | BraA03g07140R | BraA03g13510R | BraA03g48630R | BraA04g24470R | BraA05g06450R | BraA05g09870R | BraA05g12410R | BraA06g02880R | BraA06g04110R | BraA06g05850R | BraA06g08550R | BraA06g24700R | BraA07g16050R | BraA07g29410R | BraA07g34150R | BraA08g03220R | BraA08g04220R | BraA09g10160R | BraA09g30010R | BraA09g44760R | BraA09g51100R | BraA10g19410R |…
GO:0009101 - glycoprotein biosynthetic process	3.74464e-05	0.00338613	2.21512	Over	11985	74	1901	26	BraA01g14670R | BraA02g15570R | BraA03g02980R | BraA03g07140R | BraA03g13510R | BraA03g48630R | BraA04g24470R | BraA05g06450R | BraA05g09870R | BraA05g12410R | BraA06g02880R | BraA06g04110R | BraA06g05850R | BraA06g08550R | BraA06g24700R | BraA07g16050R | BraA07g29410R | BraA07g34150R | BraA08g03220R | BraA08g04220R | BraA09g10160R | BraA09g30010R | BraA09g44760R | BraA09g51100R | BraA10g19410R |…
GO:0043413 - macromolecule glycosylation	3.74464e-05	0.00338613	2.21512	Over	11985	74	1901	26	BraA01g14670R | BraA02g15570R | BraA03g02980R | BraA03g07140R | BraA03g13510R | BraA03g48630R | BraA04g24470R | BraA05g06450R | BraA05g09870R | BraA05g12410R | BraA06g02880R | BraA06g04110R | BraA06g05850R | BraA06g08550R | BraA06g24700R | BraA07g16050R | BraA07g29410R | BraA07g34150R | BraA08g03220R | BraA08g04220R | BraA09g10160R | BraA09g30010R | BraA09g44760R | BraA09g51100R | BraA10g19410R |…
GO:0010467 - gene expression	3.85186e-05	0.00338613	0.828441	Under	11985	2245	1901	295	BraA01g01720R | BraA01g02280R | BraA01g02290R | BraA01g02340R | BraA01g03160R | BraA01g03230R | BraA01g03940R | BraA01g05930R | BraA01g08430R | BraA01g08770R | BraA01g08940R | BraA01g09430R | BraA01g09680R | BraA01g09890R | BraA01g13080R | BraA01g15150R | BraA01g16430R | BraA01g16800R | BraA01g19530R | BraA01g20150R | BraA01g22670R | BraA01g28920R | BraA01g29340R | BraA01g30640R | BraA01g31640R |…
GO:0006364 - rRNA processing	5.92437e-05	0.00499048	0.194987	Under	11985	97	1901	3	BraA02g31630R | BraA02g43810R | BraA09g11490R
GO:0071840 - cellular component organization or biogenesis	6.02092e-05	0.00499048	0.808096	Under	11985	1771	1901	227	BraA01g01380R | BraA01g01670R | BraA01g03230R | BraA01g05930R | BraA01g07360R | BraA01g08390R | BraA01g10040R | BraA01g14290R | BraA01g20150R | BraA01g24220R | BraA01g25380R | BraA01g27090R | BraA01g29910R | BraA01g31640R | BraA01g36400R | BraA02g01600R | BraA02g02780R | BraA02g03110R | BraA02g05140R | BraA02g08050R | BraA02g09060R | BraA02g09700R | BraA02g10410R | BraA02g10500R | BraA02g10630R |…
GO:0046903 - secretion	6.3079e-05	0.00508312	2.15683	Over	11985	76	1901	26	BraA01g14290R | BraA02g03340R | BraA02g10630R | BraA02g12470R | BraA02g12530R | BraA02g12540R | BraA02g44090R | BraA03g06000R | BraA03g10500R | BraA03g17810R | BraA03g33830R | BraA04g06350R | BraA05g33430R | BraA06g09370R | BraA06g22310R | BraA06g23760R | BraA07g19880R | BraA07g25410R | BraA07g25740R | BraA08g17170R | BraA08g30730R | BraA09g42870R | BraA09g43400R | BraA09g60410R | BraA10g05940R |…
GO:0006829 - zinc II ion transport	6.52595e-05	0.0051167	3.70857	Over	11985	17	1901	10	BraA03g33770R | BraA05g01300R | BraA05g32630R | BraA05g32640R | BraA05g36280R | BraA06g27900R | BraA07g02500R | BraA09g55240R | BraA09g57010R | BraA09g61220R
GO:0006952 - defense response	7.59425e-05	0.00579761	1.29005	Over	11985	909	1901	186	BraA01g03640R | BraA01g03810R | BraA01g03880R | BraA01g06670R | BraA01g06730R | BraA01g06800R | BraA01g06830R | BraA01g06930R | BraA01g07980R | BraA01g08200R | BraA01g09650R | BraA01g09680R | BraA01g15560R | BraA01g16430R | BraA01g24080R | BraA01g25220R | BraA01g26580R | BraA01g28920R | BraA01g30130R | BraA01g32550R | BraA01g33270R | BraA02g03210R | BraA02g04030R | BraA02g12470R | BraA02g12530R |…
GO:0009607 - response to biotic stimulus	9.40016e-05	0.00699228	1.31311	Over	11985	773	1901	161	BraA01g02450R | BraA01g03810R | BraA01g03880R | BraA01g06670R | BraA01g06730R | BraA01g06800R | BraA01g06830R | BraA01g06930R | BraA01g07980R | BraA01g08200R | BraA01g09650R | BraA01g09680R | BraA01g15560R | BraA01g16430R | BraA01g24080R | BraA01g25220R | BraA01g28920R | BraA01g30130R | BraA01g33270R | BraA02g03110R | BraA02g03210R | BraA02g04030R | BraA02g12470R | BraA02g12530R | BraA02g12540R |…
GO:0007166 - cell surface receptor signaling pathway	0.00012469	0.00904312	1.64743	Over	11985	199	1901	52	BraA01g01380R | BraA01g01670R | BraA01g01720R | BraA01g33270R | BraA02g12640R | BraA02g36320R | BraA02g39060R | BraA03g01570R | BraA03g06800R | BraA03g12630R | BraA03g16700R | BraA03g16730R | BraA03g16740R | BraA03g53750R | BraA04g03780R | BraA04g14230R | BraA04g17200R | BraA04g22200R | BraA05g06320R | BraA05g06950R | BraA05g24170R | BraA05g35070R | BraA06g05030R | BraA06g10370R | BraA06g10380R |…
GO:0051707 - response to other organism	0.000138575	0.009805	1.30961	Over	11985	751	1901	156	BraA01g02450R | BraA01g03810R | BraA01g03880R | BraA01g06670R | BraA01g06730R | BraA01g06800R | BraA01g06830R | BraA01g06930R | BraA01g08200R | BraA01g09650R | BraA01g09680R | BraA01g15560R | BraA01g16430R | BraA01g24080R | BraA01g25220R | BraA01g28920R | BraA01g30130R | BraA01g33270R | BraA02g03110R | BraA02g03210R | BraA02g04030R | BraA02g12470R | BraA02g12530R | BraA02g12540R | BraA02g13530R |…

## Sheet: HC_08
	P-Value	Adj_P-Value	Fold Enrichment	Enrichment Direction	TotalInRef	AnnInRef	TotalInTest	AnnInTest	GenesWithAnn

## Sheet: HC_09
	P-Value	Adj_P-Value	Fold Enrichment	Enrichment Direction	TotalInRef	AnnInRef	TotalInTest	AnnInTest	GenesWithAnn
GO:0006412 - translation	8.33486e-07	0.00201787	0.329454	Under	11985	413	1057	12	BraA01g31320R | BraA02g10090R | BraA03g33810R | BraA03g56730R | BraA04g18810R | BraA05g26920R | BraA06g39920R | BraA07g02570R | BraA07g36940R | BraA08g04780R | BraA09g62580R | BraA10g14170R
GO:0009628 - response to abiotic stimulus	7.45884e-06	0.00644108	0.699677	Under	11985	1734	1057	107	BraA01g07310R | BraA01g26350R | BraA01g26480R | BraA01g34000R | BraA01g35290R | BraA01g36300R | BraA02g02770R | BraA02g04090R | BraA02g05370R | BraA02g06080R | BraA02g09770R | BraA02g09780R | BraA02g15500R | BraA02g15770R | BraA02g22870R | BraA02g23350R | BraA02g25990R | BraA02g29680R | BraA02g41770R | BraA02g44570R | BraA03g01260R | BraA03g03830R | BraA03g07130R | BraA03g11610R | BraA03g12750R |…
GO:0006259 - DNA metabolic process	7.98152e-06	0.00644108	1.99821	Over	11985	244	1057	43	BraA01g11140R | BraA01g13210R | BraA01g16060R | BraA01g20550R | BraA01g23440R | BraA01g36300R | BraA02g07650R | BraA02g12380R | BraA02g12840R | BraA02g25990R | BraA02g39150R | BraA03g02000R | BraA03g15910R | BraA03g26320R | BraA03g33980R | BraA03g40710R | BraA04g18810R | BraA04g27170R | BraA04g28510R | BraA05g29060R | BraA05g30570R | BraA05g32790R | BraA06g01290R | BraA06g03910R | BraA06g09340R |…

## Sheet: HC_10
	P-Value	Adj_P-Value	Fold Enrichment	Enrichment Direction	TotalInRef	AnnInRef	TotalInTest	AnnInTest	GenesWithAnn
GO:0019761 - glucosinolate biosynthetic process	1.35034e-13	1.06992e-10	5.48242	Over	11985	52	1051	25	BraA01g06640R | BraA02g06290R | BraA02g28690R | BraA02g43660R | BraA02g44060R | BraA03g03990R | BraA03g04020R | BraA03g04050R | BraA03g27380R | BraA03g28400R | BraA03g38550R | BraA03g42970R | BraA03g42980R | BraA03g45360R | BraA04g09110R | BraA04g09410R | BraA04g28740R | BraA05g26150R | BraA06g12050R | BraA07g36310R | BraA08g30530R | BraA09g02990R | BraA09g10830R | BraA09g26230R | BraA09g37570R
GO:0016144 - S-glycoside biosynthetic process	1.35034e-13	1.06992e-10	5.48242	Over	11985	52	1051	25	BraA01g06640R | BraA02g06290R | BraA02g28690R | BraA02g43660R | BraA02g44060R | BraA03g03990R | BraA03g04020R | BraA03g04050R | BraA03g27380R | BraA03g28400R | BraA03g38550R | BraA03g42970R | BraA03g42980R | BraA03g45360R | BraA04g09110R | BraA04g09410R | BraA04g28740R | BraA05g26150R | BraA06g12050R | BraA07g36310R | BraA08g30530R | BraA09g02990R | BraA09g10830R | BraA09g26230R | BraA09g37570R
GO:0019758 - glycosinolate biosynthetic process	1.35034e-13	1.06992e-10	5.48242	Over	11985	52	1051	25	BraA01g06640R | BraA02g06290R | BraA02g28690R | BraA02g43660R | BraA02g44060R | BraA03g03990R | BraA03g04020R | BraA03g04050R | BraA03g27380R | BraA03g28400R | BraA03g38550R | BraA03g42970R | BraA03g42980R | BraA03g45360R | BraA04g09110R | BraA04g09410R | BraA04g28740R | BraA05g26150R | BraA06g12050R | BraA07g36310R | BraA08g30530R | BraA09g02990R | BraA09g10830R | BraA09g26230R | BraA09g37570R
GO:0016143 - S-glycoside metabolic process	4.69497e-08	1.85999e-05	3.07015	Over	11985	104	1051	28	BraA01g06640R | BraA02g06290R | BraA02g28690R | BraA02g43660R | BraA02g44060R | BraA02g45180R | BraA03g03990R | BraA03g04020R | BraA03g04050R | BraA03g27380R | BraA03g28400R | BraA03g38550R | BraA03g42970R | BraA03g42980R | BraA03g45360R | BraA04g09110R | BraA04g09410R | BraA04g28740R | BraA05g26150R | BraA06g12050R | BraA06g34640R | BraA07g12270R | BraA07g36310R | BraA08g30530R | BraA09g02990R |…
GO:0019757 - glycosinolate metabolic process	4.69497e-08	1.85999e-05	3.07015	Over	11985	104	1051	28	BraA01g06640R | BraA02g06290R | BraA02g28690R | BraA02g43660R | BraA02g44060R | BraA02g45180R | BraA03g03990R | BraA03g04020R | BraA03g04050R | BraA03g27380R | BraA03g28400R | BraA03g38550R | BraA03g42970R | BraA03g42980R | BraA03g45360R | BraA04g09110R | BraA04g09410R | BraA04g28740R | BraA05g26150R | BraA06g12050R | BraA06g34640R | BraA07g12270R | BraA07g36310R | BraA08g30530R | BraA09g02990R |…
GO:0019760 - glucosinolate metabolic process	4.69497e-08	1.85999e-05	3.07015	Over	11985	104	1051	28	BraA01g06640R | BraA02g06290R | BraA02g28690R | BraA02g43660R | BraA02g44060R | BraA02g45180R | BraA03g03990R | BraA03g04020R | BraA03g04050R | BraA03g27380R | BraA03g28400R | BraA03g38550R | BraA03g42970R | BraA03g42980R | BraA03g45360R | BraA04g09110R | BraA04g09410R | BraA04g28740R | BraA05g26150R | BraA06g12050R | BraA06g34640R | BraA07g12270R | BraA07g36310R | BraA08g30530R | BraA09g02990R |…
GO:1901659 - glycosyl compound biosynthetic process	6.31679e-07	0.0002145	2.63156	Over	11985	130	1051	30	BraA01g06640R | BraA02g06290R | BraA02g28690R | BraA02g43660R | BraA02g44060R | BraA02g44670R | BraA03g03990R | BraA03g04020R | BraA03g04050R | BraA03g27380R | BraA03g28400R | BraA03g38550R | BraA03g42970R | BraA03g42980R | BraA03g45360R | BraA04g09110R | BraA04g09410R | BraA04g28740R | BraA05g22470R | BraA05g26150R | BraA06g12050R | BraA07g36310R | BraA07g40970R | BraA08g30530R | BraA09g02990R |…
GO:0044699 - single-organism process	1.54554e-06	0.000459219	1.12553	Over	11985	6545	1051	646	BraA01g01010R | BraA01g01210R | BraA01g02930R | BraA01g05040R | BraA01g05320R | BraA01g06090R | BraA01g06180R | BraA01g06570R | BraA01g06640R | BraA01g08070R | BraA01g08240R | BraA01g08860R | BraA01g10220R | BraA01g11910R | BraA01g12370R | BraA01g12620R | BraA01g15980R | BraA01g16590R | BraA01g16890R | BraA01g17490R | BraA01g18630R | BraA01g18990R | BraA01g19900R | BraA01g20880R | BraA01g22590R |…
GO:0044272 - sulfur compound biosynthetic process	1.96012e-06	0.00051769	2.38173	Over	11985	158	1051	33	BraA01g06640R | BraA02g06290R | BraA02g28690R | BraA02g43660R | BraA02g44060R | BraA03g03990R | BraA03g04020R | BraA03g04050R | BraA03g27380R | BraA03g28400R | BraA03g31020R | BraA03g38550R | BraA03g42970R | BraA03g42980R | BraA03g45360R | BraA04g01620R | BraA04g04200R | BraA04g09110R | BraA04g09410R | BraA04g28740R | BraA05g23150R | BraA05g26150R | BraA05g38660R | BraA06g12050R | BraA06g28840R |…
GO:1901605 - alpha-amino acid metabolic process	6.23424e-06	0.00148188	1.96464	Over	11985	267	1051	46	BraA01g16590R | BraA02g06290R | BraA02g07450R | BraA02g08860R | BraA02g14640R | BraA02g22450R | BraA02g46750R | BraA03g07080R | BraA03g13330R | BraA03g14920R | BraA03g14930R | BraA03g18640R | BraA03g31020R | BraA03g41090R | BraA03g45360R | BraA03g57620R | BraA04g01620R | BraA04g04200R | BraA04g09410R | BraA04g30770R | BraA05g06820R | BraA05g10040R | BraA05g18680R | BraA05g22090R | BraA05g23150R |…
GO:0006412 - translation	8.9981e-06	0.00194441	0.386557	Under	11985	413	1051	14	BraA01g01210R | BraA01g35590R | BraA02g10900R | BraA02g12180R | BraA02g40740R | BraA03g58040R | BraA05g16370R | BraA05g39760R | BraA06g33060R | BraA06g33610R | BraA07g20940R | BraA08g28690R | BraA09g20110R | BraA10g14430R
GO:1901607 - alpha-amino acid biosynthetic process	2.35697e-05	0.00466876	2.15923	Over	11985	169	1051	32	BraA01g16590R | BraA02g06290R | BraA02g07450R | BraA02g14640R | BraA02g22450R | BraA03g07080R | BraA03g14920R | BraA03g14930R | BraA03g18640R | BraA03g31020R | BraA03g41090R | BraA04g01620R | BraA04g04200R | BraA04g09410R | BraA04g30770R | BraA05g06820R | BraA05g18680R | BraA05g23150R | BraA05g25310R | BraA05g37050R | BraA05g38660R | BraA06g10990R | BraA06g28840R | BraA06g34050R | BraA07g26250R |…
GO:0019538 - protein metabolic process	3.04631e-05	0.00557007	0.764448	Under	11985	2342	1051	157	BraA01g01210R | BraA01g02550R | BraA01g02930R | BraA01g04530R | BraA01g06180R | BraA01g06440R | BraA01g06660R | BraA01g08070R | BraA01g08610R | BraA01g14460R | BraA01g15980R | BraA01g16720R | BraA01g20720R | BraA01g20880R | BraA01g29180R | BraA01g35590R | BraA02g05050R | BraA02g07660R | BraA02g08860R | BraA02g10900R | BraA02g12180R | BraA02g14150R | BraA02g14160R | BraA02g15540R | BraA02g31490R |…

[truncated: 15 more sheets: LD_01, LD_02, LD_03, LD_04, LD_05, LD_06, LD_07, LD_08, LD_09, LD_10, LD_11, LD_12, LD_13, LD_14, Differential_Pattern]
