# Supplementary material for: Expansion of the circadian transcriptome in Brassica rapa and genome-wide diversification of paralog expression patterns
Source: eLife. 2020 Sep 30;9:e58993. doi: 10.7554/eLife.58993 (PMC7655105; doi:10.7554/eLife.58993)
Supplement: Supplementary file 3. — WGCNA modules generated with cycling genes from a combined LD and HC dataset were analyzed for depletion or enrichment of multi-copy genes. Significant enrichment of multi-copy genes was observed in five morning-phased modules while depletion was observed in four evening-phased modules. This dataset shows the results of Biological Process Gene Ontology categorical enrichment for the set of multi-copy genes in these five enriched modules (‘MorningCopied’ tab) and the set of multi-copy genes in these four depleted modules (‘EveningCopied’ tab). [file elife-58993-supp3.xlsx]

## Sheet: EveningCopies
	P-Value	Adj_P-Value	Fold Enrichment	Enrichment Direction	TotalInRef	AnnInRef	TotalInTest	AnnInTest	GenesWithAnn
GO:0065007 - biological regulation	9.92927e-10	2.61338e-06	1.22775	Over	12734	3819	1491	549	BraA01g01380R | BraA01g01670R | BraA01g01920R | BraA01g02340R | BraA01g03000R | BraA01g03110R | BraA01g04250R | BraA01g07380R | BraA01g08210R | BraA01g08330R | BraA01g09430R | BraA01g09990R | BraA01g10230R | BraA01g11750R | BraA01g12360R | BraA01g13210R | BraA01g14290R | BraA01g15600R | BraA01g19530R | BraA01g19740R | BraA01g22590R | BraA01g22670R | BraA01g23310R | BraA01g25220R | BraA01g26210R |…
GO:0050789 - regulation of biological process	5.03601e-09	6.62739e-06	1.22828	Over	12734	3574	1491	514	BraA01g01380R | BraA01g01670R | BraA01g01920R | BraA01g02340R | BraA01g03000R | BraA01g03110R | BraA01g04250R | BraA01g07380R | BraA01g08210R | BraA01g08330R | BraA01g09430R | BraA01g09990R | BraA01g10230R | BraA01g11750R | BraA01g12360R | BraA01g13210R | BraA01g14290R | BraA01g15600R | BraA01g19530R | BraA01g19740R | BraA01g22590R | BraA01g22670R | BraA01g23310R | BraA01g25220R | BraA01g26210R |…
GO:0050794 - regulation of cellular process	1.87159e-08	1.64201e-05	1.236	Over	12734	3220	1491	466	BraA01g01380R | BraA01g01670R | BraA01g01920R | BraA01g02340R | BraA01g03000R | BraA01g03110R | BraA01g04250R | BraA01g07380R | BraA01g08210R | BraA01g09430R | BraA01g09990R | BraA01g10230R | BraA01g11750R | BraA01g12360R | BraA01g14290R | BraA01g15600R | BraA01g19530R | BraA01g19740R | BraA01g22590R | BraA01g22670R | BraA01g23310R | BraA01g25220R | BraA01g26210R | BraA01g28150R | BraA01g28240R |…
GO:0019760 - glucosinolate metabolic process	9.25446e-08	4.05962e-05	2.6794	Over	12734	102	1491	32	BraA01g06640R | BraA01g26210R | BraA02g13430R | BraA02g24780R | BraA02g28690R | BraA03g16090R | BraA03g27380R | BraA03g28400R | BraA03g38340R | BraA03g38550R | BraA03g42560R | BraA03g45360R | BraA03g49910R | BraA03g55110R | BraA04g09410R | BraA04g21180R | BraA05g14010R | BraA05g26150R | BraA05g26670R | BraA07g01210R | BraA07g12270R | BraA07g14390R | BraA08g18080R | BraA08g24580R | BraA08g26740R |…
GO:0016143 - S-glycoside metabolic process	9.25446e-08	4.05962e-05	2.6794	Over	12734	102	1491	32	BraA01g06640R | BraA01g26210R | BraA02g13430R | BraA02g24780R | BraA02g28690R | BraA03g16090R | BraA03g27380R | BraA03g28400R | BraA03g38340R | BraA03g38550R | BraA03g42560R | BraA03g45360R | BraA03g49910R | BraA03g55110R | BraA04g09410R | BraA04g21180R | BraA05g14010R | BraA05g26150R | BraA05g26670R | BraA07g01210R | BraA07g12270R | BraA07g14390R | BraA08g18080R | BraA08g24580R | BraA08g26740R |…
GO:0019757 - glycosinolate metabolic process	9.25446e-08	4.05962e-05	2.6794	Over	12734	102	1491	32	BraA01g06640R | BraA01g26210R | BraA02g13430R | BraA02g24780R | BraA02g28690R | BraA03g16090R | BraA03g27380R | BraA03g28400R | BraA03g38340R | BraA03g38550R | BraA03g42560R | BraA03g45360R | BraA03g49910R | BraA03g55110R | BraA04g09410R | BraA04g21180R | BraA05g14010R | BraA05g26150R | BraA05g26670R | BraA07g01210R | BraA07g12270R | BraA07g14390R | BraA08g18080R | BraA08g24580R | BraA08g26740R |…
GO:0018130 - heterocycle biosynthetic process	2.68078e-07	9.41923e-05	1.29235	Over	12734	2009	1491	304	BraA01g01920R | BraA01g02340R | BraA01g03110R | BraA01g06640R | BraA01g08210R | BraA01g10230R | BraA01g11750R | BraA01g13210R | BraA01g19520R | BraA01g19530R | BraA01g20730R | BraA01g22670R | BraA01g23310R | BraA01g26210R | BraA01g27220R | BraA01g29030R | BraA01g29270R | BraA01g29340R | BraA01g30640R | BraA01g33420R | BraA01g33920R | BraA01g34840R | BraA01g35480R | BraA01g36270R | BraA02g02580R |…
GO:0044271 - cellular nitrogen compound biosynthetic process	3.20147e-07	9.41923e-05	1.29067	Over	12734	2005	1491	303	BraA01g01920R | BraA01g02340R | BraA01g03110R | BraA01g06640R | BraA01g08210R | BraA01g10230R | BraA01g11750R | BraA01g13210R | BraA01g19530R | BraA01g20730R | BraA01g22670R | BraA01g23310R | BraA01g26210R | BraA01g27220R | BraA01g29030R | BraA01g29270R | BraA01g29340R | BraA01g30640R | BraA01g33420R | BraA01g33920R | BraA01g35480R | BraA01g36270R | BraA02g02580R | BraA02g02680R | BraA02g03710R |…
GO:1900055 - regulation of leaf senescence	3.22086e-07	9.41923e-05	4.01909	Over	12734	34	1491	16	BraA01g26210R | BraA03g01760R | BraA03g21290R | BraA03g38340R | BraA03g45070R | BraA03g45080R | BraA04g04660R | BraA04g28050R | BraA05g02770R | BraA05g05980R | BraA05g21420R | BraA05g26670R | BraA07g20790R | BraA08g08540R | BraA09g41630R | BraA09g45260R
GO:0044763 - single-organism cellular process	6.53287e-07	0.000171945	1.14188	Over	12734	5258	1491	703	BraA01g01050R | BraA01g01380R | BraA01g01670R | BraA01g01920R | BraA01g02340R | BraA01g03000R | BraA01g03930R | BraA01g04250R | BraA01g04450R | BraA01g04780R | BraA01g06570R | BraA01g06640R | BraA01g07380R | BraA01g08210R | BraA01g08330R | BraA01g09990R | BraA01g11200R | BraA01g12370R | BraA01g13210R | BraA01g14290R | BraA01g15600R | BraA01g15800R | BraA01g16590R | BraA01g18990R | BraA01g19520R |…
GO:0044767 - single-organism developmental process	7.45907e-07	0.000177997	1.26133	Over	12734	2248	1491	332	BraA01g01380R | BraA01g01670R | BraA01g01920R | BraA01g03000R | BraA01g04250R | BraA01g04450R | BraA01g06640R | BraA01g08210R | BraA01g08330R | BraA01g09990R | BraA01g11750R | BraA01g18990R | BraA01g19740R | BraA01g23600R | BraA01g24860R | BraA01g26210R | BraA01g26420R | BraA01g28240R | BraA01g29030R | BraA01g29340R | BraA01g33360R | BraA01g34840R | BraA02g04000R | BraA02g05200R | BraA02g08780R |…
GO:0000302 - response to reactive oxygen species	8.11538e-07	0.000177997	2.23545	Over	12734	149	1491	39	BraA01g03110R | BraA01g06640R | BraA02g02680R | BraA02g20830R | BraA02g44820R | BraA03g19450R | BraA03g20690R | BraA03g23600R | BraA03g47730R | BraA03g49910R | BraA03g57250R | BraA03g58410R | BraA05g02340R | BraA05g06840R | BraA05g08130R | BraA05g21120R | BraA06g13570R | BraA06g15680R | BraA06g18580R | BraA06g25210R | BraA07g03230R | BraA07g14660R | BraA07g20630R | BraA07g20730R | BraA07g33670R |…
GO:0009653 - anatomical structure morphogenesis	1.05227e-06	0.000213044	1.54299	Over	12734	631	1491	114	BraA01g01380R | BraA01g01670R | BraA01g03000R | BraA01g04450R | BraA01g18990R | BraA01g26420R | BraA01g28240R | BraA01g29030R | BraA01g29340R | BraA01g33360R | BraA01g34840R | BraA02g08780R | BraA02g09040R | BraA02g09700R | BraA02g13560R | BraA02g20430R | BraA02g25240R | BraA02g28310R | BraA02g41750R | BraA02g45330R | BraA03g03070R | BraA03g06330R | BraA03g08930R | BraA03g09800R | BraA03g09870R |…
GO:0016310 - phosphorylation	1.1599e-06	0.000218061	1.43415	Over	12734	929	1491	156	BraA01g01380R | BraA01g01670R | BraA01g03000R | BraA01g04250R | BraA01g07380R | BraA01g11120R | BraA01g33270R | BraA01g36450R | BraA02g01870R | BraA02g08570R | BraA02g09040R | BraA02g09070R | BraA02g13560R | BraA02g19850R | BraA02g20830R | BraA02g21740R | BraA02g24970R | BraA02g26420R | BraA02g30470R | BraA02g32770R | BraA02g35850R | BraA02g36640R | BraA02g38500R | BraA02g39060R | BraA02g40370R |…
GO:0034654 - nucleobase-containing compound biosynthetic process	1.38628e-06	0.000229299	1.29301	Over	12734	1790	1491	271	BraA01g01920R | BraA01g02340R | BraA01g03110R | BraA01g08210R | BraA01g10230R | BraA01g11750R | BraA01g13210R | BraA01g19530R | BraA01g20730R | BraA01g22670R | BraA01g23310R | BraA01g26210R | BraA01g29030R | BraA01g29270R | BraA01g29340R | BraA01g30640R | BraA01g33920R | BraA01g35480R | BraA01g36270R | BraA02g02580R | BraA02g02680R | BraA02g04000R | BraA02g04820R | BraA02g05500R | BraA02g06080R |…
GO:0019438 - aromatic compound biosynthetic process	1.47763e-06	0.000229299	1.26977	Over	12734	2038	1491	303	BraA01g01920R | BraA01g02340R | BraA01g03110R | BraA01g06640R | BraA01g08210R | BraA01g10230R | BraA01g11750R | BraA01g13210R | BraA01g19520R | BraA01g19530R | BraA01g20730R | BraA01g22670R | BraA01g23310R | BraA01g26210R | BraA01g29030R | BraA01g29270R | BraA01g29340R | BraA01g30640R | BraA01g33270R | BraA01g33420R | BraA01g33920R | BraA01g35480R | BraA01g36270R | BraA02g01870R | BraA02g02580R |…
GO:1901362 - organic cyclic compound biosynthetic process	1.48104e-06	0.000229299	1.26172	Over	12734	2139	1491	316	BraA01g01920R | BraA01g02340R | BraA01g03110R | BraA01g06640R | BraA01g08210R | BraA01g10230R | BraA01g11750R | BraA01g13210R | BraA01g19520R | BraA01g19530R | BraA01g20730R | BraA01g22670R | BraA01g23310R | BraA01g26210R | BraA01g27220R | BraA01g29030R | BraA01g29270R | BraA01g29340R | BraA01g30640R | BraA01g33270R | BraA01g33420R | BraA01g33920R | BraA01g34840R | BraA01g35480R | BraA01g36270R |…
GO:0032502 - developmental process	1.61826e-06	0.000236625	1.24867	Over	12734	2305	1491	337	BraA01g01380R | BraA01g01670R | BraA01g01920R | BraA01g03000R | BraA01g04250R | BraA01g04450R | BraA01g06640R | BraA01g08210R | BraA01g08330R | BraA01g09990R | BraA01g11750R | BraA01g18990R | BraA01g19740R | BraA01g23600R | BraA01g24860R | BraA01g26210R | BraA01g26420R | BraA01g28240R | BraA01g29030R | BraA01g29340R | BraA01g33360R | BraA01g34840R | BraA02g04000R | BraA02g05200R | BraA02g08780R |…
GO:0044699 - single-organism process	1.78751e-06	0.000247618	1.10483	Over	12734	6849	1491	886	BraA01g01050R | BraA01g01380R | BraA01g01670R | BraA01g01920R | BraA01g02340R | BraA01g03000R | BraA01g03930R | BraA01g04250R | BraA01g04450R | BraA01g04780R | BraA01g06570R | BraA01g06640R | BraA01g07380R | BraA01g08210R | BraA01g08330R | BraA01g08580R | BraA01g09990R | BraA01g11200R | BraA01g11750R | BraA01g12360R | BraA01g12370R | BraA01g13210R | BraA01g14260R | BraA01g14290R | BraA01g15600R |…
GO:0016192 - vesicle-mediated transport	2.51878e-06	0.000315423	1.73835	Over	12734	339	1491	69	BraA01g01050R | BraA01g01380R | BraA01g01670R | BraA01g12360R | BraA01g14290R | BraA01g26740R | BraA01g30710R | BraA02g06210R | BraA02g13560R | BraA02g21210R | BraA02g24900R | BraA02g35780R | BraA02g37510R | BraA03g02780R | BraA03g06000R | BraA03g06330R | BraA03g08090R | BraA03g12630R | BraA03g22900R | BraA03g24360R | BraA03g34510R | BraA03g38650R | BraA03g53540R | BraA03g53750R | BraA03g53990R |…
GO:0048513 - organ development	2.56926e-06	0.000315423	1.466	Over	12734	769	1491	132	BraA01g03000R | BraA01g04250R | BraA01g11750R | BraA01g26210R | BraA01g26420R | BraA01g29030R | BraA01g29340R | BraA01g33360R | BraA02g09040R | BraA02g17810R | BraA02g20430R | BraA02g22900R | BraA02g25240R | BraA02g28120R | BraA02g28310R | BraA02g31930R | BraA02g41750R | BraA02g43470R | BraA02g44170R | BraA02g44200R | BraA02g45330R | BraA03g01510R | BraA03g01760R | BraA03g03070R | BraA03g05520R |…
GO:0046483 - heterocycle metabolic process	2.63652e-06	0.000315423	1.20994	Over	12734	2887	1491	409	BraA01g01920R | BraA01g02340R | BraA01g03110R | BraA01g06640R | BraA01g08210R | BraA01g10230R | BraA01g11200R | BraA01g11750R | BraA01g13210R | BraA01g19520R | BraA01g19530R | BraA01g20730R | BraA01g22670R | BraA01g23310R | BraA01g26210R | BraA01g27220R | BraA01g28150R | BraA01g29030R | BraA01g29270R | BraA01g29340R | BraA01g30640R | BraA01g31590R | BraA01g33420R | BraA01g33690R | BraA01g33920R |…
GO:0031326 - regulation of cellular biosynthetic process	3.28459e-06	0.000375872	1.28802	Over	12734	1724	1491	260	BraA01g01920R | BraA01g02340R | BraA01g03110R | BraA01g08210R | BraA01g09430R | BraA01g10230R | BraA01g11750R | BraA01g19530R | BraA01g22670R | BraA01g23310R | BraA01g26210R | BraA01g29030R | BraA01g29270R | BraA01g29340R | BraA01g30640R | BraA01g33270R | BraA01g33920R | BraA01g35480R | BraA01g35590R | BraA01g36270R | BraA02g01870R | BraA02g02580R | BraA02g02680R | BraA02g04000R | BraA02g04820R |…
GO:0016055 - Wnt signaling pathway	4.1315e-06	0.000407422	6.21133	Over	12734	11	1491	8	BraA01g01380R | BraA01g01670R | BraA02g13560R | BraA03g12630R | BraA03g53540R | BraA03g53750R | BraA09g64150R | BraA10g03590R
GO:0016144 - S-glycoside biosynthetic process	4.17948e-06	0.000407422	3.06172	Over	12734	53	1491	19	BraA01g06640R | BraA02g13430R | BraA02g28690R | BraA03g27380R | BraA03g28400R | BraA03g38550R | BraA03g42560R | BraA03g45360R | BraA03g49910R | BraA04g09410R | BraA05g26150R | BraA07g01210R | BraA08g34010R | BraA09g02990R | BraA09g10830R | BraA09g12830R | BraA09g26230R | BraA10g03880R | BraA10g14510R
GO:0019758 - glycosinolate biosynthetic process	4.17948e-06	0.000407422	3.06172	Over	12734	53	1491	19	BraA01g06640R | BraA02g13430R | BraA02g28690R | BraA03g27380R | BraA03g28400R | BraA03g38550R | BraA03g42560R | BraA03g45360R | BraA03g49910R | BraA04g09410R | BraA05g26150R | BraA07g01210R | BraA08g34010R | BraA09g02990R | BraA09g10830R | BraA09g12830R | BraA09g26230R | BraA10g03880R | BraA10g14510R
GO:0019761 - glucosinolate biosynthetic process	4.17948e-06	0.000407422	3.06172	Over	12734	53	1491	19	BraA01g06640R | BraA02g13430R | BraA02g28690R | BraA03g27380R | BraA03g28400R | BraA03g38550R | BraA03g42560R | BraA03g45360R | BraA03g49910R | BraA04g09410R | BraA05g26150R | BraA07g01210R | BraA08g34010R | BraA09g02990R | BraA09g10830R | BraA09g12830R | BraA09g26230R | BraA10g03880R | BraA10g14510R
GO:0009889 - regulation of biosynthetic process	5.04544e-06	0.000474272	1.28035	Over	12734	1741	1491	261	BraA01g01920R | BraA01g02340R | BraA01g03110R | BraA01g08210R | BraA01g09430R | BraA01g10230R | BraA01g11750R | BraA01g19530R | BraA01g22670R | BraA01g23310R | BraA01g26210R | BraA01g29030R | BraA01g29270R | BraA01g29340R | BraA01g30640R | BraA01g33270R | BraA01g33920R | BraA01g35480R | BraA01g35590R | BraA01g36270R | BraA02g01870R | BraA02g02580R | BraA02g02680R | BraA02g04000R | BraA02g04820R |…
GO:1901137 - carbohydrate derivative biosynthetic process	5.25959e-06	0.000477353	1.7348	Over	12734	320	1491	65	BraA01g04780R | BraA01g06640R | BraA02g12360R | BraA02g13430R | BraA02g20150R | BraA02g28690R | BraA02g38500R | BraA03g05950R | BraA03g09440R | BraA03g18870R | BraA03g20690R | BraA03g24320R | BraA03g24520R | BraA03g27380R | BraA03g28400R | BraA03g38550R | BraA03g40270R | BraA03g42560R | BraA03g45360R | BraA03g48630R | BraA03g49910R | BraA04g09410R | BraA04g19830R | BraA04g24470R | BraA04g26400R |…
GO:0018105 - peptidyl-serine phosphorylation	6.68655e-06	0.000586634	2.80238	Over	12734	64	1491	21	BraA01g01380R | BraA01g01670R | BraA01g07380R | BraA02g09070R | BraA02g13560R | BraA03g12630R | BraA03g16200R | BraA03g44880R | BraA03g50390R | BraA03g53540R | BraA03g53750R | BraA04g08310R | BraA04g21350R | BraA06g09110R | BraA08g13320R | BraA09g60230R | BraA09g64150R | BraA09g65140R | BraA10g01690R | BraA10g03590R | BraA10g19590R
GO:0018193 - peptidyl-amino acid modification	1.13904e-05	0.000945621	1.88454	Over	12734	213	1491	47	BraA01g01380R | BraA01g01670R | BraA01g07380R | BraA02g03710R | BraA02g09070R | BraA02g13560R | BraA03g05520R | BraA03g09440R | BraA03g12630R | BraA03g16200R | BraA03g44880R | BraA03g45070R | BraA03g45080R | BraA03g50390R | BraA03g53540R | BraA03g53750R | BraA03g54740R | BraA03g55660R | BraA04g08310R | BraA04g21350R | BraA05g40040R | BraA06g06920R | BraA06g09110R | BraA06g15380R | BraA06g28490R |…
GO:0018209 - peptidyl-serine modification	1.14969e-05	0.000945621	2.71746	Over	12734	66	1491	21	BraA01g01380R | BraA01g01670R | BraA01g07380R | BraA02g09070R | BraA02g13560R | BraA03g12630R | BraA03g16200R | BraA03g44880R | BraA03g50390R | BraA03g53540R | BraA03g53750R | BraA04g08310R | BraA04g21350R | BraA06g09110R | BraA08g13320R | BraA09g60230R | BraA09g64150R | BraA09g65140R | BraA10g01690R | BraA10g03590R | BraA10g19590R
GO:0043436 - oxoacid metabolic process	1.44285e-05	0.00115078	1.37354	Over	12734	970	1491	156	BraA01g06640R | BraA01g08330R | BraA01g15800R | BraA01g16590R | BraA01g19520R | BraA01g23600R | BraA01g26210R | BraA01g27220R | BraA01g33270R | BraA01g33420R | BraA02g01870R | BraA02g05140R | BraA02g05650R | BraA02g05790R | BraA02g13430R | BraA02g14580R | BraA02g15890R | BraA02g15900R | BraA02g16820R | BraA02g17640R | BraA02g20150R | BraA02g22900R | BraA02g23480R | BraA02g24780R | BraA02g28690R |…
GO:0006082 - organic acid metabolic process	1.52763e-05	0.00118256	1.37212	Over	12734	971	1491	156	BraA01g06640R | BraA01g08330R | BraA01g15800R | BraA01g16590R | BraA01g19520R | BraA01g23600R | BraA01g26210R | BraA01g27220R | BraA01g33270R | BraA01g33420R | BraA02g01870R | BraA02g05140R | BraA02g05650R | BraA02g05790R | BraA02g13430R | BraA02g14580R | BraA02g15890R | BraA02g15900R | BraA02g16820R | BraA02g17640R | BraA02g20150R | BraA02g22900R | BraA02g23480R | BraA02g24780R | BraA02g28690R |…
GO:0048856 - anatomical structure development	1.84072e-05	0.00126445	1.24918	Over	12734	1887	1491	276	BraA01g01380R | BraA01g01670R | BraA01g03000R | BraA01g04250R | BraA01g04450R | BraA01g06640R | BraA01g08330R | BraA01g11750R | BraA01g18990R | BraA01g23600R | BraA01g26210R | BraA01g26420R | BraA01g28240R | BraA01g29030R | BraA01g29340R | BraA01g33360R | BraA01g34840R | BraA02g08780R | BraA02g09040R | BraA02g09700R | BraA02g10090R | BraA02g13560R | BraA02g13720R | BraA02g15890R | BraA02g15900R |…
GO:0006355 - regulation of transcription, DNA-templated	1.90247e-05	0.00126445	1.27863	Over	12734	1563	1491	234	BraA01g01920R | BraA01g02340R | BraA01g03110R | BraA01g08210R | BraA01g10230R | BraA01g11750R | BraA01g19530R | BraA01g22670R | BraA01g23310R | BraA01g26210R | BraA01g29030R | BraA01g29270R | BraA01g29340R | BraA01g30640R | BraA01g33920R | BraA01g35480R | BraA01g36270R | BraA02g02580R | BraA02g02680R | BraA02g04000R | BraA02g04820R | BraA02g05500R | BraA02g06080R | BraA02g06090R | BraA02g06780R |…
GO:1901135 - carbohydrate derivative metabolic process	1.90393e-05	0.00126445	1.49914	Over	12734	564	1491	99	BraA01g03900R | BraA01g04780R | BraA01g06640R | BraA01g26210R | BraA01g33950R | BraA02g05140R | BraA02g12360R | BraA02g13430R | BraA02g20150R | BraA02g24550R | BraA02g24780R | BraA02g28120R | BraA02g28690R | BraA02g35840R | BraA02g38500R | BraA03g05560R | BraA03g05950R | BraA03g09440R | BraA03g16090R | BraA03g18870R | BraA03g20690R | BraA03g24320R | BraA03g24520R | BraA03g27380R | BraA03g28400R |…
GO:0006351 - transcription, DNA-templated	1.94505e-05	0.00126445	1.27189	Over	12734	1625	1491	242	BraA01g01920R | BraA01g02340R | BraA01g03110R | BraA01g08210R | BraA01g10230R | BraA01g11750R | BraA01g13210R | BraA01g19530R | BraA01g20730R | BraA01g22670R | BraA01g23310R | BraA01g26210R | BraA01g29030R | BraA01g29270R | BraA01g29340R | BraA01g30640R | BraA01g33920R | BraA01g35480R | BraA01g36270R | BraA02g02580R | BraA02g02680R | BraA02g04000R | BraA02g04820R | BraA02g05500R | BraA02g06080R |…
GO:1901657 - glycosyl compound metabolic process	1.95499e-05	0.00126445	1.72597	Over	12734	287	1491	58	BraA01g06640R | BraA01g26210R | BraA01g33950R | BraA02g13430R | BraA02g20150R | BraA02g24550R | BraA02g24780R | BraA02g28120R | BraA02g28690R | BraA02g35840R | BraA02g38500R | BraA03g16090R | BraA03g18870R | BraA03g24320R | BraA03g24520R | BraA03g27380R | BraA03g28400R | BraA03g38340R | BraA03g38550R | BraA03g42560R | BraA03g45360R | BraA03g49910R | BraA03g55110R | BraA04g09410R | BraA04g19830R |…
GO:1903506 - regulation of nucleic acid-templated transcription	1.9894e-05	0.00126445	1.27781	Over	12734	1564	1491	234	BraA01g01920R | BraA01g02340R | BraA01g03110R | BraA01g08210R | BraA01g10230R | BraA01g11750R | BraA01g19530R | BraA01g22670R | BraA01g23310R | BraA01g26210R | BraA01g29030R | BraA01g29270R | BraA01g29340R | BraA01g30640R | BraA01g33920R | BraA01g35480R | BraA01g36270R | BraA02g02580R | BraA02g02680R | BraA02g04000R | BraA02g04820R | BraA02g05500R | BraA02g06080R | BraA02g06090R | BraA02g06780R |…
GO:2001141 - regulation of RNA biosynthetic process	1.9894e-05	0.00126445	1.27781	Over	12734	1564	1491	234	BraA01g01920R | BraA01g02340R | BraA01g03110R | BraA01g08210R | BraA01g10230R | BraA01g11750R | BraA01g19530R | BraA01g22670R | BraA01g23310R | BraA01g26210R | BraA01g29030R | BraA01g29270R | BraA01g29340R | BraA01g30640R | BraA01g33920R | BraA01g35480R | BraA01g36270R | BraA02g02580R | BraA02g02680R | BraA02g04000R | BraA02g04820R | BraA02g05500R | BraA02g06080R | BraA02g06090R | BraA02g06780R |…
GO:0097659 - nucleic acid-templated transcription	2.0322e-05	0.00126445	1.27111	Over	12734	1626	1491	242	BraA01g01920R | BraA01g02340R | BraA01g03110R | BraA01g08210R | BraA01g10230R | BraA01g11750R | BraA01g13210R | BraA01g19530R | BraA01g20730R | BraA01g22670R | BraA01g23310R | BraA01g26210R | BraA01g29030R | BraA01g29270R | BraA01g29340R | BraA01g30640R | BraA01g33920R | BraA01g35480R | BraA01g36270R | BraA02g02580R | BraA02g02680R | BraA02g04000R | BraA02g04820R | BraA02g05500R | BraA02g06080R |…
GO:0031323 - regulation of cellular metabolic process	2.06578e-05	0.00126445	1.24485	Over	12734	1921	1491	280	BraA01g01920R | BraA01g02340R | BraA01g03110R | BraA01g08210R | BraA01g09430R | BraA01g10230R | BraA01g11750R | BraA01g14290R | BraA01g15600R | BraA01g19530R | BraA01g22670R | BraA01g23310R | BraA01g26210R | BraA01g28150R | BraA01g29030R | BraA01g29270R | BraA01g29340R | BraA01g30640R | BraA01g33270R | BraA01g33920R | BraA01g35480R | BraA01g35590R | BraA01g36270R | BraA02g01870R | BraA02g02580R |…
GO:0019222 - regulation of metabolic process	2.16854e-05	0.00128649	1.22988	Over	12734	2118	1491	305	BraA01g01920R | BraA01g02340R | BraA01g03110R | BraA01g08210R | BraA01g09430R | BraA01g10230R | BraA01g11750R | BraA01g13210R | BraA01g14290R | BraA01g15600R | BraA01g19530R | BraA01g22670R | BraA01g23310R | BraA01g26210R | BraA01g28150R | BraA01g29030R | BraA01g29270R | BraA01g29340R | BraA01g30640R | BraA01g33270R | BraA01g33920R | BraA01g35480R | BraA01g35590R | BraA01g36270R | BraA02g01870R |…
GO:0032774 - RNA biosynthetic process	2.21761e-05	0.00128649	1.26955	Over	12734	1628	1491	242	BraA01g01920R | BraA01g02340R | BraA01g03110R | BraA01g08210R | BraA01g10230R | BraA01g11750R | BraA01g13210R | BraA01g19530R | BraA01g20730R | BraA01g22670R | BraA01g23310R | BraA01g26210R | BraA01g29030R | BraA01g29270R | BraA01g29340R | BraA01g30640R | BraA01g33920R | BraA01g35480R | BraA01g36270R | BraA02g02580R | BraA02g02680R | BraA02g04000R | BraA02g04820R | BraA02g05500R | BraA02g06080R |…
GO:0010468 - regulation of gene expression	2.24842e-05	0.00128649	1.25498	Over	12734	1783	1491	262	BraA01g01920R | BraA01g02340R | BraA01g03110R | BraA01g08210R | BraA01g09430R | BraA01g10230R | BraA01g11750R | BraA01g13210R | BraA01g19530R | BraA01g22670R | BraA01g23310R | BraA01g26210R | BraA01g29030R | BraA01g29270R | BraA01g29340R | BraA01g30640R | BraA01g33920R | BraA01g35480R | BraA01g35590R | BraA01g36270R | BraA02g02580R | BraA02g02680R | BraA02g04000R | BraA02g04820R | BraA02g05500R |…
GO:0019219 - regulation of nucleobase-containing compound metabolic process	2.35805e-05	0.00132051	1.26997	Over	12734	1614	1491	240	BraA01g01920R | BraA01g02340R | BraA01g03110R | BraA01g08210R | BraA01g10230R | BraA01g11750R | BraA01g19530R | BraA01g22670R | BraA01g23310R | BraA01g26210R | BraA01g28150R | BraA01g29030R | BraA01g29270R | BraA01g29340R | BraA01g30640R | BraA01g33920R | BraA01g35480R | BraA01g36270R | BraA02g02580R | BraA02g02680R | BraA02g04000R | BraA02g04820R | BraA02g05500R | BraA02g06080R | BraA02g06090R |…
GO:0006796 - phosphate-containing compound metabolic process	2.43151e-05	0.00132081	1.29039	Over	12734	1423	1491	215	BraA01g01380R | BraA01g01670R | BraA01g03000R | BraA01g03930R | BraA01g04250R | BraA01g07380R | BraA01g11120R | BraA01g26140R | BraA01g31580R | BraA01g33270R | BraA01g33420R | BraA01g36450R | BraA02g01870R | BraA02g05140R | BraA02g08570R | BraA02g09040R | BraA02g09070R | BraA02g10020R | BraA02g13560R | BraA02g17640R | BraA02g18840R | BraA02g19850R | BraA02g20150R | BraA02g20830R | BraA02g21740R |…
GO:2000024 - regulation of leaf development	2.45896e-05	0.00132081	2.75036	Over	12734	59	1491	19	BraA01g26210R | BraA03g01760R | BraA03g21290R | BraA03g38340R | BraA03g45070R | BraA03g45080R | BraA04g04660R | BraA04g28050R | BraA04g28940R | BraA05g02770R | BraA05g03590R | BraA05g05980R | BraA05g21420R | BraA05g26670R | BraA07g20790R | BraA08g08540R | BraA08g34230R | BraA09g41630R | BraA09g45260R
GO:0006807 - nitrogen compound metabolic process	2.56492e-05	0.00135017	1.17203	Over	12734	3250	1491	446	BraA01g01920R | BraA01g02340R | BraA01g03110R | BraA01g03900R | BraA01g06640R | BraA01g08210R | BraA01g10230R | BraA01g11200R | BraA01g11750R | BraA01g13210R | BraA01g15800R | BraA01g16590R | BraA01g19520R | BraA01g19530R | BraA01g20730R | BraA01g22670R | BraA01g23310R | BraA01g26210R | BraA01g27220R | BraA01g28150R | BraA01g29030R | BraA01g29270R | BraA01g29340R | BraA01g30640R | BraA01g31590R |…
GO:2000112 - regulation of cellular macromolecule biosynthetic process	2.66944e-05	0.00137764	1.26546	Over	12734	1640	1491	243	BraA01g01920R | BraA01g02340R | BraA01g03110R | BraA01g08210R | BraA01g09430R | BraA01g10230R | BraA01g11750R | BraA01g19530R | BraA01g22670R | BraA01g23310R | BraA01g26210R | BraA01g29030R | BraA01g29270R | BraA01g29340R | BraA01g30640R | BraA01g33920R | BraA01g35480R | BraA01g35590R | BraA01g36270R | BraA02g02580R | BraA02g02680R | BraA02g04000R | BraA02g04820R | BraA02g05500R | BraA02g06080R |…
GO:0006793 - phosphorus metabolic process	2.75538e-05	0.00139464	1.28612	Over	12734	1441	1491	217	BraA01g01380R | BraA01g01670R | BraA01g03000R | BraA01g03930R | BraA01g04250R | BraA01g07380R | BraA01g11120R | BraA01g26140R | BraA01g31580R | BraA01g33270R | BraA01g33420R | BraA01g36450R | BraA02g01870R | BraA02g05140R | BraA02g08570R | BraA02g09040R | BraA02g09070R | BraA02g10020R | BraA02g13560R | BraA02g14580R | BraA02g16820R | BraA02g17640R | BraA02g18840R | BraA02g19850R | BraA02g20150R |…
GO:0010556 - regulation of macromolecule biosynthetic process	3.03506e-05	0.00150722	1.26315	Over	12734	1643	1491	243	BraA01g01920R | BraA01g02340R | BraA01g03110R | BraA01g08210R | BraA01g09430R | BraA01g10230R | BraA01g11750R | BraA01g19530R | BraA01g22670R | BraA01g23310R | BraA01g26210R | BraA01g29030R | BraA01g29270R | BraA01g29340R | BraA01g30640R | BraA01g33920R | BraA01g35480R | BraA01g35590R | BraA01g36270R | BraA02g02580R | BraA02g02680R | BraA02g04000R | BraA02g04820R | BraA02g05500R | BraA02g06080R |…
GO:1901700 - response to oxygen-containing compound	3.45675e-05	0.00168484	1.29175	Over	12734	1362	1491	206	BraA01g03000R | BraA01g03110R | BraA01g03900R | BraA01g06640R | BraA01g07380R | BraA01g09950R | BraA01g10230R | BraA01g26210R | BraA01g29030R | BraA01g29270R | BraA01g34840R | BraA02g02680R | BraA02g05790R | BraA02g06390R | BraA02g09070R | BraA02g09880R | BraA02g13720R | BraA02g15700R | BraA02g15770R | BraA02g20430R | BraA02g20710R | BraA02g20830R | BraA02g28700R | BraA02g38060R | BraA02g41770R |…
GO:0006412 - translation	3.85024e-05	0.00184251	0.520532	Under	12734	443	1491	27	BraA01g09430R | BraA01g11200R | BraA01g27430R | BraA01g35590R | BraA02g02580R | BraA02g10090R | BraA03g05860R | BraA03g18030R | BraA03g30710R | BraA03g34270R | BraA03g34460R | BraA03g41120R | BraA03g51860R | BraA05g28560R | BraA06g05490R | BraA06g23420R | BraA06g39920R | BraA07g11050R | BraA07g16630R | BraA07g18540R | BraA07g23500R | BraA08g24950R | BraA09g06760R | BraA09g09060R | BraA09g49710R |…
GO:0051252 - regulation of RNA metabolic process	4.54546e-05	0.00213637	1.26247	Over	12734	1583	1491	234	BraA01g01920R | BraA01g02340R | BraA01g03110R | BraA01g08210R | BraA01g10230R | BraA01g11750R | BraA01g19530R | BraA01g22670R | BraA01g23310R | BraA01g26210R | BraA01g29030R | BraA01g29270R | BraA01g29340R | BraA01g30640R | BraA01g33920R | BraA01g35480R | BraA01g36270R | BraA02g02580R | BraA02g02680R | BraA02g04000R | BraA02g04820R | BraA02g05500R | BraA02g06080R | BraA02g06090R | BraA02g06780R |…
GO:0021700 - developmental maturation	5.41105e-05	0.00248512	2.19615	Over	12734	105	1491	27	BraA01g03000R | BraA02g28310R | BraA02g43470R | BraA02g45330R | BraA03g09870R | BraA03g13820R | BraA03g29610R | BraA03g30320R | BraA03g38040R | BraA03g47590R | BraA04g01910R | BraA04g24470R | BraA05g09870R | BraA05g27210R | BraA05g40040R | BraA06g25910R | BraA06g28490R | BraA07g03730R | BraA07g23830R | BraA07g33970R | BraA08g13350R | BraA08g18250R | BraA08g27510R | BraA08g27520R | BraA09g01470R |…
GO:0046903 - secretion	5.55173e-05	0.00248512	2.27143	Over	12734	94	1491	25	BraA01g14290R | BraA02g06210R | BraA02g09660R | BraA02g24900R | BraA02g44090R | BraA03g06000R | BraA03g22900R | BraA03g34510R | BraA04g06350R | BraA04g06860R | BraA04g30380R | BraA05g05200R | BraA05g33430R | BraA06g09370R | BraA06g22310R | BraA06g23760R | BraA06g34270R | BraA07g19880R | BraA07g20140R | BraA07g25410R | BraA07g27870R | BraA08g11180R | BraA09g42870R | BraA09g43400R | BraA09g60410R
GO:0034641 - cellular nitrogen compound metabolic process	5.57076e-05	0.00248512	1.1766	Over	12734	2918	1491	402	BraA01g01920R | BraA01g02340R | BraA01g03110R | BraA01g06640R | BraA01g08210R | BraA01g10230R | BraA01g11200R | BraA01g11750R | BraA01g13210R | BraA01g19520R | BraA01g19530R | BraA01g20730R | BraA01g22670R | BraA01g23310R | BraA01g26210R | BraA01g27220R | BraA01g28150R | BraA01g29030R | BraA01g29270R | BraA01g29340R | BraA01g30640R | BraA01g31590R | BraA01g33420R | BraA01g33690R | BraA01g33920R |…
GO:0032940 - secretion by cell	6.10603e-05	0.00267851	2.30308	Over	12734	89	1491	24	BraA01g14290R | BraA02g06210R | BraA02g24900R | BraA02g44090R | BraA03g06000R | BraA03g22900R | BraA03g34510R | BraA04g06350R | BraA04g06860R | BraA04g30380R | BraA05g05200R | BraA05g33430R | BraA06g09370R | BraA06g22310R | BraA06g23760R | BraA06g34270R | BraA07g19880R | BraA07g20140R | BraA07g25410R | BraA07g27870R | BraA08g11180R | BraA09g42870R | BraA09g43400R | BraA09g60410R
GO:0044281 - small molecule metabolic process	6.23428e-05	0.00268994	1.27417	Over	12734	1421	1491	212	BraA01g06640R | BraA01g08330R | BraA01g15800R | BraA01g16590R | BraA01g19520R | BraA01g23600R | BraA01g26210R | BraA01g27220R | BraA01g33270R | BraA01g33420R | BraA02g01870R | BraA02g05140R | BraA02g05650R | BraA02g05790R | BraA02g06020R | BraA02g07930R | BraA02g12360R | BraA02g13430R | BraA02g14580R | BraA02g15890R | BraA02g15900R | BraA02g16820R | BraA02g17640R | BraA02g20150R | BraA02g21740R |…
GO:1901659 - glycosyl compound biosynthetic process	6.56559e-05	0.0027872	2.02443	Over	12734	135	1491	32	BraA01g06640R | BraA02g13430R | BraA02g20150R | BraA02g28690R | BraA02g38500R | BraA03g18870R | BraA03g24320R | BraA03g24520R | BraA03g27380R | BraA03g28400R | BraA03g38550R | BraA03g42560R | BraA03g45360R | BraA03g49910R | BraA04g09410R | BraA04g19830R | BraA05g07990R | BraA05g26150R | BraA06g35940R | BraA07g01210R | BraA07g03180R | BraA07g16850R | BraA07g32890R | BraA08g34010R | BraA09g02990R |…
GO:0060255 - regulation of macromolecule metabolic process	6.87596e-05	0.00287262	1.22977	Over	12734	1889	1491	272	BraA01g01920R | BraA01g02340R | BraA01g03110R | BraA01g08210R | BraA01g09430R | BraA01g10230R | BraA01g11750R | BraA01g13210R | BraA01g15600R | BraA01g19530R | BraA01g22670R | BraA01g23310R | BraA01g26210R | BraA01g28150R | BraA01g29030R | BraA01g29270R | BraA01g29340R | BraA01g30640R | BraA01g33920R | BraA01g35480R | BraA01g35590R | BraA01g36270R | BraA02g02580R | BraA02g02680R | BraA02g04000R |…
GO:0009690 - cytokinin metabolic process	7.3027e-05	0.00300324	4.27029	Over	12734	18	1491	9	BraA02g02980R | BraA02g05280R | BraA02g06390R | BraA02g09510R | BraA02g10350R | BraA03g06930R | BraA03g09610R | BraA10g23290R | BraA10g28600R
GO:0048869 - cellular developmental process	7.51223e-05	0.00304086	1.42126	Over	12734	655	1491	109	BraA01g01380R | BraA01g01670R | BraA01g01920R | BraA01g03000R | BraA01g04250R | BraA01g04450R | BraA01g08210R | BraA01g18990R | BraA01g24860R | BraA01g28240R | BraA01g29340R | BraA02g05200R | BraA02g08780R | BraA02g09700R | BraA02g13560R | BraA02g13720R | BraA02g28310R | BraA02g35140R | BraA02g39150R | BraA02g40380R | BraA02g43470R | BraA02g45330R | BraA03g02540R | BraA03g08930R | BraA03g09800R |…
GO:0015979 - photosynthesis	7.63404e-05	0.00304086	0.414282	Under	12734	268	1491	13	BraA01g11120R | BraA02g28120R | BraA02g38060R | BraA03g12620R | BraA03g45430R | BraA04g05020R | BraA05g06070R | BraA06g14080R | BraA07g20630R | BraA09g44980R | BraA09g48450R | BraA09g49850R | BraA10g14290R
GO:0051171 - regulation of nitrogen compound metabolic process	7.85251e-05	0.00304086	1.24571	Over	12734	1666	1491	243	BraA01g01920R | BraA01g02340R | BraA01g03110R | BraA01g08210R | BraA01g10230R | BraA01g11750R | BraA01g19530R | BraA01g22670R | BraA01g23310R | BraA01g26210R | BraA01g28150R | BraA01g29030R | BraA01g29270R | BraA01g29340R | BraA01g30640R | BraA01g33920R | BraA01g35480R | BraA01g36270R | BraA02g02580R | BraA02g02680R | BraA02g04000R | BraA02g04820R | BraA02g05500R | BraA02g06080R | BraA02g06090R |…
GO:0080090 - regulation of primary metabolic process	7.85633e-05	0.00304086	1.23281	Over	12734	1822	1491	263	BraA01g01920R | BraA01g02340R | BraA01g03110R | BraA01g08210R | BraA01g09430R | BraA01g10230R | BraA01g11750R | BraA01g15600R | BraA01g19530R | BraA01g22670R | BraA01g23310R | BraA01g26210R | BraA01g28150R | BraA01g29030R | BraA01g29270R | BraA01g29340R | BraA01g30640R | BraA01g33920R | BraA01g35480R | BraA01g35590R | BraA01g36270R | BraA02g02580R | BraA02g02680R | BraA02g04000R | BraA02g04820R |…
GO:0048765 - root hair cell differentiation	8.88772e-05	0.00329472	2.34866	Over	12734	80	1491	22	BraA01g03000R | BraA02g28310R | BraA02g45330R | BraA03g09870R | BraA03g29610R | BraA03g38040R | BraA03g47590R | BraA04g01910R | BraA04g24470R | BraA05g09870R | BraA05g27210R | BraA05g40040R | BraA06g25910R | BraA06g28490R | BraA07g03730R | BraA07g33970R | BraA08g13350R | BraA08g18250R | BraA08g27510R | BraA08g27520R | BraA09g01470R | BraA09g49030R
GO:0048469 - cell maturation	8.88772e-05	0.00329472	2.34866	Over	12734	80	1491	22	BraA01g03000R | BraA02g28310R | BraA02g45330R | BraA03g09870R | BraA03g29610R | BraA03g38040R | BraA03g47590R | BraA04g01910R | BraA04g24470R | BraA05g09870R | BraA05g27210R | BraA05g40040R | BraA06g25910R | BraA06g28490R | BraA07g03730R | BraA07g33970R | BraA08g13350R | BraA08g18250R | BraA08g27510R | BraA08g27520R | BraA09g01470R | BraA09g49030R
GO:0048764 - trichoblast maturation	8.88772e-05	0.00329472	2.34866	Over	12734	80	1491	22	BraA01g03000R | BraA02g28310R | BraA02g45330R | BraA03g09870R | BraA03g29610R | BraA03g38040R | BraA03g47590R | BraA04g01910R | BraA04g24470R | BraA05g09870R | BraA05g27210R | BraA05g40040R | BraA06g25910R | BraA06g28490R | BraA07g03730R | BraA07g33970R | BraA08g13350R | BraA08g18250R | BraA08g27510R | BraA08g27520R | BraA09g01470R | BraA09g49030R
GO:0006725 - cellular aromatic compound metabolic process	9.46857e-05	0.00346129	1.16895	Over	12734	2959	1491	405	BraA01g01920R | BraA01g02340R | BraA01g03110R | BraA01g06640R | BraA01g08210R | BraA01g10230R | BraA01g11200R | BraA01g11750R | BraA01g13210R | BraA01g19520R | BraA01g19530R | BraA01g20730R | BraA01g22670R | BraA01g23310R | BraA01g26210R | BraA01g27220R | BraA01g28150R | BraA01g29030R | BraA01g29270R | BraA01g29340R | BraA01g30640R | BraA01g31590R | BraA01g33270R | BraA01g33420R | BraA01g33690R |…
GO:0042254 - ribosome biogenesis	9.74924e-05	0.00350697	0.376237	Under	12734	227	1491	10	BraA02g31630R | BraA02g43810R | BraA03g07420R | BraA03g23080R | BraA05g18870R | BraA05g18970R | BraA06g15240R | BraA08g29210R | BraA09g09060R | BraA10g22510R
GO:0044237 - cellular metabolic process	9.86002e-05	0.00350697	1.08903	Over	12734	6517	1491	831	BraA01g01380R | BraA01g01670R | BraA01g01920R | BraA01g02340R | BraA01g03000R | BraA01g03110R | BraA01g03930R | BraA01g04250R | BraA01g04780R | BraA01g06640R | BraA01g07380R | BraA01g08210R | BraA01g08330R | BraA01g09430R | BraA01g09990R | BraA01g10230R | BraA01g11120R | BraA01g11200R | BraA01g11750R | BraA01g12370R | BraA01g13210R | BraA01g14290R | BraA01g15600R | BraA01g15800R | BraA01g16590R |…
GO:0009888 - tissue development	0.000110518	0.00387843	1.5251	Over	12734	420	1491	75	BraA01g03000R | BraA01g04250R | BraA01g04450R | BraA01g11750R | BraA01g18990R | BraA01g28240R | BraA01g29030R | BraA02g09040R | BraA02g20710R | BraA02g28310R | BraA02g31930R | BraA02g41750R | BraA02g43470R | BraA02g44170R | BraA02g45330R | BraA03g01510R | BraA03g02540R | BraA03g05520R | BraA03g06330R | BraA03g09870R | BraA03g10480R | BraA03g26010R | BraA03g29610R | BraA03g30320R | BraA03g38040R |…
GO:0009648 - photoperiodism	0.000115889	0.00399426	2.17872	Over	12734	98	1491	25	BraA02g22320R | BraA02g31930R | BraA03g19450R | BraA03g20890R | BraA03g29770R | BraA03g54740R | BraA03g58410R | BraA04g24410R | BraA04g27180R | BraA05g03630R | BraA05g05270R | BraA05g06590R | BraA05g08130R | BraA05g09950R | BraA05g21610R | BraA06g06920R | BraA06g41100R | BraA07g35260R | BraA08g08640R | BraA08g15530R | BraA08g31930R | BraA08g34230R | BraA09g01320R | BraA09g30200R | BraA09g50820R
GO:0006468 - protein phosphorylation	0.000118028	0.00399426	1.40822	Over	12734	655	1491	108	BraA01g01380R | BraA01g01670R | BraA01g03000R | BraA01g04250R | BraA01g07380R | BraA01g33270R | BraA02g01870R | BraA02g09070R | BraA02g13560R | BraA02g19850R | BraA02g20830R | BraA02g26420R | BraA02g32770R | BraA02g36640R | BraA02g39060R | BraA02g40370R | BraA02g42160R | BraA02g42400R | BraA03g02540R | BraA03g06800R | BraA03g12630R | BraA03g13930R | BraA03g15540R | BraA03g16200R | BraA03g18280R |…
GO:0046777 - protein autophosphorylation	0.000118371	0.00399426	1.99066	Over	12734	133	1491	31	BraA01g01380R | BraA01g01670R | BraA01g03000R | BraA01g07380R | BraA02g09070R | BraA02g20830R | BraA02g42160R | BraA03g15540R | BraA03g20630R | BraA03g23650R | BraA03g26010R | BraA03g28290R | BraA03g44880R | BraA03g47590R | BraA03g50390R | BraA03g53540R | BraA03g53750R | BraA04g08310R | BraA05g06950R | BraA06g07170R | BraA06g07560R | BraA06g09110R | BraA07g33670R | BraA08g13350R | BraA08g31760R |…
GO:0006139 - nucleobase-containing compound metabolic process	0.000121161	0.00403667	1.18072	Over	12734	2604	1491	360	BraA01g01920R | BraA01g02340R | BraA01g03110R | BraA01g08210R | BraA01g10230R | BraA01g11200R | BraA01g11750R | BraA01g13210R | BraA01g19530R | BraA01g20730R | BraA01g22670R | BraA01g23310R | BraA01g26210R | BraA01g27220R | BraA01g28150R | BraA01g29030R | BraA01g29270R | BraA01g29340R | BraA01g30640R | BraA01g31590R | BraA01g33690R | BraA01g33920R | BraA01g35480R | BraA01g36270R | BraA02g02580R |…
GO:0050896 - response to stimulus	0.000140864	0.00463444	1.12161	Over	12734	4485	1491	589	BraA01g01380R | BraA01g01670R | BraA01g02340R | BraA01g03000R | BraA01g03110R | BraA01g03900R | BraA01g04250R | BraA01g04780R | BraA01g06640R | BraA01g07380R | BraA01g09950R | BraA01g09990R | BraA01g10230R | BraA01g12370R | BraA01g15600R | BraA01g19740R | BraA01g19890R | BraA01g22590R | BraA01g22840R | BraA01g23600R | BraA01g25220R | BraA01g26140R | BraA01g26210R | BraA01g27220R | BraA01g28150R |…
GO:1901360 - organic cyclic compound metabolic process	0.000152563	0.00495735	1.15932	Over	12734	3072	1491	417	BraA01g01920R | BraA01g02340R | BraA01g03110R | BraA01g06640R | BraA01g08210R | BraA01g10230R | BraA01g11200R | BraA01g11750R | BraA01g13210R | BraA01g19520R | BraA01g19530R | BraA01g20730R | BraA01g22670R | BraA01g23310R | BraA01g26210R | BraA01g27220R | BraA01g28150R | BraA01g29030R | BraA01g29270R | BraA01g29340R | BraA01g30640R | BraA01g31590R | BraA01g33270R | BraA01g33420R | BraA01g33690R |…
GO:0010054 - trichoblast differentiation	0.000160544	0.00515308	2.26377	Over	12734	83	1491	22	BraA01g03000R | BraA02g28310R | BraA02g45330R | BraA03g09870R | BraA03g29610R | BraA03g38040R | BraA03g47590R | BraA04g01910R | BraA04g24470R | BraA05g09870R | BraA05g27210R | BraA05g40040R | BraA06g25910R | BraA06g28490R | BraA07g03730R | BraA07g33970R | BraA08g13350R | BraA08g18250R | BraA08g27510R | BraA08g27520R | BraA09g01470R | BraA09g49030R
GO:0006887 - exocytosis	0.000169698	0.00538128	2.42195	Over	12734	67	1491	19	BraA01g14290R | BraA02g06210R | BraA02g24900R | BraA03g06000R | BraA03g34510R | BraA04g06350R | BraA04g06860R | BraA05g33430R | BraA06g09370R | BraA06g22310R | BraA06g34270R | BraA07g19880R | BraA07g20140R | BraA07g25410R | BraA07g27870R | BraA08g11180R | BraA09g42870R | BraA09g43400R | BraA09g60410R
GO:0009987 - cellular process	0.000185719	0.00573184	1.06247	Over	12734	8376	1491	1042	BraA01g01050R | BraA01g01380R | BraA01g01670R | BraA01g01920R | BraA01g02340R | BraA01g03000R | BraA01g03110R | BraA01g03930R | BraA01g04250R | BraA01g04450R | BraA01g04780R | BraA01g06570R | BraA01g06640R | BraA01g07380R | BraA01g08210R | BraA01g08330R | BraA01g09430R | BraA01g09990R | BraA01g10230R | BraA01g11120R | BraA01g11200R | BraA01g11750R | BraA01g12360R | BraA01g12370R | BraA01g13210R |…
GO:0045739 - positive regulation of DNA repair	0.000187287	0.00573184	8.54058	Over	12734	4	1491	4	BraA01g28150R | BraA04g04020R | BraA05g29060R | BraA09g46110R
GO:2001022 - positive regulation of response to DNA damage stimulus	0.000187287	0.00573184	8.54058	Over	12734	4	1491	4	BraA01g28150R | BraA04g04020R | BraA05g29060R | BraA09g46110R
GO:0045089 - positive regulation of innate immune response	0.000193945	0.00580079	2.62787	Over	12734	52	1491	16	BraA01g29270R | BraA01g33270R | BraA02g01870R | BraA02g05790R | BraA03g20630R | BraA03g23600R | BraA04g01480R | BraA04g04660R | BraA05g02340R | BraA05g06950R | BraA05g35070R | BraA07g20790R | BraA08g31860R | BraA09g45260R | BraA09g49930R | BraA10g30940R
GO:0080134 - regulation of response to stress	0.000193947	0.00580079	1.63412	Over	12734	277	1491	53	BraA01g15600R | BraA01g28150R | BraA01g29270R | BraA01g33270R | BraA02g01870R | BraA02g05790R | BraA02g06390R | BraA02g09590R | BraA02g15770R | BraA02g39060R | BraA02g40370R | BraA03g06930R | BraA03g09440R | BraA03g10480R | BraA03g20630R | BraA03g21290R | BraA03g23600R | BraA03g34510R | BraA03g45360R | BraA03g55660R | BraA04g01480R | BraA04g04020R | BraA04g04660R | BraA04g28050R | BraA05g02340R |…
GO:0006979 - response to oxidative stress	0.00021216	0.00627423	1.5341	Over	12734	373	1491	67	BraA01g03110R | BraA01g06640R | BraA02g02680R | BraA02g09640R | BraA02g09650R | BraA02g14580R | BraA02g17810R | BraA02g20830R | BraA02g22900R | BraA02g29680R | BraA02g44820R | BraA03g16570R | BraA03g19450R | BraA03g20690R | BraA03g23600R | BraA03g25230R | BraA03g47730R | BraA03g49910R | BraA03g57250R | BraA03g58410R | BraA04g24410R | BraA04g25610R | BraA05g02340R | BraA05g06840R | BraA05g08130R |…
GO:0019684 - photosynthesis, light reaction	0.000271788	0.00794828	0.254943	Under	12734	134	1491	4	BraA03g12620R | BraA05g06070R | BraA06g14080R | BraA10g14290R
GO:0048584 - positive regulation of response to stimulus	0.000285111	0.0082463	1.82268	Over	12734	164	1491	35	BraA01g28150R | BraA01g29270R | BraA01g33270R | BraA02g01870R | BraA02g05790R | BraA02g09590R | BraA02g15700R | BraA03g17270R | BraA03g20630R | BraA03g23600R | BraA03g55660R | BraA04g01480R | BraA04g04020R | BraA04g04660R | BraA05g02340R | BraA05g06950R | BraA05g17510R | BraA05g18870R | BraA05g29060R | BraA05g35070R | BraA06g02380R | BraA06g06920R | BraA06g17300R | BraA07g20790R | BraA08g17770R |…
GO:0007154 - cell communication	0.000317988	0.00843233	1.23458	Over	12734	1515	1491	219	BraA01g01380R | BraA01g01670R | BraA01g02340R | BraA01g03000R | BraA01g04250R | BraA01g07380R | BraA01g09990R | BraA01g19740R | BraA01g22590R | BraA01g26210R | BraA01g27220R | BraA01g29270R | BraA01g31590R | BraA01g33270R | BraA01g33360R | BraA02g01870R | BraA02g03460R | BraA02g05790R | BraA02g06390R | BraA02g09040R | BraA02g09070R | BraA02g09590R | BraA02g10190R | BraA02g13560R | BraA02g13720R |…
GO:0006950 - response to stress	0.00032644	0.00843233	1.1719	Over	12734	2507	1491	344	BraA01g03110R | BraA01g03900R | BraA01g04780R | BraA01g06640R | BraA01g07380R | BraA01g10230R | BraA01g12370R | BraA01g15600R | BraA01g19740R | BraA01g22840R | BraA01g25220R | BraA01g26140R | BraA01g26210R | BraA01g28150R | BraA01g29270R | BraA01g31590R | BraA01g32270R | BraA01g33270R | BraA01g33950R | BraA02g01870R | BraA02g02680R | BraA02g03460R | BraA02g03710R | BraA02g04030R | BraA02g05790R |…
GO:0044707 - single-multicellular organism process	0.000332937	0.00843233	1.19704	Over	12734	2012	1491	282	BraA01g01380R | BraA01g03000R | BraA01g04250R | BraA01g06640R | BraA01g08330R | BraA01g09990R | BraA01g11750R | BraA01g19740R | BraA01g23600R | BraA01g26210R | BraA01g26420R | BraA01g29030R | BraA01g29340R | BraA01g33360R | BraA01g34840R | BraA02g04000R | BraA02g09040R | BraA02g10090R | BraA02g13720R | BraA02g15890R | BraA02g15900R | BraA02g17810R | BraA02g20430R | BraA02g20710R | BraA02g22900R |…
GO:0007275 - multicellular organismal development	0.000341277	0.00843233	1.19853	Over	12734	1981	1491	278	BraA01g01380R | BraA01g03000R | BraA01g04250R | BraA01g06640R | BraA01g08330R | BraA01g09990R | BraA01g11750R | BraA01g19740R | BraA01g23600R | BraA01g26210R | BraA01g26420R | BraA01g29030R | BraA01g29340R | BraA01g33360R | BraA01g34840R | BraA02g04000R | BraA02g09040R | BraA02g10090R | BraA02g13720R | BraA02g15890R | BraA02g15900R | BraA02g17810R | BraA02g20430R | BraA02g20710R | BraA02g22900R |…
GO:0048731 - system development	0.000345243	0.00843233	1.23568	Over	12734	1486	1491	215	BraA01g03000R | BraA01g04250R | BraA01g06640R | BraA01g08330R | BraA01g11750R | BraA01g23600R | BraA01g26210R | BraA01g26420R | BraA01g29030R | BraA01g29340R | BraA01g33360R | BraA01g34840R | BraA02g09040R | BraA02g10090R | BraA02g13720R | BraA02g15890R | BraA02g15900R | BraA02g17810R | BraA02g20430R | BraA02g22900R | BraA02g25240R | BraA02g28120R | BraA02g28310R | BraA02g31930R | BraA02g36620R |…
GO:0052033 - pathogen-associated molecular pattern dependent induction by symbiont of host innate immune response	0.000352415	0.00843233	5.12435	Over	12734	10	1491	6	BraA01g33270R | BraA03g20630R | BraA04g01480R | BraA05g06950R | BraA05g35070R | BraA09g49930R
GO:0052166 - positive regulation by symbiont of host innate immune response	0.000352415	0.00843233	5.12435	Over	12734	10	1491	6	BraA01g33270R | BraA03g20630R | BraA04g01480R | BraA05g06950R | BraA05g35070R | BraA09g49930R
GO:0052167 - modulation by symbiont of host innate immune response	0.000352415	0.00843233	5.12435	Over	12734	10	1491	6	BraA01g33270R | BraA03g20630R | BraA04g01480R | BraA05g06950R | BraA05g35070R | BraA09g49930R
GO:0052169 - pathogen-associated molecular pattern dependent modulation by symbiont of host innate immune response	0.000352415	0.00843233	5.12435	Over	12734	10	1491	6	BraA01g33270R | BraA03g20630R | BraA04g01480R | BraA05g06950R | BraA05g35070R | BraA09g49930R
GO:0052257 - pathogen-associated molecular pattern dependent induction by organism of innate immune response of other organism involved in symbiotic interaction	0.000352415	0.00843233	5.12435	Over	12734	10	1491	6	BraA01g33270R | BraA03g20630R | BraA04g01480R | BraA05g06950R | BraA05g35070R | BraA09g49930R
GO:0052305 - positive regulation by organism of innate immune response in other organism involved in symbiotic interaction	0.000352415	0.00843233	5.12435	Over	12734	10	1491	6	BraA01g33270R | BraA03g20630R | BraA04g01480R | BraA05g06950R | BraA05g35070R | BraA09g49930R
GO:0052306 - modulation by organism of innate immune response in other organism involved in symbiotic interaction	0.000352415	0.00843233	5.12435	Over	12734	10	1491	6	BraA01g33270R | BraA03g20630R | BraA04g01480R | BraA05g06950R | BraA05g35070R | BraA09g49930R
GO:0052308 - pathogen-associated molecular pattern dependent modulation by organism of innate immune response in other organism involved in symbiotic interaction	0.000352415	0.00843233	5.12435	Over	12734	10	1491	6	BraA01g33270R | BraA03g20630R | BraA04g01480R | BraA05g06950R | BraA05g35070R | BraA09g49930R
GO:0052509 - positive regulation by symbiont of host defense response	0.000352415	0.00843233	5.12435	Over	12734	10	1491	6	BraA01g33270R | BraA03g20630R | BraA04g01480R | BraA05g06950R | BraA05g35070R | BraA09g49930R
GO:0052510 - positive regulation by organism of defense response of other organism involved in symbiotic interaction	0.000352415	0.00843233	5.12435	Over	12734	10	1491	6	BraA01g33270R | BraA03g20630R | BraA04g01480R | BraA05g06950R | BraA05g35070R | BraA09g49930R
GO:0018401 - peptidyl-proline hydroxylation to 4-hydroxy-L-proline	0.000352415	0.00843233	5.12435	Over	12734	10	1491	6	BraA05g40040R | BraA06g15380R | BraA06g28490R | BraA06g35000R | BraA07g03730R | BraA08g27110R
GO:0018126 - protein hydroxylation	0.000352415	0.00843233	5.12435	Over	12734	10	1491	6	BraA05g40040R | BraA06g15380R | BraA06g28490R | BraA06g35000R | BraA07g03730R | BraA08g27110R
GO:0019471 - 4-hydroxyproline metabolic process	0.000352415	0.00843233	5.12435	Over	12734	10	1491	6	BraA05g40040R | BraA06g15380R | BraA06g28490R | BraA06g35000R | BraA07g03730R | BraA08g27110R
GO:0019511 - peptidyl-proline hydroxylation	0.000352415	0.00843233	5.12435	Over	12734	10	1491	6	BraA05g40040R | BraA06g15380R | BraA06g28490R | BraA06g35000R | BraA07g03730R | BraA08g27110R
GO:0050793 - regulation of developmental process	0.000361285	0.0085667	1.41557	Over	12734	543	1491	90	BraA01g01380R | BraA01g01670R | BraA01g04250R | BraA01g08330R | BraA01g11750R | BraA01g26210R | BraA01g29030R | BraA01g29340R | BraA02g09040R | BraA02g13560R | BraA02g13720R | BraA02g20710R | BraA02g31930R | BraA02g44200R | BraA03g01760R | BraA03g05520R | BraA03g12630R | BraA03g20890R | BraA03g21290R | BraA03g29770R | BraA03g38340R | BraA03g42820R | BraA03g45070R | BraA03g45080R | BraA03g45360R |…
GO:0009649 - entrainment of circadian clock	0.0003745	0.00874086	6.10041	Over	12734	7	1491	5	BraA02g45210R | BraA03g20890R | BraA04g27180R | BraA05g06590R | BraA06g25720R
GO:0016070 - RNA metabolic process	0.000375273	0.00874086	1.18853	Over	12734	2127	1491	296	BraA01g01920R | BraA01g02340R | BraA01g03110R | BraA01g08210R | BraA01g10230R | BraA01g11200R | BraA01g11750R | BraA01g13210R | BraA01g19530R | BraA01g20730R | BraA01g22670R | BraA01g23310R | BraA01g26210R | BraA01g29030R | BraA01g29270R | BraA01g29340R | BraA01g30640R | BraA01g33690R | BraA01g33920R | BraA01g35480R | BraA01g36270R | BraA02g02580R | BraA02g02680R | BraA02g04000R | BraA02g04820R |…
GO:0043549 - regulation of kinase activity	0.000424383	0.00979803	3.28484	Over	12734	26	1491	10	BraA02g35850R | BraA03g02540R | BraA06g38250R | BraA07g11660R | BraA07g12100R | BraA07g22570R | BraA08g24160R | BraA09g35740R | BraA09g48090R | BraA10g30070R

## Sheet: MorningCopies
	P-Value	Adj_P-Value	Fold Enrichment	Enrichment Direction	TotalInRef	AnnInRef	TotalInTest	AnnInTest	GenesWithAnn
GO:0006412 - translation	6.55735e-24	1.52458e-20	2.53036	Over	12734	443	1420	125	BraA01g02360R | BraA01g12650R | BraA01g16110R | BraA01g30550R | BraA01g32210R | BraA01g32400R | BraA01g34690R | BraA02g09670R | BraA02g10100R | BraA02g13400R | BraA02g13780R | BraA02g18480R | BraA02g20270R | BraA02g20380R | BraA02g22070R | BraA02g22150R | BraA02g30810R | BraA02g35450R | BraA02g38710R | BraA02g43450R | BraA03g02260R | BraA03g02870R | BraA03g07250R | BraA03g09780R | BraA03g12880R |…
GO:1901576 - organic substance biosynthetic process	1.59275e-19	1.85157e-16	1.37491	Over	12734	3509	1420	538	BraA01g01030R | BraA01g01180R | BraA01g02360R | BraA01g04230R | BraA01g06400R | BraA01g08720R | BraA01g09180R | BraA01g09270R | BraA01g09740R | BraA01g10830R | BraA01g10910R | BraA01g12410R | BraA01g12650R | BraA01g13820R | BraA01g14010R | BraA01g16110R | BraA01g19870R | BraA01g22550R | BraA01g23770R | BraA01g24540R | BraA01g26010R | BraA01g26260R | BraA01g27380R | BraA01g28640R | BraA01g30290R |…
GO:0009058 - biosynthetic process	2.87683e-18	2.22955e-15	1.34818	Over	12734	3685	1420	554	BraA01g01030R | BraA01g01180R | BraA01g02360R | BraA01g04230R | BraA01g06400R | BraA01g08720R | BraA01g09180R | BraA01g09270R | BraA01g09740R | BraA01g10830R | BraA01g10910R | BraA01g12410R | BraA01g12650R | BraA01g13820R | BraA01g14010R | BraA01g16110R | BraA01g19870R | BraA01g22550R | BraA01g23770R | BraA01g24540R | BraA01g26010R | BraA01g26260R | BraA01g26770R | BraA01g27380R | BraA01g28640R |…
GO:0044249 - cellular biosynthetic process	9.2815e-18	5.39487e-15	1.35983	Over	12734	3449	1420	523	BraA01g01030R | BraA01g01180R | BraA01g02360R | BraA01g04230R | BraA01g06400R | BraA01g08720R | BraA01g09180R | BraA01g09270R | BraA01g09740R | BraA01g10830R | BraA01g10910R | BraA01g12410R | BraA01g12650R | BraA01g13820R | BraA01g14010R | BraA01g16110R | BraA01g19870R | BraA01g22550R | BraA01g23770R | BraA01g26010R | BraA01g26260R | BraA01g26770R | BraA01g27380R | BraA01g28640R | BraA01g30290R |…
GO:0034645 - cellular macromolecule biosynthetic process	4.0088e-15	1.86409e-12	1.42973	Over	12734	2327	1420	371	BraA01g01030R | BraA01g01180R | BraA01g02360R | BraA01g04230R | BraA01g06400R | BraA01g09180R | BraA01g10830R | BraA01g10910R | BraA01g12410R | BraA01g12650R | BraA01g16110R | BraA01g26010R | BraA01g26260R | BraA01g27380R | BraA01g28640R | BraA01g30290R | BraA01g30550R | BraA01g31940R | BraA01g32210R | BraA01g32400R | BraA01g32450R | BraA01g32720R | BraA01g34690R | BraA01g36000R | BraA02g04330R |…
GO:0009059 - macromolecule biosynthetic process	6.33087e-15	2.45321e-12	1.42192	Over	12734	2365	1420	375	BraA01g01030R | BraA01g01180R | BraA01g02360R | BraA01g04230R | BraA01g06400R | BraA01g09180R | BraA01g10830R | BraA01g10910R | BraA01g12410R | BraA01g12650R | BraA01g16110R | BraA01g26010R | BraA01g26260R | BraA01g27380R | BraA01g28640R | BraA01g30290R | BraA01g30550R | BraA01g31940R | BraA01g32210R | BraA01g32400R | BraA01g32450R | BraA01g32720R | BraA01g34690R | BraA01g36000R | BraA02g04330R |…
GO:0006091 - generation of precursor metabolites and energy	2.82893e-13	9.39607e-11	2.32276	Over	12734	305	1420	79	BraA01g06390R | BraA01g20950R | BraA01g21650R | BraA02g06810R | BraA02g18680R | BraA02g24060R | BraA02g26310R | BraA02g34430R | BraA02g46620R | BraA03g04500R | BraA03g11970R | BraA03g13690R | BraA03g18780R | BraA03g24500R | BraA03g26800R | BraA03g27690R | BraA03g28280R | BraA03g29400R | BraA03g39630R | BraA03g49720R | BraA03g51010R | BraA04g01870R | BraA04g07420R | BraA04g10010R | BraA04g14830R |…
GO:0015979 - photosynthesis	4.31497e-12	1.25404e-09	2.34229	Over	12734	268	1420	70	BraA01g01600R | BraA01g06390R | BraA01g13870R | BraA01g20950R | BraA01g21650R | BraA01g23770R | BraA01g24950R | BraA02g18680R | BraA02g23300R | BraA02g24060R | BraA02g34430R | BraA02g46620R | BraA03g26800R | BraA03g27690R | BraA03g28280R | BraA03g29400R | BraA03g39040R | BraA03g39820R | BraA03g49720R | BraA03g52740R | BraA03g53610R | BraA04g01870R | BraA04g02280R | BraA04g10010R | BraA04g14830R |…
GO:0010467 - gene expression	5.66306e-12	1.46296e-09	1.36642	Over	12734	2402	1420	366	BraA01g01030R | BraA01g01180R | BraA01g02360R | BraA01g05190R | BraA01g09180R | BraA01g09740R | BraA01g10830R | BraA01g10910R | BraA01g12410R | BraA01g12650R | BraA01g16110R | BraA01g20080R | BraA01g26010R | BraA01g26260R | BraA01g27380R | BraA01g28640R | BraA01g29510R | BraA01g30290R | BraA01g30550R | BraA01g31940R | BraA01g32210R | BraA01g32400R | BraA01g32450R | BraA01g32720R | BraA01g34690R |…
GO:0009987 - cellular process	4.25049e-11	9.45341e-09	1.1156	Over	12734	8376	1420	1042	BraA01g01030R | BraA01g01180R | BraA01g01600R | BraA01g01730R | BraA01g02330R | BraA01g02360R | BraA01g02990R | BraA01g03350R | BraA01g04180R | BraA01g04230R | BraA01g05190R | BraA01g05860R | BraA01g06390R | BraA01g06400R | BraA01g06410R | BraA01g07720R | BraA01g08720R | BraA01g09180R | BraA01g09270R | BraA01g09740R | BraA01g10340R | BraA01g10390R | BraA01g10830R | BraA01g10910R | BraA01g11460R |…
GO:0044237 - cellular metabolic process	4.47258e-11	9.45341e-09	1.15862	Over	12734	6517	1420	842	BraA01g01030R | BraA01g01180R | BraA01g01600R | BraA01g01730R | BraA01g02330R | BraA01g02360R | BraA01g02990R | BraA01g04230R | BraA01g05190R | BraA01g06390R | BraA01g06400R | BraA01g06410R | BraA01g07720R | BraA01g08720R | BraA01g09180R | BraA01g09270R | BraA01g09740R | BraA01g10340R | BraA01g10390R | BraA01g10830R | BraA01g10910R | BraA01g11460R | BraA01g11540R | BraA01g12410R | BraA01g12650R |…
GO:0042254 - ribosome biogenesis	8.86357e-11	1.71732e-08	2.37029	Over	12734	227	1420	60	BraA01g09180R | BraA01g13680R | BraA01g16110R | BraA01g20080R | BraA02g07070R | BraA02g09670R | BraA02g14140R | BraA02g20270R | BraA02g20380R | BraA03g02260R | BraA03g09780R | BraA03g20570R | BraA03g23920R | BraA03g26590R | BraA03g28060R | BraA03g28790R | BraA03g30080R | BraA03g36130R | BraA03g36930R | BraA03g42800R | BraA03g45570R | BraA03g58150R | BraA04g02500R | BraA04g04710R | BraA04g07080R |…
GO:0019684 - photosynthesis, light reaction	2.85237e-09	5.10135e-07	2.6769	Over	12734	134	1420	40	BraA01g06390R | BraA01g20950R | BraA01g21650R | BraA02g18680R | BraA02g24060R | BraA02g34430R | BraA02g46620R | BraA03g26800R | BraA03g27690R | BraA03g28280R | BraA03g29400R | BraA03g49720R | BraA04g01870R | BraA04g10010R | BraA06g05920R | BraA06g29670R | BraA06g39270R | BraA07g07590R | BraA07g16120R | BraA07g20320R | BraA07g23110R | BraA07g29530R | BraA07g31320R | BraA07g37420R | BraA08g07570R |…
GO:0015995 - chlorophyll biosynthetic process	6.18362e-09	1.02692e-06	3.17147	Over	12734	82	1420	29	BraA01g08720R | BraA01g09740R | BraA01g13820R | BraA01g19870R | BraA01g23770R | BraA02g23300R | BraA02g25770R | BraA02g31960R | BraA02g34430R | BraA03g04270R | BraA03g12010R | BraA03g39820R | BraA03g45450R | BraA03g51260R | BraA03g52040R | BraA04g27920R | BraA05g02680R | BraA05g23030R | BraA06g39270R | BraA06g41080R | BraA07g01280R | BraA07g22250R | BraA07g36650R | BraA08g34530R | BraA09g18100R |…
GO:0022613 - ribonucleoprotein complex biogenesis	1.12569e-08	1.74482e-06	2.08237	Over	12734	267	1420	62	BraA01g09180R | BraA01g13680R | BraA01g16110R | BraA01g20080R | BraA01g24170R | BraA02g07070R | BraA02g09670R | BraA02g14140R | BraA02g20270R | BraA02g20380R | BraA03g02260R | BraA03g09780R | BraA03g20570R | BraA03g23920R | BraA03g26590R | BraA03g28060R | BraA03g28790R | BraA03g30080R | BraA03g36130R | BraA03g36930R | BraA03g42800R | BraA03g45570R | BraA03g58150R | BraA04g02500R | BraA04g04710R |…
GO:0009628 - response to abiotic stimulus	2.45121e-08	3.56192e-06	1.34759	Over	12734	1830	1420	275	BraA01g04230R | BraA01g07720R | BraA01g09740R | BraA01g10390R | BraA01g10910R | BraA01g19870R | BraA01g20950R | BraA01g21650R | BraA01g22140R | BraA01g23580R | BraA01g23770R | BraA01g24540R | BraA01g26010R | BraA01g26730R | BraA01g27380R | BraA01g30290R | BraA01g31570R | BraA01g31740R | BraA01g32390R | BraA01g35660R | BraA01g36000R | BraA02g01630R | BraA02g03040R | BraA02g04330R | BraA02g06240R |…
GO:0006779 - porphyrin-containing compound biosynthetic process	3.81455e-08	5.21696e-06	2.95523	Over	12734	88	1420	29	BraA01g08720R | BraA01g09740R | BraA01g13820R | BraA01g19870R | BraA01g23770R | BraA02g23300R | BraA02g25770R | BraA02g31960R | BraA02g34430R | BraA03g04270R | BraA03g12010R | BraA03g39820R | BraA03g45450R | BraA03g51260R | BraA03g52040R | BraA04g27920R | BraA05g02680R | BraA05g23030R | BraA06g39270R | BraA06g41080R | BraA07g01280R | BraA07g22250R | BraA07g36650R | BraA08g34530R | BraA09g18100R |…
GO:0015994 - chlorophyll metabolic process	4.69044e-08	6.05849e-06	2.71496	Over	12734	109	1420	33	BraA01g06410R | BraA01g08720R | BraA01g09740R | BraA01g13820R | BraA01g19870R | BraA01g23770R | BraA02g23300R | BraA02g25770R | BraA02g31780R | BraA02g31960R | BraA02g34430R | BraA03g04270R | BraA03g12010R | BraA03g39820R | BraA03g45450R | BraA03g51260R | BraA03g52040R | BraA04g27920R | BraA05g02680R | BraA05g23030R | BraA06g39270R | BraA06g41080R | BraA07g01280R | BraA07g22250R | BraA07g36650R |…
GO:0046148 - pigment biosynthetic process	6.27239e-08	7.67543e-06	2.42368	Over	12734	148	1420	40	BraA01g08720R | BraA01g09270R | BraA01g09740R | BraA01g13820R | BraA01g19870R | BraA01g23770R | BraA01g24540R | BraA02g20550R | BraA02g23300R | BraA02g25770R | BraA02g31960R | BraA02g34430R | BraA03g04270R | BraA03g08200R | BraA03g12010R | BraA03g34620R | BraA03g39820R | BraA03g45450R | BraA03g51260R | BraA03g51770R | BraA03g52040R | BraA04g27920R | BraA05g02680R | BraA05g23030R | BraA05g24220R |…
GO:0033014 - tetrapyrrole biosynthetic process	6.68328e-08	7.76932e-06	2.88956	Over	12734	90	1420	29	BraA01g08720R | BraA01g09740R | BraA01g13820R | BraA01g19870R | BraA01g23770R | BraA02g23300R | BraA02g25770R | BraA02g31960R | BraA02g34430R | BraA03g04270R | BraA03g12010R | BraA03g39820R | BraA03g45450R | BraA03g51260R | BraA03g52040R | BraA04g27920R | BraA05g02680R | BraA05g23030R | BraA06g39270R | BraA06g41080R | BraA07g01280R | BraA07g22250R | BraA07g36650R | BraA08g34530R | BraA09g18100R |…
GO:0035303 - regulation of dephosphorylation	1.16199e-07	1.28649e-05	7.33713	Over	12734	11	1420	9	BraA02g46620R | BraA06g39540R | BraA07g12540R | BraA07g16120R | BraA08g12680R | BraA08g24810R | BraA09g10250R | BraA09g22160R | BraA09g36330R
GO:0006096 - glycolytic process	1.3032e-07	1.37725e-05	3.16504	Over	12734	68	1420	24	BraA02g26310R | BraA03g18780R | BraA03g51010R | BraA04g07420R | BraA04g14830R | BraA04g14940R | BraA04g25310R | BraA05g09280R | BraA05g18690R | BraA06g03610R | BraA06g08940R | BraA06g09690R | BraA06g36310R | BraA06g42390R | BraA06g42400R | BraA08g22160R | BraA08g22900R | BraA08g29920R | BraA09g33470R | BraA09g42300R | BraA09g53420R | BraA09g53530R | BraA09g60130R | BraA10g08850R
GO:0008152 - metabolic process	1.42894e-07	1.44447e-05	1.10518	Over	12734	7603	1420	937	BraA01g01030R | BraA01g01180R | BraA01g01600R | BraA01g01730R | BraA01g02330R | BraA01g02360R | BraA01g02990R | BraA01g03340R | BraA01g04230R | BraA01g05190R | BraA01g06390R | BraA01g06400R | BraA01g06410R | BraA01g07720R | BraA01g08720R | BraA01g09180R | BraA01g09270R | BraA01g09740R | BraA01g10340R | BraA01g10390R | BraA01g10830R | BraA01g10910R | BraA01g11460R | BraA01g11540R | BraA01g12410R |…
GO:0006090 - pyruvate metabolic process	1.51531e-07	1.46795e-05	2.85333	Over	12734	88	1420	28	BraA01g13820R | BraA01g13870R | BraA02g26310R | BraA03g18780R | BraA03g45450R | BraA03g51010R | BraA04g07420R | BraA04g14830R | BraA04g14940R | BraA04g25310R | BraA05g09280R | BraA05g18690R | BraA06g03610R | BraA06g08940R | BraA06g09690R | BraA06g24880R | BraA06g36310R | BraA06g42390R | BraA06g42400R | BraA08g22160R | BraA08g22900R | BraA08g29920R | BraA09g33470R | BraA09g42300R | BraA09g53420R |…
GO:0018130 - heterocycle biosynthetic process	2.16089e-07	2.00963e-05	1.30341	Over	12734	2009	1420	292	BraA01g01030R | BraA01g01180R | BraA01g08720R | BraA01g09180R | BraA01g09740R | BraA01g10830R | BraA01g10910R | BraA01g12410R | BraA01g13820R | BraA01g14010R | BraA01g19870R | BraA01g23770R | BraA01g26010R | BraA01g26260R | BraA01g27380R | BraA01g28640R | BraA01g30290R | BraA01g31940R | BraA01g32450R | BraA01g32720R | BraA01g33430R | BraA01g36000R | BraA02g03920R | BraA02g04330R | BraA02g05100R |…
GO:0042440 - pigment metabolic process	2.34699e-07	2.09875e-05	2.21671	Over	12734	178	1420	44	BraA01g06410R | BraA01g08720R | BraA01g09270R | BraA01g09740R | BraA01g13820R | BraA01g19870R | BraA01g23770R | BraA01g24540R | BraA02g20550R | BraA02g23300R | BraA02g25770R | BraA02g31780R | BraA02g31960R | BraA02g34430R | BraA03g04270R | BraA03g08200R | BraA03g12010R | BraA03g34620R | BraA03g39820R | BraA03g45450R | BraA03g51260R | BraA03g51770R | BraA03g52040R | BraA04g27920R | BraA05g02680R |…
GO:0009416 - response to light stimulus	3.00288e-07	2.49768e-05	1.56473	Over	12734	682	1420	119	BraA01g09740R | BraA01g19870R | BraA01g20950R | BraA01g21650R | BraA01g23770R | BraA01g27380R | BraA01g35660R | BraA01g36000R | BraA02g06880R | BraA02g15690R | BraA02g18680R | BraA02g20110R | BraA02g20380R | BraA02g25320R | BraA02g25770R | BraA02g33240R | BraA02g46620R | BraA03g16060R | BraA03g18780R | BraA03g19540R | BraA03g20570R | BraA03g20660R | BraA03g21830R | BraA03g22120R | BraA03g23590R |…
GO:0006778 - porphyrin-containing compound metabolic process	3.00796e-07	2.49768e-05	2.52932	Over	12734	117	1420	33	BraA01g06410R | BraA01g08720R | BraA01g09740R | BraA01g13820R | BraA01g19870R | BraA01g23770R | BraA02g23300R | BraA02g25770R | BraA02g31780R | BraA02g31960R | BraA02g34430R | BraA03g04270R | BraA03g12010R | BraA03g39820R | BraA03g45450R | BraA03g51260R | BraA03g52040R | BraA04g27920R | BraA05g02680R | BraA05g23030R | BraA06g39270R | BraA06g41080R | BraA07g01280R | BraA07g22250R | BraA07g36650R |…
GO:0033013 - tetrapyrrole metabolic process	3.73556e-07	2.99489e-05	2.50789	Over	12734	118	1420	33	BraA01g06410R | BraA01g08720R | BraA01g09740R | BraA01g13820R | BraA01g19870R | BraA01g23770R | BraA02g23300R | BraA02g25770R | BraA02g31780R | BraA02g31960R | BraA02g34430R | BraA03g04270R | BraA03g12010R | BraA03g39820R | BraA03g45450R | BraA03g51260R | BraA03g52040R | BraA04g27920R | BraA05g02680R | BraA05g23030R | BraA06g39270R | BraA06g41080R | BraA07g01280R | BraA07g22250R | BraA07g36650R |…
GO:0044271 - cellular nitrogen compound biosynthetic process	5.52381e-07	4.28095e-05	1.29259	Over	12734	2005	1420	289	BraA01g01030R | BraA01g01180R | BraA01g08720R | BraA01g09180R | BraA01g09740R | BraA01g10830R | BraA01g10910R | BraA01g12410R | BraA01g13820R | BraA01g14010R | BraA01g19870R | BraA01g23770R | BraA01g26010R | BraA01g26260R | BraA01g27380R | BraA01g28640R | BraA01g30290R | BraA01g31940R | BraA01g32450R | BraA01g32720R | BraA01g33430R | BraA01g36000R | BraA02g03920R | BraA02g04330R | BraA02g05100R |…
GO:0016052 - carbohydrate catabolic process	6.31825e-07	4.73869e-05	2.16633	Over	12734	178	1420	43	BraA01g16270R | BraA02g09290R | BraA02g15560R | BraA02g24040R | BraA02g26310R | BraA03g08980R | BraA03g18780R | BraA03g40390R | BraA03g51010R | BraA04g07420R | BraA04g14830R | BraA04g14940R | BraA04g25310R | BraA05g09280R | BraA05g16530R | BraA05g18690R | BraA06g01500R | BraA06g03610R | BraA06g08940R | BraA06g09690R | BraA06g17570R | BraA06g23500R | BraA06g26320R | BraA06g36310R | BraA06g42390R |…
GO:0009314 - response to radiation	7.08057e-07	5.14448e-05	1.53989	Over	12734	693	1420	119	BraA01g09740R | BraA01g19870R | BraA01g20950R | BraA01g21650R | BraA01g23770R | BraA01g27380R | BraA01g35660R | BraA01g36000R | BraA02g06880R | BraA02g15690R | BraA02g18680R | BraA02g20110R | BraA02g20380R | BraA02g25320R | BraA02g25770R | BraA02g33240R | BraA02g46620R | BraA03g16060R | BraA03g18780R | BraA03g19540R | BraA03g20570R | BraA03g20660R | BraA03g21830R | BraA03g22120R | BraA03g23590R |…
GO:1901362 - organic cyclic compound biosynthetic process	9.60224e-07	6.76521e-05	1.2745	Over	12734	2139	1420	304	BraA01g01030R | BraA01g01180R | BraA01g08720R | BraA01g09180R | BraA01g09740R | BraA01g10830R | BraA01g10910R | BraA01g12410R | BraA01g13820R | BraA01g14010R | BraA01g19870R | BraA01g23770R | BraA01g26010R | BraA01g26260R | BraA01g27380R | BraA01g28640R | BraA01g30290R | BraA01g31940R | BraA01g32450R | BraA01g32720R | BraA01g33430R | BraA01g36000R | BraA02g03920R | BraA02g04330R | BraA02g05100R |…
GO:0006468 - protein phosphorylation	2.07604e-06	0.000140467	0.533949	Under	12734	655	1420	39	BraA01g02990R | BraA01g22470R | BraA01g22610R | BraA01g23580R | BraA01g30170R | BraA02g07610R | BraA02g12610R | BraA03g02180R | BraA03g07640R | BraA03g15920R | BraA03g23590R | BraA03g39660R | BraA03g42410R | BraA04g16420R | BraA04g16570R | BraA04g20940R | BraA05g02360R | BraA05g22810R | BraA05g23370R | BraA05g31090R | BraA05g38680R | BraA05g38740R | BraA05g39200R | BraA07g01480R | BraA07g08740R |…
GO:0071704 - organic substance metabolic process	2.11456e-06	0.000140467	1.10957	Over	12734	6700	1420	829	BraA01g01030R | BraA01g01180R | BraA01g01730R | BraA01g02330R | BraA01g02360R | BraA01g02990R | BraA01g04230R | BraA01g05190R | BraA01g06400R | BraA01g06410R | BraA01g07720R | BraA01g08720R | BraA01g09180R | BraA01g09270R | BraA01g09740R | BraA01g10340R | BraA01g10390R | BraA01g10830R | BraA01g10910R | BraA01g11460R | BraA01g11540R | BraA01g12410R | BraA01g12650R | BraA01g13820R | BraA01g13870R |…
GO:0006006 - glucose metabolic process	2.7765e-06	0.000179316	3.15527	Over	12734	54	1420	19	BraA02g26310R | BraA03g06210R | BraA03g51010R | BraA04g14830R | BraA04g14940R | BraA06g08940R | BraA06g09690R | BraA06g36310R | BraA06g42390R | BraA06g42400R | BraA07g20580R | BraA08g22160R | BraA08g25900R | BraA08g29920R | BraA09g44740R | BraA09g53420R | BraA09g53530R | BraA09g60130R | BraA10g24200R
GO:0009765 - photosynthesis, light harvesting	3.4731e-06	0.000218242	3.22834	Over	12734	50	1420	18	BraA01g21650R | BraA02g24060R | BraA02g34430R | BraA03g26800R | BraA04g01870R | BraA06g05920R | BraA06g39270R | BraA07g07590R | BraA07g20320R | BraA07g23110R | BraA07g37420R | BraA08g22990R | BraA09g16580R | BraA09g22500R | BraA09g27650R | BraA09g33660R | BraA09g43900R | BraA09g62370R
GO:0044724 - single-organism carbohydrate catabolic process	5.57276e-06	0.000340965	2.5769	Over	12734	87	1420	25	BraA02g26310R | BraA03g18780R | BraA03g51010R | BraA04g07420R | BraA04g14830R | BraA04g14940R | BraA04g25310R | BraA05g09280R | BraA05g18690R | BraA06g03610R | BraA06g08940R | BraA06g09690R | BraA06g36310R | BraA06g42390R | BraA06g42400R | BraA08g22160R | BraA08g22900R | BraA08g25900R | BraA08g29920R | BraA09g33470R | BraA09g42300R | BraA09g53420R | BraA09g53530R | BraA09g60130R | BraA10g08850R
GO:0080167 - response to karrikin	6.97846e-06	0.000407919	2.13797	Over	12734	151	1420	36	BraA01g22140R | BraA01g23770R | BraA01g24540R | BraA01g27380R | BraA02g20550R | BraA03g15660R | BraA03g23980R | BraA03g23990R | BraA03g28280R | BraA03g30870R | BraA03g39820R | BraA03g43710R | BraA04g07650R | BraA04g25550R | BraA05g06650R | BraA05g08820R | BraA05g14460R | BraA05g23030R | BraA05g24220R | BraA05g28490R | BraA07g04780R | BraA07g12560R | BraA07g24340R | BraA07g28460R | BraA07g33570R |…
GO:0044085 - cellular component biogenesis	7.0498e-06	0.000407919	1.46632	Over	12734	740	1420	121	BraA01g03350R | BraA01g04180R | BraA01g04230R | BraA01g09180R | BraA01g13680R | BraA01g15960R | BraA01g16110R | BraA01g20080R | BraA01g24170R | BraA02g07070R | BraA02g09670R | BraA02g14140R | BraA02g14440R | BraA02g20270R | BraA02g20380R | BraA02g23850R | BraA02g36000R | BraA02g45620R | BraA02g46620R | BraA03g02260R | BraA03g09590R | BraA03g09780R | BraA03g10700R | BraA03g16100R | BraA03g17540R |…
GO:0051186 - cofactor metabolic process	7.19341e-06	0.000407919	1.77547	Over	12734	298	1420	59	BraA01g06410R | BraA01g08720R | BraA01g09740R | BraA01g13820R | BraA01g14010R | BraA01g19870R | BraA01g22580R | BraA01g23770R | BraA01g33430R | BraA02g23300R | BraA02g25760R | BraA02g25770R | BraA02g31780R | BraA02g31960R | BraA02g34430R | BraA03g04270R | BraA03g06210R | BraA03g11970R | BraA03g12010R | BraA03g13690R | BraA03g17960R | BraA03g34620R | BraA03g39050R | BraA03g39820R | BraA03g45450R |…
GO:0019438 - aromatic compound biosynthetic process	9.15951e-06	0.000507044	1.25406	Over	12734	2038	1420	285	BraA01g01030R | BraA01g01180R | BraA01g08720R | BraA01g09180R | BraA01g09740R | BraA01g10830R | BraA01g10910R | BraA01g12410R | BraA01g13820R | BraA01g14010R | BraA01g19870R | BraA01g23770R | BraA01g26010R | BraA01g26260R | BraA01g27380R | BraA01g28640R | BraA01g30290R | BraA01g31940R | BraA01g32450R | BraA01g32720R | BraA01g33430R | BraA01g36000R | BraA02g03920R | BraA02g04330R | BraA02g05100R |…
GO:0009723 - response to ethylene	9.42788e-06	0.000509763	1.8605	Over	12734	241	1420	50	BraA01g28800R | BraA01g30290R | BraA02g05100R | BraA02g20550R | BraA02g21280R | BraA02g39290R | BraA02g42770R | BraA02g43990R | BraA03g02180R | BraA03g11230R | BraA03g13410R | BraA03g14750R | BraA03g36420R | BraA03g42390R | BraA03g60570R | BraA04g11970R | BraA04g30550R | BraA05g22510R | BraA05g25360R | BraA06g08700R | BraA06g10670R | BraA06g14510R | BraA06g38370R | BraA07g12540R | BraA07g15580R |…
GO:0010380 - regulation of chlorophyll biosynthetic process	1.16261e-05	0.000614334	3.76061	Over	12734	31	1420	13	BraA01g09740R | BraA01g23770R | BraA02g31960R | BraA02g34430R | BraA03g12010R | BraA03g39820R | BraA03g52040R | BraA05g23030R | BraA06g39270R | BraA06g41080R | BraA07g01280R | BraA09g22500R | BraA09g53860R
GO:0035304 - regulation of protein dephosphorylation	1.20642e-05	0.000623317	7.68652	Over	12734	7	1420	6	BraA02g46620R | BraA07g12540R | BraA07g16120R | BraA08g24810R | BraA09g10250R | BraA09g36330R
GO:0044238 - primary metabolic process	1.26683e-05	0.000640299	1.10803	Over	12734	6248	1420	772	BraA01g01030R | BraA01g01180R | BraA01g01730R | BraA01g02330R | BraA01g02360R | BraA01g02990R | BraA01g04230R | BraA01g05190R | BraA01g06400R | BraA01g09180R | BraA01g09270R | BraA01g10340R | BraA01g10390R | BraA01g10830R | BraA01g10910R | BraA01g11460R | BraA01g11540R | BraA01g12410R | BraA01g12650R | BraA01g13820R | BraA01g14010R | BraA01g16110R | BraA01g16270R | BraA01g20080R | BraA01g21650R |…
GO:0006413 - translational initiation	1.29583e-05	0.000641023	2.57819	Over	12734	80	1420	23	BraA01g02360R | BraA01g30550R | BraA01g32400R | BraA02g10100R | BraA02g22070R | BraA02g22150R | BraA02g38710R | BraA03g13770R | BraA03g35800R | BraA03g55310R | BraA04g24050R | BraA05g33830R | BraA06g07920R | BraA06g35710R | BraA08g12740R | BraA08g17970R | BraA08g25250R | BraA08g34360R | BraA09g36830R | BraA09g61270R | BraA10g03350R | BraA10g12260R | BraA10g18570R
GO:0051188 - cofactor biosynthetic process	1.44079e-05	0.000694517	1.9515	Over	12734	193	1420	42	BraA01g08720R | BraA01g09740R | BraA01g13820R | BraA01g19870R | BraA01g23770R | BraA01g33430R | BraA02g23300R | BraA02g25760R | BraA02g25770R | BraA02g31960R | BraA02g34430R | BraA03g04270R | BraA03g12010R | BraA03g17960R | BraA03g34620R | BraA03g39050R | BraA03g39820R | BraA03g45450R | BraA03g51260R | BraA03g52040R | BraA04g27920R | BraA05g02680R | BraA05g08990R | BraA05g10610R | BraA05g23030R |…
GO:0031326 - regulation of cellular biosynthetic process	1.46371e-05	0.000694517	1.2744	Over	12734	1724	1420	245	BraA01g01030R | BraA01g01180R | BraA01g02360R | BraA01g09180R | BraA01g09740R | BraA01g10830R | BraA01g10910R | BraA01g12410R | BraA01g23770R | BraA01g26010R | BraA01g26260R | BraA01g27380R | BraA01g28640R | BraA01g30290R | BraA01g31940R | BraA01g32450R | BraA01g32720R | BraA01g36000R | BraA02g04330R | BraA02g05100R | BraA02g05530R | BraA02g06150R | BraA02g06880R | BraA02g07220R | BraA02g07990R |…
GO:0009889 - regulation of biosynthetic process	1.51472e-05	0.000704345	1.27226	Over	12734	1741	1420	247	BraA01g01030R | BraA01g01180R | BraA01g02360R | BraA01g09180R | BraA01g09740R | BraA01g10830R | BraA01g10910R | BraA01g12410R | BraA01g23770R | BraA01g26010R | BraA01g26260R | BraA01g27380R | BraA01g28640R | BraA01g30290R | BraA01g31940R | BraA01g32450R | BraA01g32720R | BraA01g36000R | BraA02g04330R | BraA02g05100R | BraA02g05530R | BraA02g06150R | BraA02g06880R | BraA02g07220R | BraA02g07990R |…
GO:1901463 - regulation of tetrapyrrole biosynthetic process	1.75911e-05	0.000801946	3.64309	Over	12734	32	1420	13	BraA01g09740R | BraA01g23770R | BraA02g31960R | BraA02g34430R | BraA03g12010R | BraA03g39820R | BraA03g52040R | BraA05g23030R | BraA06g39270R | BraA06g41080R | BraA07g01280R | BraA09g22500R | BraA09g53860R
GO:0006094 - gluconeogenesis	1.94142e-05	0.00086804	3.84326	Over	12734	28	1420	12	BraA03g51010R | BraA04g14830R | BraA04g14940R | BraA06g09690R | BraA06g42390R | BraA06g42400R | BraA07g20580R | BraA08g22160R | BraA08g29920R | BraA09g44740R | BraA09g53420R | BraA09g53530R
GO:0031323 - regulation of cellular metabolic process	2.19499e-05	0.000962897	1.25108	Over	12734	1921	1420	268	BraA01g01030R | BraA01g01180R | BraA01g02360R | BraA01g09180R | BraA01g09740R | BraA01g10830R | BraA01g10910R | BraA01g12410R | BraA01g14010R | BraA01g23770R | BraA01g26010R | BraA01g26260R | BraA01g27380R | BraA01g28640R | BraA01g30290R | BraA01g31940R | BraA01g32450R | BraA01g32720R | BraA01g36000R | BraA02g04330R | BraA02g05100R | BraA02g05530R | BraA02g06150R | BraA02g06880R | BraA02g07220R |…
GO:0009768 - photosynthesis, light harvesting in photosystem I	2.60778e-05	0.0011228	3.53269	Over	12734	33	1420	13	BraA01g21650R | BraA03g26800R | BraA04g01870R | BraA06g05920R | BraA07g07590R | BraA07g20320R | BraA07g23110R | BraA08g22990R | BraA09g16580R | BraA09g27650R | BraA09g33660R | BraA09g43900R | BraA09g62370R
GO:0006355 - regulation of transcription, DNA-templated	2.95811e-05	0.00125047	1.27945	Over	12734	1563	1420	223	BraA01g01030R | BraA01g01180R | BraA01g09180R | BraA01g10830R | BraA01g10910R | BraA01g12410R | BraA01g26010R | BraA01g26260R | BraA01g27380R | BraA01g28640R | BraA01g30290R | BraA01g31940R | BraA01g32450R | BraA01g32720R | BraA01g36000R | BraA02g04330R | BraA02g05100R | BraA02g05530R | BraA02g06150R | BraA02g06880R | BraA02g07220R | BraA02g07990R | BraA02g17680R | BraA02g20550R | BraA02g20980R |…
GO:1903506 - regulation of nucleic acid-templated transcription	3.08641e-05	0.00125643	1.27863	Over	12734	1564	1420	223	BraA01g01030R | BraA01g01180R | BraA01g09180R | BraA01g10830R | BraA01g10910R | BraA01g12410R | BraA01g26010R | BraA01g26260R | BraA01g27380R | BraA01g28640R | BraA01g30290R | BraA01g31940R | BraA01g32450R | BraA01g32720R | BraA01g36000R | BraA02g04330R | BraA02g05100R | BraA02g05530R | BraA02g06150R | BraA02g06880R | BraA02g07220R | BraA02g07990R | BraA02g17680R | BraA02g20550R | BraA02g20980R |…
GO:2001141 - regulation of RNA biosynthetic process	3.08641e-05	0.00125643	1.27863	Over	12734	1564	1420	223	BraA01g01030R | BraA01g01180R | BraA01g09180R | BraA01g10830R | BraA01g10910R | BraA01g12410R | BraA01g26010R | BraA01g26260R | BraA01g27380R | BraA01g28640R | BraA01g30290R | BraA01g31940R | BraA01g32450R | BraA01g32720R | BraA01g36000R | BraA02g04330R | BraA02g05100R | BraA02g05530R | BraA02g06150R | BraA02g06880R | BraA02g07220R | BraA02g07990R | BraA02g17680R | BraA02g20550R | BraA02g20980R |…
GO:0007155 - cell adhesion	3.18836e-05	0.00125643	4.27029	Over	12734	21	1420	10	BraA01g32220R | BraA02g35680R | BraA03g03360R | BraA03g18450R | BraA03g40890R | BraA04g24750R | BraA05g33540R | BraA06g38470R | BraA07g10550R | BraA10g28520R
GO:0022610 - biological adhesion	3.18836e-05	0.00125643	4.27029	Over	12734	21	1420	10	BraA01g32220R | BraA02g35680R | BraA03g03360R | BraA03g18450R | BraA03g40890R | BraA04g24750R | BraA05g33540R | BraA06g38470R | BraA07g10550R | BraA10g28520R
GO:0016310 - phosphorylation	3.28555e-05	0.00127315	0.656402	Under	12734	929	1420	68	BraA01g02990R | BraA01g13870R | BraA01g22470R | BraA01g22610R | BraA01g23580R | BraA01g30170R | BraA02g03560R | BraA02g07610R | BraA02g12610R | BraA02g24960R | BraA02g25760R | BraA03g01950R | BraA03g02180R | BraA03g04500R | BraA03g07640R | BraA03g08000R | BraA03g15920R | BraA03g16260R | BraA03g23590R | BraA03g39050R | BraA03g39660R | BraA03g42410R | BraA03g52740R | BraA04g03880R | BraA04g05190R |…
GO:0009642 - response to light intensity	3.43166e-05	0.00130797	2.09462	Over	12734	137	1420	32	BraA01g20950R | BraA01g21650R | BraA01g23770R | BraA01g35660R | BraA02g15690R | BraA02g18680R | BraA02g33240R | BraA02g46620R | BraA03g20570R | BraA03g22120R | BraA03g27690R | BraA03g39820R | BraA04g01870R | BraA04g27530R | BraA04g29350R | BraA04g30730R | BraA05g05790R | BraA05g23030R | BraA05g39830R | BraA06g06770R | BraA06g39930R | BraA07g16120R | BraA07g20320R | BraA07g23110R | BraA07g29530R |…
GO:0051171 - regulation of nitrogen compound metabolic process	3.79628e-05	0.0014236	1.26494	Over	12734	1666	1420	235	BraA01g01030R | BraA01g01180R | BraA01g09180R | BraA01g09740R | BraA01g10830R | BraA01g10910R | BraA01g12410R | BraA01g23770R | BraA01g26010R | BraA01g26260R | BraA01g27380R | BraA01g28640R | BraA01g30290R | BraA01g31940R | BraA01g32450R | BraA01g32720R | BraA01g36000R | BraA02g04330R | BraA02g05100R | BraA02g05530R | BraA02g06150R | BraA02g06880R | BraA02g07220R | BraA02g07990R | BraA02g17680R |…
GO:0051641 - cellular localization	4.81259e-05	0.00177608	0.599658	Under	12734	658	1420	44	BraA01g04230R | BraA01g10390R | BraA01g18810R | BraA02g02540R | BraA02g05150R | BraA02g06240R | BraA02g15460R | BraA02g22550R | BraA02g33820R | BraA02g39720R | BraA02g39730R | BraA03g13120R | BraA03g18150R | BraA03g18410R | BraA03g42770R | BraA03g48360R | BraA04g01190R | BraA04g15120R | BraA04g30920R | BraA06g17690R | BraA06g32610R | BraA06g38730R | BraA06g39040R | BraA06g39530R | BraA07g01960R |…
GO:2000112 - regulation of cellular macromolecule biosynthetic process	4.92919e-05	0.00179068	1.26312	Over	12734	1640	1420	231	BraA01g01030R | BraA01g01180R | BraA01g02360R | BraA01g09180R | BraA01g10830R | BraA01g10910R | BraA01g12410R | BraA01g26010R | BraA01g26260R | BraA01g27380R | BraA01g28640R | BraA01g30290R | BraA01g31940R | BraA01g32450R | BraA01g32720R | BraA01g36000R | BraA02g04330R | BraA02g05100R | BraA02g05530R | BraA02g06150R | BraA02g06880R | BraA02g07220R | BraA02g07990R | BraA02g17680R | BraA02g20550R |…
GO:0010556 - regulation of macromolecule biosynthetic process	5.56144e-05	0.00196478	1.26081	Over	12734	1643	1420	231	BraA01g01030R | BraA01g01180R | BraA01g02360R | BraA01g09180R | BraA01g10830R | BraA01g10910R | BraA01g12410R | BraA01g26010R | BraA01g26260R | BraA01g27380R | BraA01g28640R | BraA01g30290R | BraA01g31940R | BraA01g32450R | BraA01g32720R | BraA01g36000R | BraA02g04330R | BraA02g05100R | BraA02g05530R | BraA02g06150R | BraA02g06880R | BraA02g07220R | BraA02g07990R | BraA02g17680R | BraA02g20550R |…
GO:0009725 - response to hormone	5.60105e-05	0.00196478	1.29044	Over	12734	1369	1420	197	BraA01g02330R | BraA01g04230R | BraA01g06110R | BraA01g09740R | BraA01g10910R | BraA01g14010R | BraA01g16110R | BraA01g21650R | BraA01g26010R | BraA01g26730R | BraA01g27050R | BraA01g28800R | BraA01g30290R | BraA01g32390R | BraA01g32450R | BraA01g33370R | BraA02g05100R | BraA02g06810R | BraA02g06880R | BraA02g07990R | BraA02g14850R | BraA02g15910R | BraA02g16770R | BraA02g17680R | BraA02g19810R |…
GO:0071369 - cellular response to ethylene stimulus	5.66193e-05	0.00196478	1.974	Over	12734	159	1420	35	BraA01g28800R | BraA01g30290R | BraA02g05100R | BraA02g21280R | BraA02g42770R | BraA02g43990R | BraA03g02180R | BraA03g13410R | BraA03g36420R | BraA03g42390R | BraA03g60570R | BraA04g11970R | BraA04g30550R | BraA05g25360R | BraA06g08700R | BraA07g12540R | BraA07g15580R | BraA07g17630R | BraA07g18160R | BraA07g23250R | BraA07g27590R | BraA07g28110R | BraA07g35100R | BraA07g35950R | BraA08g21670R |…
GO:1901566 - organonitrogen compound biosynthetic process	5.98245e-05	0.00197844	1.49744	Over	12734	527	1420	88	BraA01g08720R | BraA01g09740R | BraA01g13820R | BraA01g14010R | BraA01g19870R | BraA01g23770R | BraA01g33430R | BraA02g03920R | BraA02g07600R | BraA02g08360R | BraA02g14720R | BraA02g23300R | BraA02g23850R | BraA02g25760R | BraA02g25770R | BraA02g31710R | BraA02g31960R | BraA02g34430R | BraA03g01950R | BraA03g04220R | BraA03g04270R | BraA03g04610R | BraA03g08570R | BraA03g09240R | BraA03g12010R |…
GO:0009767 - photosynthetic electron transport chain	5.98678e-05	0.00197844	2.69028	Over	12734	60	1420	18	BraA01g06390R | BraA01g20950R | BraA02g18680R | BraA02g46620R | BraA03g27690R | BraA03g28280R | BraA03g29400R | BraA03g49720R | BraA06g05920R | BraA07g16120R | BraA07g29530R | BraA07g31320R | BraA09g01720R | BraA09g03180R | BraA09g10250R | BraA09g16840R | BraA09g25650R | BraA09g62370R
GO:0043170 - macromolecule metabolic process	6.02186e-05	0.00197844	1.12371	Over	12734	4876	1420	611	BraA01g01030R | BraA01g01180R | BraA01g01730R | BraA01g02360R | BraA01g02990R | BraA01g04230R | BraA01g05190R | BraA01g06400R | BraA01g09180R | BraA01g09740R | BraA01g10340R | BraA01g10390R | BraA01g10830R | BraA01g10910R | BraA01g11460R | BraA01g11540R | BraA01g12410R | BraA01g12650R | BraA01g16110R | BraA01g16270R | BraA01g20080R | BraA01g21650R | BraA01g22470R | BraA01g22610R | BraA01g23580R |…
GO:0006955 - immune response	6.04168e-05	0.00197844	0.421297	Under	12734	298	1420	14	BraA01g26730R | BraA02g06810R | BraA02g10660R | BraA02g39290R | BraA03g36420R | BraA04g18820R | BraA06g26320R | BraA07g14980R | BraA07g20340R | BraA09g08990R | BraA09g43960R | BraA10g18000R | BraA10g22940R | BraA10g24010R
GO:0051252 - regulation of RNA metabolic process	6.76959e-05	0.00217681	1.26328	Over	12734	1583	1420	223	BraA01g01030R | BraA01g01180R | BraA01g09180R | BraA01g10830R | BraA01g10910R | BraA01g12410R | BraA01g26010R | BraA01g26260R | BraA01g27380R | BraA01g28640R | BraA01g30290R | BraA01g31940R | BraA01g32450R | BraA01g32720R | BraA01g36000R | BraA02g04330R | BraA02g05100R | BraA02g05530R | BraA02g06150R | BraA02g06880R | BraA02g07220R | BraA02g07990R | BraA02g17680R | BraA02g20550R | BraA02g20980R |…
GO:0009409 - response to cold	6.83472e-05	0.00217681	1.58801	Over	12734	384	1420	68	BraA01g04230R | BraA01g21650R | BraA01g23580R | BraA01g23770R | BraA01g32390R | BraA02g04330R | BraA02g06810R | BraA02g14720R | BraA02g24330R | BraA03g13840R | BraA03g18780R | BraA03g20570R | BraA03g20660R | BraA03g23980R | BraA03g23990R | BraA03g27130R | BraA03g27690R | BraA03g34200R | BraA03g34440R | BraA03g39630R | BraA03g39820R | BraA03g44860R | BraA03g48360R | BraA04g01850R | BraA04g01870R |…
GO:0006351 - transcription, DNA-templated	7.16716e-05	0.00225185	1.25822	Over	12734	1625	1420	228	BraA01g01030R | BraA01g01180R | BraA01g09180R | BraA01g10830R | BraA01g10910R | BraA01g12410R | BraA01g26010R | BraA01g26260R | BraA01g27380R | BraA01g28640R | BraA01g30290R | BraA01g31940R | BraA01g32450R | BraA01g32720R | BraA01g36000R | BraA02g04330R | BraA02g05100R | BraA02g05530R | BraA02g06150R | BraA02g06880R | BraA02g07220R | BraA02g07990R | BraA02g17680R | BraA02g20550R | BraA02g20980R |…
GO:0097659 - nucleic acid-templated transcription	7.45674e-05	0.00230195	1.25745	Over	12734	1626	1420	228	BraA01g01030R | BraA01g01180R | BraA01g09180R | BraA01g10830R | BraA01g10910R | BraA01g12410R | BraA01g26010R | BraA01g26260R | BraA01g27380R | BraA01g28640R | BraA01g30290R | BraA01g31940R | BraA01g32450R | BraA01g32720R | BraA01g36000R | BraA02g04330R | BraA02g05100R | BraA02g05530R | BraA02g06150R | BraA02g06880R | BraA02g07220R | BraA02g07990R | BraA02g17680R | BraA02g20550R | BraA02g20980R |…
GO:0006457 - protein folding	7.52466e-05	0.00230195	0.313866	Under	12734	200	1420	7	BraA01g01730R | BraA01g10390R | BraA01g34960R | BraA05g32230R | BraA06g26120R | BraA07g20000R | BraA10g20600R
GO:0032774 - RNA biosynthetic process	8.06886e-05	0.00243638	1.25591	Over	12734	1628	1420	228	BraA01g01030R | BraA01g01180R | BraA01g09180R | BraA01g10830R | BraA01g10910R | BraA01g12410R | BraA01g26010R | BraA01g26260R | BraA01g27380R | BraA01g28640R | BraA01g30290R | BraA01g31940R | BraA01g32450R | BraA01g32720R | BraA01g36000R | BraA02g04330R | BraA02g05100R | BraA02g05530R | BraA02g06150R | BraA02g06880R | BraA02g07220R | BraA02g07990R | BraA02g17680R | BraA02g20550R | BraA02g20980R |…
GO:0033036 - macromolecule localization	8.33699e-05	0.00246726	0.61891	Under	12734	681	1420	47	BraA01g10390R | BraA01g18810R | BraA01g26870R | BraA01g31740R | BraA02g02540R | BraA02g05150R | BraA02g15460R | BraA02g22550R | BraA03g01500R | BraA03g13120R | BraA03g13850R | BraA03g18150R | BraA03g23820R | BraA03g34830R | BraA03g37830R | BraA03g39830R | BraA03g42770R | BraA04g01190R | BraA04g30920R | BraA05g01650R | BraA05g19480R | BraA06g09530R | BraA06g17690R | BraA06g32610R | BraA06g38730R |…
GO:0032350 - regulation of hormone metabolic process	8.38339e-05	0.00246726	3.89896	Over	12734	23	1420	10	BraA02g07990R | BraA02g23850R | BraA03g22120R | BraA03g60130R | BraA04g29350R | BraA04g30730R | BraA05g05790R | BraA08g21180R | BraA10g21270R | BraA10g29120R
GO:0044260 - cellular macromolecule metabolic process	8.51013e-05	0.00247326	1.12864	Over	12734	4521	1420	569	BraA01g01030R | BraA01g01180R | BraA01g01730R | BraA01g02360R | BraA01g02990R | BraA01g04230R | BraA01g05190R | BraA01g06400R | BraA01g09180R | BraA01g10340R | BraA01g10390R | BraA01g10830R | BraA01g10910R | BraA01g11460R | BraA01g11540R | BraA01g12410R | BraA01g12650R | BraA01g16110R | BraA01g20080R | BraA01g21650R | BraA01g22470R | BraA01g22610R | BraA01g23580R | BraA01g24170R | BraA01g26010R |…
GO:0006396 - RNA processing	8.62136e-05	0.00247465	0.439589	Under	12734	306	1420	15	BraA01g05190R | BraA01g09180R | BraA01g20080R | BraA04g18820R | BraA04g21270R | BraA05g13950R | BraA06g17360R | BraA06g23630R | BraA07g19790R | BraA08g19910R | BraA09g17670R | BraA09g42730R | BraA10g03140R | BraA10g10620R | BraA10g19680R
GO:0009873 - ethylene-activated signaling pathway	9.22831e-05	0.00261656	1.97287	Over	12734	150	1420	33	BraA01g28800R | BraA01g30290R | BraA02g05100R | BraA02g21280R | BraA02g42770R | BraA02g43990R | BraA03g02180R | BraA03g36420R | BraA03g42390R | BraA03g60570R | BraA04g11970R | BraA04g30550R | BraA05g25360R | BraA06g08700R | BraA07g12540R | BraA07g15580R | BraA07g17630R | BraA07g18160R | BraA07g23250R | BraA07g27590R | BraA07g28110R | BraA07g35100R | BraA07g35950R | BraA08g21670R | BraA08g24810R |…
GO:0000226 - microtubule cytoskeleton organization	0.000109945	0.003043	2.50565	Over	12734	68	1420	19	BraA01g04230R | BraA02g14440R | BraA02g41720R | BraA02g45620R | BraA03g17940R | BraA03g19000R | BraA03g48360R | BraA05g09810R | BraA05g10720R | BraA06g01690R | BraA06g15010R | BraA08g27200R | BraA08g27370R | BraA09g03160R | BraA09g05800R | BraA09g09170R | BraA09g62970R | BraA10g06080R | BraA10g12510R
GO:0042128 - nitrate assimilation	0.00011125	0.003043	2.9892	Over	12734	42	1420	14	BraA01g07720R | BraA01g24480R | BraA02g07600R | BraA02g19360R | BraA02g20470R | BraA02g25320R | BraA03g50660R | BraA05g24150R | BraA07g05530R | BraA07g25340R | BraA07g32060R | BraA07g38940R | BraA09g11120R | BraA10g21750R
GO:0042126 - nitrate metabolic process	0.00011125	0.003043	2.9892	Over	12734	42	1420	14	BraA01g07720R | BraA01g24480R | BraA02g07600R | BraA02g19360R | BraA02g20470R | BraA02g25320R | BraA03g50660R | BraA05g24150R | BraA07g05530R | BraA07g25340R | BraA07g32060R | BraA07g38940R | BraA09g11120R | BraA10g21750R
GO:0032957 - inositol trisphosphate metabolic process	0.000118592	0.00320613	5.9784	Over	12734	9	1420	6	BraA01g02330R | BraA03g08000R | BraA03g47100R | BraA08g33810R | BraA10g04770R | BraA10g21580R
GO:0009719 - response to endogenous stimulus	0.000131789	0.00352196	1.26279	Over	12734	1470	1420	207	BraA01g02330R | BraA01g04230R | BraA01g06110R | BraA01g09740R | BraA01g10910R | BraA01g14010R | BraA01g16110R | BraA01g21650R | BraA01g26010R | BraA01g26170R | BraA01g26570R | BraA01g26730R | BraA01g27050R | BraA01g28800R | BraA01g30290R | BraA01g32390R | BraA01g32450R | BraA01g33370R | BraA02g05100R | BraA02g06810R | BraA02g06880R | BraA02g07990R | BraA02g14850R | BraA02g15910R | BraA02g16770R |…
GO:0045087 - innate immune response	0.000144971	0.00383021	0.438974	Under	12734	286	1420	14	BraA01g26730R | BraA02g06810R | BraA02g10660R | BraA02g39290R | BraA03g36420R | BraA04g18820R | BraA06g26320R | BraA07g14980R | BraA07g20340R | BraA09g08990R | BraA09g43960R | BraA10g18000R | BraA10g22940R | BraA10g24010R
GO:0006259 - DNA metabolic process	0.000146887	0.00383722	0.413889	Under	12734	260	1420	12	BraA01g06400R | BraA02g06150R | BraA03g06540R | BraA03g11710R | BraA04g18820R | BraA04g31730R | BraA05g01610R | BraA06g11870R | BraA08g08750R | BraA09g12650R | BraA09g30680R | BraA09g58080R
GO:0002376 - immune system process	0.000167446	0.0043257	0.483284	Under	12734	334	1420	18	BraA01g26730R | BraA02g06810R | BraA02g10660R | BraA02g39290R | BraA03g07640R | BraA03g22500R | BraA03g36420R | BraA04g18820R | BraA05g04670R | BraA06g26320R | BraA07g14980R | BraA07g20340R | BraA09g08990R | BraA09g43960R | BraA10g18000R | BraA10g22190R | BraA10g22940R | BraA10g24010R
GO:0016071 - mRNA metabolic process	0.000182544	0.00465725	0.404277	Under	12734	244	1420	11	BraA01g05190R | BraA01g24170R | BraA03g30080R | BraA05g11520R | BraA06g17360R | BraA06g23630R | BraA07g19790R | BraA09g42730R | BraA10g03140R | BraA10g10620R | BraA10g19680R
GO:0080090 - regulation of primary metabolic process	0.000184287	0.00465725	1.22554	Over	12734	1822	1420	249	BraA01g01030R | BraA01g01180R | BraA01g02360R | BraA01g09180R | BraA01g10830R | BraA01g10910R | BraA01g12410R | BraA01g26010R | BraA01g26260R | BraA01g27380R | BraA01g28640R | BraA01g30290R | BraA01g31940R | BraA01g32450R | BraA01g32720R | BraA01g35660R | BraA01g36000R | BraA02g04330R | BraA02g05100R | BraA02g05530R | BraA02g06150R | BraA02g06880R | BraA02g07220R | BraA02g07990R | BraA02g17680R |…
GO:0090056 - regulation of chlorophyll metabolic process	0.000194709	0.00486772	2.9892	Over	12734	39	1420	13	BraA01g09740R | BraA01g23770R | BraA02g31960R | BraA02g34430R | BraA03g12010R | BraA03g39820R | BraA03g52040R | BraA05g23030R | BraA06g39270R | BraA06g41080R | BraA07g01280R | BraA09g22500R | BraA09g53860R
GO:0046364 - monosaccharide biosynthetic process	0.000207257	0.00507302	2.54082	Over	12734	60	1420	17	BraA01g22550R | BraA02g41190R | BraA03g40230R | BraA03g51010R | BraA04g14830R | BraA04g14940R | BraA06g09690R | BraA06g32630R | BraA06g42390R | BraA06g42400R | BraA07g08970R | BraA07g20580R | BraA08g22160R | BraA08g29920R | BraA09g44740R | BraA09g53420R | BraA09g53530R
GO:0051276 - chromosome organization	0.000207284	0.00507302	0.446785	Under	12734	281	1420	14	BraA01g09180R | BraA02g06150R | BraA03g06540R | BraA03g12010R | BraA03g16100R | BraA03g23890R | BraA04g18820R | BraA04g31730R | BraA05g01610R | BraA05g14000R | BraA08g18220R | BraA08g19910R | BraA08g26980R | BraA09g12650R
GO:0019219 - regulation of nucleobase-containing compound metabolic process	0.000223991	0.0053507	1.23902	Over	12734	1614	1420	223	BraA01g01030R | BraA01g01180R | BraA01g09180R | BraA01g10830R | BraA01g10910R | BraA01g12410R | BraA01g26010R | BraA01g26260R | BraA01g27380R | BraA01g28640R | BraA01g30290R | BraA01g31940R | BraA01g32450R | BraA01g32720R | BraA01g36000R | BraA02g04330R | BraA02g05100R | BraA02g05530R | BraA02g06150R | BraA02g06880R | BraA02g07220R | BraA02g07990R | BraA02g17680R | BraA02g20550R | BraA02g20980R |…
GO:0010205 - photoinhibition	0.000225535	0.0053507	4.22005	Over	12734	17	1420	8	BraA02g18680R | BraA02g46620R | BraA03g27690R | BraA07g16120R | BraA07g29530R | BraA07g31320R | BraA09g10250R | BraA09g25650R
GO:0043155 - negative regulation of photosynthesis, light reaction	0.000225535	0.0053507	4.22005	Over	12734	17	1420	8	BraA02g18680R | BraA02g46620R | BraA03g27690R | BraA07g16120R | BraA07g29530R | BraA07g31320R | BraA09g10250R | BraA09g25650R
GO:0000160 - phosphorelay signal transduction system	0.000236882	0.00556315	1.79352	Over	12734	190	1420	38	BraA01g28800R | BraA01g30290R | BraA02g05100R | BraA02g21280R | BraA02g42770R | BraA02g43990R | BraA03g02180R | BraA03g36420R | BraA03g42390R | BraA03g60570R | BraA04g11970R | BraA04g30550R | BraA04g31570R | BraA05g01960R | BraA05g25360R | BraA06g08700R | BraA07g12540R | BraA07g15580R | BraA07g17630R | BraA07g18160R | BraA07g23250R | BraA07g26520R | BraA07g27590R | BraA07g28110R | BraA07g35100R |…
GO:0019319 - hexose biosynthetic process	0.000253125	0.00574982	3.07461	Over	12734	35	1420	12	BraA03g51010R | BraA04g14830R | BraA04g14940R | BraA06g09690R | BraA06g42390R | BraA06g42400R | BraA07g20580R | BraA08g22160R | BraA08g29920R | BraA09g44740R | BraA09g53420R | BraA09g53530R
GO:0034654 - nucleobase-containing compound biosynthetic process	0.000254695	0.00574982	1.2224	Over	12734	1790	1420	244	BraA01g01030R | BraA01g01180R | BraA01g09180R | BraA01g10830R | BraA01g10910R | BraA01g12410R | BraA01g26010R | BraA01g26260R | BraA01g27380R | BraA01g28640R | BraA01g30290R | BraA01g31940R | BraA01g32450R | BraA01g32720R | BraA01g36000R | BraA02g03920R | BraA02g04330R | BraA02g05100R | BraA02g05530R | BraA02g06150R | BraA02g06880R | BraA02g07030R | BraA02g07220R | BraA02g07990R | BraA02g17680R |…
GO:0071941 - nitrogen cycle metabolic process	0.000254723	0.00574982	2.78992	Over	12734	45	1420	14	BraA01g07720R | BraA01g24480R | BraA02g07600R | BraA02g19360R | BraA02g20470R | BraA02g25320R | BraA03g50660R | BraA05g24150R | BraA07g05530R | BraA07g25340R | BraA07g32060R | BraA07g38940R | BraA09g11120R | BraA10g21750R
GO:2001057 - reactive nitrogen species metabolic process	0.000254723	0.00574982	2.78992	Over	12734	45	1420	14	BraA01g07720R | BraA01g24480R | BraA02g07600R | BraA02g19360R | BraA02g20470R | BraA02g25320R | BraA03g50660R | BraA05g24150R | BraA07g05530R | BraA07g25340R | BraA07g32060R | BraA07g38940R | BraA09g11120R | BraA10g21750R
GO:0046835 - carbohydrate phosphorylation	0.000268432	0.00599596	5.38056	Over	12734	10	1420	6	BraA03g01950R | BraA03g08000R | BraA05g18690R | BraA06g03610R | BraA10g21580R | BraA10g30960R
GO:0032870 - cellular response to hormone stimulus	0.000270785	0.00599596	1.37297	Over	12734	725	1420	111	BraA01g02330R | BraA01g09740R | BraA01g14010R | BraA01g26010R | BraA01g27050R | BraA01g28800R | BraA01g30290R | BraA01g32390R | BraA01g33370R | BraA02g05100R | BraA02g06880R | BraA02g07990R | BraA02g15910R | BraA02g17680R | BraA02g19810R | BraA02g19820R | BraA02g20980R | BraA02g21280R | BraA02g23850R | BraA02g34390R | BraA02g41200R | BraA02g42770R | BraA02g43990R | BraA03g02180R | BraA03g13410R |…
GO:0010218 - response to far red light	0.000284393	0.00622544	2.56217	Over	12734	56	1420	16	BraA01g23770R | BraA03g23590R | BraA03g26800R | BraA03g39820R | BraA05g02360R | BraA05g23030R | BraA06g06770R | BraA06g29670R | BraA06g38370R | BraA07g20320R | BraA09g06770R | BraA09g06910R | BraA09g23110R | BraA09g27650R | BraA09g43900R | BraA09g61890R
GO:0006397 - mRNA processing	0.000286504	0.00622544	0.362328	Under	12734	198	1420	8	BraA01g05190R | BraA06g17360R | BraA06g23630R | BraA07g19790R | BraA09g42730R | BraA10g03140R | BraA10g10620R | BraA10g19680R
GO:0019222 - regulation of metabolic process	0.000296721	0.00638775	1.19822	Over	12734	2118	1420	283	BraA01g01030R | BraA01g01180R | BraA01g02360R | BraA01g09180R | BraA01g09740R | BraA01g10830R | BraA01g10910R | BraA01g12410R | BraA01g14010R | BraA01g23770R | BraA01g26010R | BraA01g26260R | BraA01g27380R | BraA01g28640R | BraA01g29510R | BraA01g30290R | BraA01g30550R | BraA01g31940R | BraA01g32450R | BraA01g32720R | BraA01g35660R | BraA01g36000R | BraA02g04330R | BraA02g05100R | BraA02g05530R |…
GO:0010114 - response to red light	0.000317234	0.00676668	2.27028	Over	12734	79	1420	20	BraA01g23770R | BraA02g20110R | BraA03g22120R | BraA03g23590R | BraA03g26800R | BraA03g39820R | BraA04g15150R | BraA04g29350R | BraA05g02360R | BraA05g23030R | BraA06g06770R | BraA06g29670R | BraA07g15690R | BraA07g20320R | BraA07g32860R | BraA09g06770R | BraA09g06910R | BraA09g27650R | BraA09g43900R | BraA09g61890R
GO:0040029 - regulation of gene expression, epigenetic	0.000338133	0.00714689	0.218722	Under	12734	123	1420	3	BraA04g18820R | BraA07g04420R | BraA10g10620R
GO:0010468 - regulation of gene expression	0.000353647	0.0073354	1.21714	Over	12734	1783	1420	242	BraA01g01030R | BraA01g01180R | BraA01g02360R | BraA01g09180R | BraA01g09740R | BraA01g10830R | BraA01g10910R | BraA01g12410R | BraA01g26010R | BraA01g26260R | BraA01g27380R | BraA01g28640R | BraA01g29510R | BraA01g30290R | BraA01g30550R | BraA01g31940R | BraA01g32450R | BraA01g32720R | BraA01g36000R | BraA02g04330R | BraA02g05100R | BraA02g05530R | BraA02g06150R | BraA02g06880R | BraA02g07220R |…
GO:0018298 - protein-chromophore linkage	0.000355022	0.0073354	2.51722	Over	12734	57	1420	16	BraA01g21650R | BraA02g34430R | BraA03g26800R | BraA04g01870R | BraA06g06770R | BraA06g39270R | BraA07g07590R | BraA07g20320R | BraA07g23110R | BraA08g22990R | BraA09g16580R | BraA09g22500R | BraA09g27650R | BraA09g33660R | BraA09g43900R | BraA09g61890R
GO:0006561 - proline biosynthetic process	0.000356516	0.0073354	4.4838	Over	12734	14	1420	7	BraA04g03880R | BraA04g04600R | BraA04g05190R | BraA04g05200R | BraA09g44600R | BraA09g45400R | BraA09g46320R
GO:0050896 - response to stimulus	0.00039004	0.00795476	1.1157	Over	12734	4485	1420	558	BraA01g02330R | BraA01g02360R | BraA01g02990R | BraA01g04230R | BraA01g06110R | BraA01g06400R | BraA01g07720R | BraA01g09740R | BraA01g10390R | BraA01g10910R | BraA01g14010R | BraA01g16110R | BraA01g19870R | BraA01g20950R | BraA01g21650R | BraA01g22140R | BraA01g22550R | BraA01g22610R | BraA01g23580R | BraA01g23770R | BraA01g24540R | BraA01g26010R | BraA01g26170R | BraA01g26260R | BraA01g26570R |…
GO:0071495 - cellular response to endogenous stimulus	0.000435011	0.00879479	1.35614	Over	12734	734	1420	111	BraA01g02330R | BraA01g09740R | BraA01g14010R | BraA01g26010R | BraA01g27050R | BraA01g28800R | BraA01g30290R | BraA01g32390R | BraA01g33370R | BraA02g05100R | BraA02g06880R | BraA02g07990R | BraA02g15910R | BraA02g17680R | BraA02g19810R | BraA02g19820R | BraA02g20980R | BraA02g21280R | BraA02g23850R | BraA02g34390R | BraA02g41200R | BraA02g42770R | BraA02g43990R | BraA03g02180R | BraA03g13410R |…
GO:0051193 - regulation of cofactor metabolic process	0.000444542	0.00891001	2.77569	Over	12734	42	1420	13	BraA01g09740R | BraA01g23770R | BraA02g31960R | BraA02g34430R | BraA03g12010R | BraA03g39820R | BraA03g52040R | BraA05g23030R | BraA06g39270R | BraA06g41080R | BraA07g01280R | BraA09g22500R | BraA09g53860R
GO:0009266 - response to temperature stimulus	0.000459238	0.00912588	1.41594	Over	12734	551	1420	87	BraA01g04230R | BraA01g10390R | BraA01g21650R | BraA01g23580R | BraA01g23770R | BraA01g32390R | BraA02g04330R | BraA02g06810R | BraA02g07000R | BraA02g14720R | BraA02g15690R | BraA02g24330R | BraA02g33290R | BraA03g10130R | BraA03g13840R | BraA03g18780R | BraA03g20570R | BraA03g20660R | BraA03g23980R | BraA03g23990R | BraA03g27130R | BraA03g27690R | BraA03g34200R | BraA03g34440R | BraA03g39630R |…
