# Supplementary material for: Expansion of the circadian transcriptome in Brassica rapa and genome-wide diversification of paralog expression patterns
Source: eLife. 2020 Sep 30;9:e58993. doi: 10.7554/eLife.58993 (PMC7655105; doi:10.7554/eLife.58993)
Supplement: Supplementary file 5. — Predicted target groups from GRNs were compared between Arabidopsis (At) and B. rapa (Br) networks. Sets of 3 genes containing one At Transcription factor (TF) and its two Br orthologs (denoted B. rapa 1 and B. rapa 2) were defined. 256 of these TF sets were found between the At and Br GRNs. Tab ‘GRN_Comparison_Orthologs’ reports results after testing for orthology between predicted target groups of corresponding At and Br TFs. Column 1 (Gene Accessions) denotes the three accessions for TFs in each set. For simplicity, B. rapa 1 was always made to be the Br TF with the most significant overlap in target genes with the At TF. Columns 2, 3, and 4 are the total number of genes in the predicted target groups for At, Br1, and Br2, respectively. Columns 5 and 6 are the number of overlapping genes with the At targets (based on orthology) for Br1 and Br2, respectively. Columns 7 and 8 are the p-values for the significance of overlap with At targets for Br1 and Br2, respectively. Column 9 is the p-value result of a permutation test performed to determine if Br1 is significantly more At-like than Br2. This p-value is meaningless unless Column 7 is also significant. Tab: GRN_Comparison_CNSs reports results after testing for conserved non-coding sequences (CNSs) near genes in predicted target groups of corresponding At and Br TFs. Column 1 (Gene Accessions) denotes the three accessions for TFs in each set. For simplicity, B. rapa 1 was always made to be the Br TF with the most significant overlap in target gene CNSs with the At TF. Columns 2, 3, and 4 are the total number of CNSs associated with genes in the predicted target groups for At, Br1, and Br2, respectively. Columns 5 and 6 are the number of overlapping CNSs with the At targets for Br1 and Br2, respectively. Columns 7 and 8 are the p-values for the significance of CNS overlap with At for Br1 and Br2, respectively. Column 9 is the p-value result of a permutation test performed to determine if Br1 is significantly more A [file elife-58993-supp5.xlsx]

## Sheet: GRN_Comparison_Orthologs
Gene Accessions (A. thaliana _ B. rapa 1 _ B. rapa 2)	Number of total A. thaliana targets	Number of total B. rapa 1 targets	Number of total B. rapa 2 targets	Number overlapping targets between A. thaliana and B. rapa 1	Number overlapping targets between A. thaliana and B. rapa 2	Significance (P-value) of overlapping targets between A. thaliana and B. rapa 1	Significance (P-value) of overlapping targets between A. thaliana and B. rapa 2	Significance (P-value) of B. rapa 1 being more A. thaliana-like than B. rapa 2	B. rapa 1 is significantly more A. thaliana-like than B. rapa 2
AT1G04400_BraA08g34230R_BraA10g03560R	136	1030	1081	21	8	0.0137494	0.998435	0.0028	TRUE
AT1G09570_BraA06g06770R_BraA09g61890R	377	827	774	63	45	0.000168509	0.590075	0.0001	TRUE
AT1G09770_BraA06g06950R_BraA08g31860R	244	284	161	4	2	0.76701	0.842181	0.291	FALSE
AT1G13450_BraA06g09680R_BraA09g59870R	236	307	291	13	9	0.196269	0.802003	0.1279	FALSE
AT1G14440_BraA06g10410R_BraA09g59090R	25	272	166	1	0	0.899677	0.997761	< 1.00E-04	FALSE
AT1G19220_BraA06g14510R_BraA08g27590R	60	916	547	6	0	0.144674	0.997083	< 1.00E-04	FALSE
AT1G19850_BraA06g15050R_BraA07g15080R	329	197	304	10	8	0.170402	0.973689	0.0473	FALSE
AT1G22070_BraA09g39200R_BraA08g26260R	322	938	655	66	25	0.000129269	0.996654	0.0001	TRUE
AT1G22640_BraA07g13710R_BraA09g38770R	111	62	59	0	0	1	1	< 1.00E-04	FALSE
AT1G24625_BraA07g12270R_BraA08g24580R	72	612	149	5	1	0.799853	0.88366	0.2737	FALSE
AT1G25560_BraA09g36480R_BraA08g24880R	347	615	946	34	46	0.18175	0.368939	0.2755	FALSE
AT1G28420_BraA08g23530R_BraA09g34600R	15	446	369	3	1	0.577505	0.965072	0.0914	FALSE
AT1G30210_BraA08g22860R_BraA09g33430R	195	122	241	2	3	0.749288	0.89412	0.2146	FALSE
AT1G32240_BraA09g31360R_BraA05g22310R	36	301	402	1	0	0.807733	0.999236	< 1.00E-04	FALSE
AT1G33240_BraA08g08750R_BraA09g30680R	619	476	1144	45	84	0.0462199	0.288383	0.1043	FALSE
AT1G49480_BraA05g19140R_BraA08g04440R	192	1084	629	14	3	0.127228	0.984352	0.0244	FALSE
AT1G49950_BraA05g18940R_BraA06g03940R	55	43	29	0	0	1	1	< 1.00E-04	FALSE
AT1G51700_BraA08g03170R_BraA05g17940R	79	307	549	3	2	0.419297	0.980244	0.0589	FALSE
AT1G52150_BraA08g02960R_BraA06g02620R	89	587	661	6	4	0.225807	0.882696	0.0966	FALSE
AT1G58110_BraA09g17990R_BraA01g19530R	127	540	485	5	3	0.557518	0.896777	0.1823	FALSE
AT1G61660_BraA09g16520R_BraA01g21850R	386	290	640	8	14	0.462691	0.779658	0.2867	FALSE
AT1G68130_BraA07g29270R_BraA07g31650R	155	323	68	6	1	0.78628	0.889072	0.2612	FALSE
AT1G68520_BraA02g19290R_BraA07g29080R	336	192	304	3	4	0.715471	0.841951	0.2665	FALSE
AT1G68810_BraA07g32240R_BraA07g28900R	46	128	48	2	0	0.769622	0.993467	< 1.00E-04	FALSE
AT1G70000_BraA02g20550R_BraA07g28460R	299	308	106	4	1	0.769647	0.90735	0.2229	FALSE
AT1G71130_BraA02g21280R_BraA07g28110R	86	651	79	4	0	0.816902	0.989021	< 1.00E-04	FALSE
AT1G77920_BraA07g39070R_BraA07g25270R	443	779	570	16	9	0.191179	0.79743	0.129	FALSE
AT1G78600_BraA02g25770R_BraA07g25060R	450	695	303	31	10	0.247107	0.879908	0.1577	FALSE
AT2G23760_BraA09g52010R_BraA04g16800R	164	241	577	4	2	0.131502	0.998186	0.0086	FALSE
AT2G25930_BraA09g50820R_BraA04g18480R	153	404	408	16	4	0.0114762	0.99925	0.0009	TRUE
AT2G28200_BraA04g19630R_BraA07g17240R	150	683	1424	41	54	0.000148597	0.0123484	0.0028	TRUE
AT2G28550_BraA07g17630R_BraA03g24270R	27	1024	1058	3	3	0.779802	0.803715	0.3308	FALSE
AT2G31370_BraA05g13480R_BraA04g22040R	126	72	910	1	7	0.788835	0.971383	0.1131	FALSE
AT2G33860_BraA04g23590R_BraA05g11230R	77	281	159	1	0	0.911006	0.997684	< 1.00E-04	FALSE
AT2G34710_BraA04g24030R_BraA05g10530R	137	435	1179	8	9	0.0702346	0.980754	0.0314	FALSE
AT2G36960_BraA04g25510R_BraA05g08910R	131	235	191	2	1	0.776151	0.942096	0.1671	FALSE
AT2G37630_BraA03g19290R_BraA05g08380R	168	193	752	8	19	0.234619	0.918222	0.1245	FALSE
AT2G38880_BraA03g20220R_BraA05g07400R	128	25	161	1	3	0.787165	0.986509	0.0837	FALSE
AT2G40140_BraA05g06490R_BraA03g20960R	193	649	279	14	6	0.17968	0.618426	0.1023	FALSE
AT2G41900_BraA04g28790R_BraA03g21750R	193	1193	380	14	2	0.18313	0.955472	0.0736	FALSE
AT2G42280_BraA05g03630R_BraA04g28980R	104	356	192	2	0	0.668015	0.994281	< 1.00E-04	FALSE
AT2G44680_BraA05g05270R_BraA03g22930R	40	100	312	1	1	0.792755	0.993413	0.0592	FALSE
AT2G46340_BraA05g02360R_BraA03g23590R	118	823	1046	31	35	0.0741097	0.171353	0.2362	FALSE
AT2G46790_BraA04g31570R_BraA05g01960R	298	912	114	62	6	0.0119652	0.83707	0.001	TRUE
AT3G01140_BraA01g36230R_BraA05g38040R	29	118	80	0	0	1	1	< 1.00E-04	FALSE
AT3G02380_BraA03g30460R_BraA01g36000R	338	786	1318	113	136	2.12271e-09	4.7322e-05	< 1.00E-04	TRUE
AT3G06590_BraA01g33920R_BraA05g35890R	264	382	815	8	10	0.215415	0.905429	0.1188	FALSE
AT3G10760_BraA01g32720R_BraA05g34320R	271	768	814	15	15	0.354995	0.477733	0.3784	FALSE
AT3G11100_BraA05g34040R_BraA01g32540R	148	265	183	8	1	0.123626	0.994348	0.0067	FALSE
AT3G11280_BraA01g32450R_BraA05g33900R	142	818	381	9	3	0.541173	0.874264	0.2061	FALSE
AT3G11540_BraA05g33680R_BraA03g34360R	310	123	50	6	1	0.490772	0.955376	0.0892	FALSE
AT3G16870_BraA03g37260R_BraA01g27970R	30	1016	49	6	0	0.920963	0.993307	< 1.00E-04	FALSE
AT3G18380_BraA01g26820R_BraA05g27700R	51	669	31	0	0	1	1	< 1.00E-04	FALSE
AT3G18990_BraA01g26350R_BraA03g38100R	378	779	422	21	12	0.386292	0.497274	0.397	FALSE
AT3G19510_BraA01g26090R_BraA05g26420R	13	451	128	0	0	1	1	< 1.00E-04	FALSE
AT3G21175_BraA01g24860R_BraA05g24570R	133	121	109	1	0	0.851447	0.998465	< 1.00E-04	FALSE
AT3G23210_BraA07g09780R_BraA01g23310R	107	855	139	14	0	0.229106	0.989011	< 1.00E-04	FALSE
AT3G23690_BraA01g22670R_BraA07g09210R	284	908	735	26	20	0.3244	0.546151	0.3441	FALSE
AT3G24120_BraA01g22400R_BraA03g40280R	34	638	27	3	0	0.994044	0.999437	< 1.00E-04	FALSE
AT3G24520_BraA07g08250R_BraA03g40590R	151	78	24	1	0	0.965648	0.998244	< 1.00E-04	FALSE
AT3G25710_BraA06g36900R_BraA02g37620R	384	161	356	6	10	0.47152	0.81629	0.2577	FALSE
AT3G25890_BraA06g36750R_BraA02g37690R	108	315	683	3	5	0.649754	0.866693	0.2264	FALSE
AT3G51120_BraA03g44540R_BraA09g40580R	39	523	311	1	0	0.900681	0.997753	< 1.00E-04	FALSE
AT3G57480_BraA09g46250R_BraA07g21300R	72	113	54	2	0	0.698884	0.993498	< 1.00E-04	FALSE
AT3G58120_BraA09g46690R_BraA07g21700R	484	1192	1480	72	65	7.627e-05	0.492051	< 1.00E-04	TRUE
AT3G60530_BraA09g48310R_BraA07g22710R	211	100	66	2	1	0.829787	0.921708	0.2161	FALSE
AT3G61830_BraA09g49370R_BraA04g01730R	77	314	616	3	4	0.619035	0.902463	0.1846	FALSE
AT3G62420_BraA07g23640R_BraA09g49860R	155	350	357	2	2	0.827816	0.844408	0.3066	FALSE
AT4G00730_BraA09g01470R_BraA03g29610R	337	721	412	13	6	0.439061	0.808685	0.2699	FALSE
AT4G04890_BraA03g27980R_BraA09g25200R	197	393	427	6	6	0.672051	0.766625	0.3353	FALSE
AT4G17230_BraA01g12300R_BraA08g12330R	344	550	844	30	21	0.00401623	0.998995	0.0022	TRUE
AT4G17570_BraA08g12610R_BraA01g01920R	29	298	370	0	0	1	1	< 1.00E-04	FALSE
AT4G17810_BraA01g02140R_BraA03g46960R	393	554	298	16	8	0.52901	0.718248	0.3651	FALSE
AT4G18020_BraA01g02340R_BraA03g47110R	30	130	60	1	0	0.923314	0.997661	< 1.00E-04	FALSE
AT4G18390_BraA03g47370R_BraA01g02590R	43	780	562	6	1	0.136139	0.989914	0.0193	FALSE
AT4G20380_BraA01g04360R_BraA03g48410R	235	200	176	3	1	0.557646	0.970725	0.0783	FALSE
AT4G23980_BraA01g07690R_BraA03g50630R	334	156	71	3	1	0.794809	0.915383	0.2144	FALSE
AT4G24020_BraA03g50660R_BraA01g07720R	372	592	770	24	25	0.222777	0.775209	0.1696	FALSE
AT4G24470_BraA03g50910R_BraA01g08210R	16	22	139	0	0	1	1	< 1.00E-04	FALSE
AT4G31550_BraA08g17390R_BraA03g55960R	200	518	225	5	2	0.638976	0.819725	0.3319	FALSE
AT4G34590_BraA08g15920R_BraA03g58040R	128	93	61	2	0	0.612787	0.995716	< 1.00E-04	FALSE
AT4G34680_BraA08g15850R_BraA03g58100R	258	33	42	1	0	0.814129	0.999132	< 1.00E-04	FALSE
AT4G38620_BraA06g42580R_BraA08g22370R	118	732	131	17	1	0.312257	0.96448	0.051	FALSE
AT5G02810_BraA02g01670R_BraA10g31240R	357	1189	1184	120	106	8.58059e-06	0.0327048	< 1.00E-04	TRUE
AT5G10030_BraA10g26350R_BraA02g04330R	65	431	565	1	1	0.890085	0.94694	0.1884	FALSE
AT5G11060_BraA02g04820R_BraA03g05360R	51	1236	1432	14	13	0.11381	0.479442	0.0663	FALSE
AT5G12850_BraA02g05530R_BraA10g24410R	37	479	326	1	0	0.886959	0.997899	< 1.00E-04	FALSE
AT5G16600_BraA10g21730R_BraA02g07630R	304	917	68	19	0	0.386863	0.982919	< 1.00E-04	FALSE
AT5G24590_BraA09g06740R_BraA06g30050R	524	131	392	10	6	0.00172046	0.999979	< 1.00E-04	TRUE
AT5G24930_BraA06g30460R_BraA09g06670R	109	1568	432	32	2	0.00684164	0.996313	0.0007	TRUE
AT5G25220_BraA02g42740R_BraA06g30690R	34	704	634	2	0	0.523449	0.997186	< 1.00E-04	FALSE
AT5G28300_BraA06g32450R_BraA02g41330R	78	277	641	3	4	0.542501	0.937032	0.135	FALSE
AT5G28770_BraA06g32620R_BraA02g41200R	1024	954	637	129	84	0.103447	0.434343	0.1554	FALSE
AT5G29000_BraA09g05300R_BraA02g41180R	201	173	87	5	2	0.704815	0.861156	0.2578	FALSE
AT5G39660_BraA07g18470R_BraA04g12840R	177	630	1186	41	53	0.00426342	0.355217	0.0066	TRUE
AT5G44190_BraA06g41080R_BraA02g31960R	159	1118	1181	59	34	0.000194749	0.99598	0.0002	TRUE
AT5G46690_BraA06g39630R_BraA09g22110R	158	1243	102	17	1	0.719394	0.88497	0.2487	FALSE
AT5G46760_BraA06g39570R_BraA09g22150R	25	698	309	1	0	0.934636	0.997705	< 1.00E-04	FALSE
AT5G47370_BraA09g22650R_BraA06g39110R	402	23	360	1	13	0.829709	0.914346	0.196	FALSE
AT5G52660_BraA03g14750R_BraA10g10230R	22	856	177	1	0	0.987655	0.999145	< 1.00E-04	FALSE
AT5G58900_BraA03g11650R_BraA10g15890R	108	932	207	10	2	0.737021	0.806647	0.3412	FALSE
AT5G61380_BraA03g42600R_BraA09g07570R	251	1550	1496	100	88	1.47591e-06	0.00554781	< 1.00E-04	TRUE
AT5G62430_BraA02g44540R_BraA06g24450R	209	908	450	70	40	6.25267e-05	0.0441022	0.0001	TRUE
AT5G62940_BraA09g08200R_BraA06g25010R	51	129	44	0	0	1	1	< 1.00E-04	FALSE
AT5G65310_BraA02g45960R_BraA06g27060R	224	966	418	21	7	0.422793	0.84944	0.2079	FALSE
AT1G06040_BraA08g33580R_BraA09g63490R	308	883	1078	86	76	0.000112278	0.735384	< 1.00E-04	TRUE
AT1G14685_BraA08g29490R_BraA09g58920R	178	474	335	21	11	0.149489	0.839704	0.1022	FALSE
AT1G28050_BraA08g23980R_BraA07g11510R	196	1317	1346	76	61	0.000126268	0.440725	< 1.00E-04	TRUE
AT1G29160_BraA07g07120R_BraA08g23340R	192	45	45	0	0	1	1	< 1.00E-04	FALSE
AT1G35460_BraA05g21180R_BraA08g08390R	57	232	1320	1	2	0.762223	0.994503	0.0599	FALSE
AT1G69690_BraA07g28600R_BraA02g20350R	44	27	70	1	0	0.734208	0.999934	< 1.00E-04	FALSE
AT1G78080_BraA07g25230R_BraA02g25440R	381	182	379	9	11	0.22895	0.956704	0.0747	FALSE
AT1G79430_BraA02g26260R_BraA07g24740R	807	787	446	63	28	0.0439656	0.870532	0.0285	TRUE
AT2G02070_BraA02g36240R_BraA09g23350R	216	622	326	16	4	0.125711	0.967269	0.0505	FALSE
AT2G18300_BraA06g28190R_BraA09g12100R	350	529	914	49	63	0.00460205	0.179636	0.0123	TRUE
AT2G30590_BraA03g16090R_BraA04g21180R	488	726	680	27	22	0.239779	0.652564	0.1977	FALSE
AT2G35940_BraA03g18560R_BraA04g24850R	209	653	808	16	5	0.00597892	0.999672	0.0007	TRUE
AT2G40080_BraA03g20890R_BraA04g27180R	159	1105	755	45	13	0.00227488	0.999063	0.0005	TRUE
AT2G41940_BraA04g28820R_BraA03g21760R	264	895	76	14	1	0.791764	0.871342	0.2938	FALSE
AT2G44940_BraA04g30550R_BraA03g23010R	843	80	39	3	1	0.771821	0.923127	0.1927	FALSE
AT2G46870_BraA04g31620R_BraA03g23730R	98	486	64	1	0	0.997266	0.999766	< 1.00E-04	FALSE
AT3G02830_BraA03g30710R_BraA01g35590R	245	1035	951	71	53	6.25852e-05	0.361595	< 1.00E-04	TRUE
AT3G13810_BraA01g30640R_BraA03g35710R	254	850	544	21	14	0.423923	0.478518	0.4389	FALSE
AT3G14230_BraA03g35920R_BraA01g30290R	58	1334	272	5	1	0.855653	0.865316	0.3291	FALSE
AT3G15030_BraA01g29340R_BraA03g36300R	234	1217	1075	18	11	0.199713	0.892349	0.1259	FALSE
AT3G17609_BraA01g27380R_BraA03g37510R	423	1188	1233	130	126	0.00278959	0.0562663	0.0364	TRUE
AT3G19580_BraA01g26010R_BraA03g38470R	140	89	65	0	0	1	1	< 1.00E-04	FALSE
AT3G22380_BraA01g24090R_BraA03g39640R	214	1023	884	30	24	0.0514412	0.316088	0.0671	FALSE
AT3G28910_BraA02g39290R_BraA09g04260R	777	530	192	34	10	0.406381	0.824539	0.2296	FALSE
AT3G54810_BraA07g20280R_BraA04g05880R	162	606	892	11	11	0.170493	0.755752	0.1107	FALSE
AT3G56400_BraA07g20790R_BraA04g04660R	219	692	628	14	10	0.235472	0.760964	0.1582	FALSE
AT3G57800_BraA04g03700R_BraA07g21490R	802	198	308	19	18	0.105106	0.974474	0.0382	FALSE
AT4G14540_BraA03g36770R_BraA01g28640R	571	454	649	18	20	0.29703	0.852776	0.1886	FALSE
AT4G26640_BraA03g52290R_BraA08g19670R	18	47	492	0	0	1	1	< 1.00E-04	FALSE
AT5G02030_BraA03g01450R_BraA02g01440R	84	32	517	1	0	0.596655	1	< 1.00E-04	FALSE
AT5G12840_BraA03g06080R_BraA02g05520R	125	144	58	2	0	0.751514	0.993018	< 1.00E-04	FALSE
AT5G15310_BraA03g07320R_BraA02g06970R	109	654	490	8	2	0.138156	0.980725	0.036	FALSE
AT5G15830_BraA02g07220R_BraA03g07580R	30	202	30	0	0	1	1	< 1.00E-04	FALSE
AT5G17300_BraA02g07990R_BraA03g08240R	260	815	691	46	19	0.000405011	0.997073	0.0001	TRUE
AT5G24470_BraA02g43100R_BraA09g06770R	325	1260	934	121	44	4.98469e-08	0.999987	< 1.00E-04	TRUE
AT5G56860_BraA02g13720R_BraA03g12750R	677	190	564	16	33	0.17037	0.89151	0.1168	FALSE
AT5G59780_BraA03g11230R_BraA02g11720R	234	624	141	14	3	0.715023	0.755528	0.3757	FALSE
AT5G60200_BraA02g11440R_BraA03g11020R	109	31	26	1	0	0.864703	0.998232	< 1.00E-04	FALSE
AT5G60850_BraA02g43710R_BraA09g07400R	238	392	479	6	3	0.254972	0.977961	0.0472	FALSE
AT5G61420_BraA02g44060R_BraA09g07610R	82	505	419	5	0	0.122811	0.998472	< 1.00E-04	FALSE
AT5G62000_BraA09g07780R_BraA02g44200R	279	585	779	20	19	0.204294	0.90808	0.125	FALSE
AT5G62470_BraA09g07970R_BraA02g44570R	110	758	1338	5	7	0.573314	0.846319	0.2283	FALSE
AT5G65210_BraA09g09310R_BraA02g45900R	221	136	95	2	1	0.817672	0.92569	0.2044	FALSE
AT5G65410_BraA02g46050R_BraA09g09390R	198	110	87	5	3	0.632647	0.865949	0.2313	FALSE
AT5G67420_BraA09g09700R_BraA02g46320R	24	911	594	2	0	0.617138	0.995074	< 1.00E-04	FALSE
AT1G06040_BraA10g05180R_BraA09g63490R	308	1107	1078	103	76	4.50469e-07	0.516504	< 1.00E-04	TRUE
AT1G14685_BraA09g58920R_BraA06g10670R	178	335	317	11	9	0.452218	0.727373	0.3138	FALSE
AT1G28050_BraA08g23980R_BraA09g35070R	196	1317	892	76	27	4.45308e-07	0.997302	< 1.00E-04	TRUE
AT1G29160_BraA09g34270R_BraA08g23340R	192	22	45	0	0	1	1	< 1.00E-04	FALSE
AT1G35460_BraA08g08390R_BraA09g29190R	57	1320	21	2	0	1	1	< 1.00E-04	FALSE
AT1G53170_BraA06g01860R_BraA08g02510R	44	103	67	0	0	1	1	< 1.00E-04	FALSE
AT1G69690_BraA07g28600R_BraA07g33010R	44	27	184	1	2	0.750717	0.997166	0.0454	FALSE
AT1G73730_BraA07g35950R_BraA07g27020R	57	162	59	1	0	0.949287	0.997874	< 1.00E-04	FALSE
AT1G75540_BraA07g37330R_BraA07g26150R	80	117	577	2	5	0.575617	0.966966	0.0996	FALSE
AT1G78080_BraA07g25230R_BraA07g39200R	381	182	330	9	5	0.042052	0.997948	0.0059	TRUE
AT1G79430_BraA07g40160R_BraA07g24740R	807	341	446	22	28	0.463223	0.471098	0.461	FALSE
AT2G02070_BraA06g38000R_BraA09g23350R	216	628	326	26	4	0.0112957	0.997594	0.0019	TRUE
AT2G02080_BraA09g23360R_BraA06g37990R	64	389	287	4	1	0.315192	0.976873	0.0608	FALSE
AT2G18300_BraA09g12100R_BraA07g03150R	350	914	1042	63	59	0.00394185	0.321136	0.0053	TRUE
AT2G30590_BraA05g14010R_BraA04g21180R	488	272	680	9	22	0.63031	0.68107	0.3817	FALSE
AT2G35940_BraA05g09730R_BraA04g24850R	209	685	808	12	5	0.0578667	0.994701	0.0102	FALSE
AT2G40080_BraA05g06590R_BraA04g27180R	159	637	755	24	13	0.006955	0.993709	0.0031	TRUE
AT2G41940_BraA05g03460R_BraA04g28820R	264	347	895	10	14	0.135755	0.962873	0.0658	FALSE
AT2G44940_BraA04g30550R_BraA05g05520R	843	80	23	3	0	0.680894	0.990646	< 1.00E-04	FALSE
AT2G45660_BraA04g30920R_BraA05g05970R	19	955	262	3	0	0.693683	0.989417	< 1.00E-04	FALSE
AT2G46870_BraA05g01920R_BraA04g31620R	98	91	486	1	1	0.729999	0.999456	0.0248	FALSE
AT3G02830_BraA03g30710R_BraA05g39760R	245	1035	1038	71	48	1.56457e-05	0.861499	< 1.00E-04	TRUE
AT3G13810_BraA05g31580R_BraA03g35710R	254	707	544	19	14	0.596707	0.681348	0.3925	FALSE
AT3G14230_BraA05g31160R_BraA03g35920R	58	147	1334	2	5	0.344387	0.98651	0.0836	FALSE
AT3G15030_BraA05g30520R_BraA03g36300R	234	1013	1075	16	11	0.113554	0.88861	0.0709	FALSE
AT3G17609_BraA05g28490R_BraA03g37510R	423	1566	1233	167	126	1.65785e-06	0.0266128	0.0001	TRUE
AT3G19580_BraA05g26300R_BraA03g38470R	140	62	65	0	0	1	1	< 1.00E-04	FALSE
AT3G22380_BraA03g39640R_BraA05g23420R	214	884	1409	24	31	0.125855	0.406311	0.1674	FALSE
AT3G28910_BraA06g34680R_BraA09g04260R	777	738	192	59	10	0.162479	0.944798	0.0703	FALSE
AT3G54810_BraA07g20280R_BraA09g43790R	162	606	512	11	3	0.0665842	0.989972	0.017	FALSE
AT3G56400_BraA07g20790R_BraA09g45260R	219	692	965	14	12	0.10965	0.892143	0.0708	FALSE
AT3G57800_BraA09g46490R_BraA07g21490R	802	318	308	26	18	0.178508	0.918644	0.1078	FALSE
AT4G02590_BraA03g28640R_BraA09g02670R	342	157	581	6	14	0.331016	0.889742	0.1722	FALSE
AT4G14540_BraA05g29690R_BraA03g36770R	571	331	454	20	18	0.0698606	0.869019	0.0486	FALSE
AT4G26640_BraA01g10230R_BraA08g19670R	18	177	492	0	0	1	1	< 1.00E-04	FALSE
AT5G02030_BraA03g01450R_BraA10g31790R	84	32	347	1	2	0.703208	0.999892	0.0167	FALSE
AT5G08190_BraA03g04230R_BraA10g27280R	51	170	98	3	0	0.450327	0.994223	< 1.00E-04	FALSE
AT5G08330_BraA03g04320R_BraA10g27160R	357	1012	104	64	4	0.286024	0.919765	0.1117	FALSE
AT5G12840_BraA03g06080R_BraA10g24420R	125	144	359	2	4	0.746867	0.872248	0.2369	FALSE
AT5G15310_BraA03g07320R_BraA10g22670R	109	654	518	8	2	0.180065	0.986088	0.0237	FALSE
AT5G15830_BraA10g22300R_BraA03g07580R	30	57	30	0	0	1	1	< 1.00E-04	FALSE
AT5G17300_BraA10g21270R_BraA03g08240R	260	1531	691	97	19	9.91082e-07	0.999867	< 1.00E-04	TRUE
AT5G24470_BraA06g29990R_BraA09g06770R	325	1047	934	73	44	0.000107056	0.930793	0.0001	TRUE
AT5G56860_BraA10g14020R_BraA03g12750R	677	551	564	42	33	0.0543786	0.829045	0.0433	FALSE
AT5G59780_BraA10g16680R_BraA03g11230R	234	225	624	8	14	0.22622	0.720144	0.1452	FALSE
AT5G60200_BraA10g17000R_BraA03g11020R	109	79	26	1	0	0.960847	0.998113	< 1.00E-04	FALSE
AT5G60850_BraA03g42930R_BraA09g07400R	238	432	479	6	3	0.313082	0.966708	0.0653	FALSE
AT5G61420_BraA03g42560R_BraA09g07610R	82	1032	419	3	0	0.564435	0.991023	< 1.00E-04	FALSE
AT5G62000_BraA09g07780R_BraA06g24020R	279	585	318	20	12	0.428632	0.452294	0.4512	FALSE
AT5G62470_BraA06g24510R_BraA09g07970R	110	364	758	3	5	0.673653	0.857879	0.2357	FALSE
AT5G65210_BraA06g26940R_BraA09g09310R	221	197	136	5	2	0.542458	0.925199	0.1479	FALSE
AT5G65410_BraA09g09390R_BraA06g27140R	198	87	362	3	12	0.726726	0.765991	0.3219	FALSE
AT5G67420_BraA09g09700R_BraA07g15350R	24	911	809	2	1	0.687048	0.959547	0.1549	FALSE
AT1G06040_BraA10g05180R_BraA08g33580R	308	1107	883	103	86	5.36664e-06	0.000615241	0.0053	TRUE
AT1G14685_BraA08g29490R_BraA06g10670R	178	474	317	21	9	0.0164738	0.899524	0.0038	TRUE
AT1G28050_BraA07g11510R_BraA09g35070R	196	1346	892	61	27	5.42883e-05	0.935945	< 1.00E-04	TRUE
AT1G29160_BraA09g34270R_BraA07g07120R	192	22	45	0	0	1	1	< 1.00E-04	FALSE
AT1G35460_BraA05g21180R_BraA09g29190R	57	232	21	1	0	0.999606	0.999961	< 1.00E-04	FALSE
AT1G69690_BraA07g33010R_BraA02g20350R	44	184	70	2	0	0.762898	0.993364	< 1.00E-04	FALSE
AT1G69780_BraA07g33440R_BraA02g20430R	120	130	166	2	2	0.782478	0.896003	0.2267	FALSE
AT1G78080_BraA02g25440R_BraA07g39200R	381	379	330	11	5	0.230836	0.959863	0.0629	FALSE
AT1G79430_BraA02g26260R_BraA07g40160R	807	787	341	63	22	0.040933	0.84732	0.0264	TRUE
AT2G02070_BraA06g38000R_BraA02g36240R	216	628	622	26	16	0.0310505	0.935383	0.0195	TRUE
AT2G03340_BraA06g37470R_BraA02g36920R	30	895	199	1	0	0.984983	0.999004	< 1.00E-04	FALSE
AT2G18300_BraA06g28190R_BraA07g03150R	350	529	1042	49	59	3.21121e-05	0.17176	< 1.00E-04	TRUE
AT2G30590_BraA03g16090R_BraA05g14010R	488	726	272	27	9	0.445935	0.750685	0.3212	FALSE
AT2G35940_BraA03g18560R_BraA05g09730R	209	653	685	16	12	0.195822	0.858139	0.131	FALSE
AT2G38090_BraA05g07970R_BraA03g19670R	395	609	579	16	11	0.171617	0.826446	0.1144	FALSE
AT2G40080_BraA03g20890R_BraA05g06590R	159	1105	637	45	24	0.198772	0.635282	0.1794	FALSE
AT2G41940_BraA05g03460R_BraA03g21760R	264	347	76	10	1	0.502741	0.944183	0.1081	FALSE
AT2G44940_BraA03g23010R_BraA05g05520R	843	39	23	1	0	0.906402	0.99771	< 1.00E-04	FALSE
AT2G46870_BraA05g01920R_BraA03g23730R	98	91	64	1	0	0.887777	0.997888	< 1.00E-04	FALSE
AT3G02830_BraA01g35590R_BraA05g39760R	245	951	1038	53	48	0.000557212	0.127766	0.0014	TRUE
AT3G13810_BraA05g31580R_BraA01g30640R	254	707	850	19	21	0.49462	0.693455	0.3672	FALSE
AT3G14230_BraA05g31160R_BraA01g30290R	58	147	272	2	1	0.520507	0.991074	0.0427	FALSE
AT3G15030_BraA05g30520R_BraA01g29340R	234	1013	1217	16	18	0.374044	0.464749	0.4106	FALSE
AT3G16770_BraA05g29040R_BraA01g28100R	55	489	701	2	0	0.393737	0.999213	< 1.00E-04	FALSE
AT3G17609_BraA05g28490R_BraA01g27380R	423	1566	1188	167	130	1.10811e-10	9.09095e-05	< 1.00E-04	TRUE
AT3G19580_BraA05g26300R_BraA01g26010R	140	62	89	0	0	1	1	< 1.00E-04	FALSE
AT3G22380_BraA01g24090R_BraA05g23420R	214	1023	1409	30	31	0.0229966	0.460047	0.0279	TRUE
AT3G26744_BraA06g36240R_BraA02g38130R	218	1156	999	22	18	0.245069	0.472738	0.2877	FALSE
AT3G28910_BraA06g34680R_BraA02g39290R	777	738	530	59	34	0.114993	0.880246	0.0905	FALSE
AT3G54810_BraA04g05880R_BraA09g43790R	162	892	512	11	3	0.187033	0.955501	0.0733	FALSE
AT3G56400_BraA04g04660R_BraA09g45260R	219	628	965	10	12	0.320136	0.674839	0.2249	FALSE
AT3G57800_BraA04g03700R_BraA09g46490R	802	198	318	19	26	0.325346	0.664145	0.2603	FALSE
AT4G14540_BraA05g29690R_BraA01g28640R	571	331	649	20	20	0.0217225	0.991106	0.013	TRUE
AT4G26640_BraA01g10230R_BraA03g52290R	18	177	47	0	0	1	1	< 1.00E-04	FALSE
AT4G29190_BraA01g01030R_BraA03g54010R	308	761	538	35	16	0.00184536	0.912119	0.0004	TRUE
AT5G02030_BraA10g31790R_BraA02g01440R	84	347	517	2	0	0.387082	0.999232	< 1.00E-04	FALSE
AT5G05410_BraA10g29320R_BraA02g02680R	227	342	948	9	15	0.181844	0.857488	0.1157	FALSE
AT5G12840_BraA10g24420R_BraA02g05520R	125	359	58	4	0	0.738975	0.987983	< 1.00E-04	FALSE
AT5G15160_BraA02g06880R_BraA10g22850R	76	299	494	2	1	0.562275	0.986909	0.0545	FALSE
AT5G15310_BraA02g06970R_BraA10g22670R	109	490	518	2	2	0.827303	0.853145	0.2939	FALSE
AT5G15830_BraA10g22300R_BraA02g07220R	30	57	202	0	0	1	1	< 1.00E-04	FALSE
AT5G17300_BraA10g21270R_BraA02g07990R	260	1531	815	97	46	3.58383e-07	0.462762	< 1.00E-04	TRUE
AT5G24470_BraA02g43100R_BraA06g29990R	325	1260	1047	121	73	1.74677e-08	0.837271	< 1.00E-04	TRUE
AT5G56860_BraA02g13720R_BraA10g14020R	677	190	551	16	42	0.458931	0.561375	0.4072	FALSE
AT5G59780_BraA10g16680R_BraA02g11720R	234	225	141	8	3	0.442034	0.920636	0.1355	FALSE
AT5G60200_BraA02g11440R_BraA10g17000R	109	31	79	1	1	0.811947	0.988321	0.0781	FALSE
AT5G60850_BraA02g43710R_BraA03g42930R	238	392	432	6	6	0.61617	0.734078	0.3748	FALSE
AT5G61420_BraA02g44060R_BraA03g42560R	82	505	1032	5	3	0.148359	0.994656	0.018	FALSE
AT5G62000_BraA06g24020R_BraA02g44200R	279	318	779	12	19	0.206056	0.947482	0.0831	FALSE
AT5G62470_BraA06g24510R_BraA02g44570R	110	364	1338	3	7	0.51484	0.72285	0.2922	FALSE
AT5G65210_BraA06g26940R_BraA02g45900R	221	197	95	5	1	0.517711	0.954841	0.0942	FALSE
AT5G65410_BraA02g46050R_BraA06g27140R	198	110	362	5	12	0.480424	0.807655	0.2721	FALSE
AT5G67420_BraA07g15350R_BraA02g46320R	24	809	594	1	0	0.878957	0.998007	< 1.00E-04	FALSE

## Sheet: GRN_Comparison_CNSs
Gene Accessions (A. thaliana _ B. rapa 1 _ B. rapa 2)	Number of total CNSs detected in A. thaliana targets	Number of total CNSs detected in B. rapa 1 targets	Number of total CNSs detected in B. rapa 2 targets	Number overlapping CNSs between A. thaliana and B. rapa 1	Number overlapping CNSs between A. thaliana and B. rapa 2	Significance (P-value) of overlapping CNSs between A. thaliana and B. rapa 1	Significance (P-value) of overlapping CNSs between A. thaliana and B. rapa 2	Significance (P-value) of B. rapa 1 being more A. thaliana-like than B. rapa 2	B. rapa 1 is significantly more A. thaliana-like than B. rapa 2
AT1G04400_BraA08g34230R_BraA10g03560R	181	1115	1085	14	2	0.0066305	0.999754	0.0007	TRUE
AT1G09570_BraA06g06770R_BraA09g61890R	563	1061	1018	58	43	4.20895e-06	0.293224	< 1.00E-04	TRUE
AT1G09770_BraA06g06950R_BraA08g31860R	621	291	141	7	0	0.151749	0.996027	< 1.00E-04	FALSE
AT1G13450_BraA09g59870R_BraA06g09680R	428	368	260	11	8	0.589617	0.606308	0.4465	FALSE
AT1G14440_BraA09g59090R_BraA06g10410R	41	236	317	0	0	1	1	< 1.00E-04	FALSE
AT1G19220_BraA06g14510R_BraA08g27590R	186	1304	674	23	0	0.00130993	0.99995	< 1.00E-04	TRUE
AT1G19850_BraA06g15050R_BraA07g15080R	566	292	354	24	6	0.000198306	0.999991	0.0001	TRUE
AT1G22070_BraA09g39200R_BraA08g26260R	550	996	601	45	6	8.09716e-06	0.999986	< 1.00E-04	TRUE
AT1G22640_BraA07g13710R_BraA09g38770R	246	42	68	0	0	1	1	< 1.00E-04	FALSE
AT1G24625_BraA07g12270R_BraA08g24580R	128	671	125	17	0	0.131176	0.993099	< 1.00E-04	FALSE
AT1G25560_BraA09g36480R_BraA08g24880R	608	910	1101	38	40	0.120219	0.44207	0.1588	FALSE
AT1G28420_BraA08g23530R_BraA09g34600R	23	676	490	4	0	0.243622	0.996766	< 1.00E-04	FALSE
AT1G30210_BraA09g33430R_BraA08g22860R	284	268	92	6	0	0.306678	0.99143	< 1.00E-04	FALSE
AT1G32240_BraA05g22310R_BraA09g31360R	59	467	321	0	0	1	1	< 1.00E-04	FALSE
AT1G33240_BraA08g08750R_BraA09g30680R	1202	745	1237	78	92	0.000306929	0.513967	0.0001	TRUE
AT1G49480_BraA05g19140R_BraA08g04440R	468	1038	744	18	10	0.392496	0.851893	0.1996	FALSE
AT1G49950_BraA05g18940R_BraA06g03940R	132	25	25	0	0	1	1	< 1.00E-04	FALSE
AT1G51700_BraA08g03170R_BraA05g17940R	103	422	681	3	0	0.158935	0.999633	< 1.00E-04	FALSE
AT1G52150_BraA08g02960R_BraA06g02620R	158	682	756	14	6	0.00629582	0.988788	0.0011	TRUE
AT1G58110_BraA09g17990R_BraA01g19530R	211	530	602	2	1	0.681251	0.965711	0.1075	FALSE
AT1G61660_BraA09g16520R_BraA01g21850R	945	335	590	13	16	0.279907	0.914325	0.1217	FALSE
AT1G68130_BraA07g29270R_BraA07g31650R	389	395	59	15	2	0.716871	0.811314	0.3309	FALSE
AT1G68520_BraA02g19290R_BraA07g29080R	489	224	323	11	5	0.0379981	0.997476	0.0056	TRUE
AT1G68810_BraA07g28900R_BraA07g32240R	85	54	146	0	0	1	1	< 1.00E-04	FALSE
AT1G70000_BraA02g20550R_BraA07g28460R	417	300	110	2	0	0.775066	0.992809	< 1.00E-04	FALSE
AT1G71130_BraA02g21280R_BraA07g28110R	83	693	101	1	0	0.994542	0.999567	< 1.00E-04	FALSE
AT1G77920_BraA07g25270R_BraA07g39070R	760	539	675	18	19	0.205975	0.513451	0.2134	FALSE
AT1G78600_BraA02g25770R_BraA07g25060R	699	861	311	41	2	0.00140811	0.999891	< 1.00E-04	TRUE
AT2G23760_BraA09g52010R_BraA04g16800R	288	261	649	4	0	0.0189233	0.999992	< 1.00E-04	TRUE
AT2G25930_BraA04g18480R_BraA09g50820R	329	511	548	9	7	0.442985	0.874153	0.1859	FALSE
AT2G28200_BraA04g19630R_BraA07g17240R	199	767	1589	34	42	0.000199372	0.0578231	0.0012	TRUE
AT2G28550_BraA07g17630R_BraA03g24270R	47	1162	1321	2	1	0.680879	0.967173	0.1041	FALSE
AT2G31370_BraA05g13480R_BraA04g22040R	254	77	973	1	7	0.788964	0.971363	0.1131	FALSE
AT2G33860_BraA04g23590R_BraA05g11230R	119	337	231	0	0	1	1	< 1.00E-04	FALSE
AT2G34710_BraA04g24030R_BraA05g10530R	204	549	1351	6	2	0.0113195	0.999877	0.0013	TRUE
AT2G36960_BraA04g25510R_BraA05g08910R	274	350	157	5	0	0.294471	0.993132	< 1.00E-04	FALSE
AT2G37630_BraA03g19290R_BraA05g08380R	348	233	809	6	20	0.649147	0.7137	0.3607	FALSE
AT2G38880_BraA05g07400R_BraA03g20220R	258	203	19	2	0	0.98062	0.998339	< 1.00E-04	FALSE
AT2G40140_BraA03g20960R_BraA05g06490R	336	280	539	12	10	0.0145908	0.955484	0.0078	TRUE
AT2G41900_BraA03g21750R_BraA04g28790R	379	298	1322	2	4	0.53339	0.938099	0.1733	FALSE
AT2G42280_BraA04g28980R_BraA05g03630R	230	241	426	2	2	0.608323	0.939762	0.1347	FALSE
AT2G44680_BraA03g22930R_BraA05g05270R	38	305	106	0	0	1	1	< 1.00E-04	FALSE
AT2G46340_BraA05g02360R_BraA03g23590R	240	1049	1220	19	20	0.0838296	0.137624	0.2825	FALSE
AT2G46790_BraA04g31570R_BraA05g01960R	490	1091	142	48	3	0.0239078	0.957144	0.0036	TRUE
AT3G01140_BraA01g36230R_BraA05g38040R	44	153	99	0	0	1	1	< 1.00E-04	FALSE
AT3G02380_BraA03g30460R_BraA01g36000R	439	916	1485	82	88	2.50183e-09	0.00185783	< 1.00E-04	TRUE
AT3G06590_BraA05g35890R_BraA01g33920R	579	892	370	21	1	0.00755607	0.998957	0.0006	TRUE
AT3G10760_BraA01g32720R_BraA05g34320R	474	844	839	31	19	0.00501399	0.919739	0.0026	TRUE
AT3G11100_BraA01g32540R_BraA05g34040R	248	217	315	0	0	1	1	< 1.00E-04	FALSE
AT3G11280_BraA01g32450R_BraA05g33900R	224	882	478	8	1	0.207323	0.986474	0.0188	FALSE
AT3G11540_BraA05g33680R_BraA03g34360R	698	158	82	7	3	0.65439	0.831952	0.2752	FALSE
AT3G16870_BraA03g37260R_BraA01g27970R	54	572	42	2	0	0.990961	0.999157	< 1.00E-04	FALSE
AT3G18380_BraA01g26820R_BraA05g27700R	143	871	40	0	0	1	1	< 1.00E-04	FALSE
AT3G18990_BraA03g38100R_BraA01g26350R	1038	644	932	26	14	0.000138337	0.998746	< 1.00E-04	TRUE
AT3G19510_BraA01g26090R_BraA05g26420R	30	340	137	0	0	1	1	< 1.00E-04	FALSE
AT3G21175_BraA01g24860R_BraA05g24570R	281	123	112	2	0	0.520287	0.997244	< 1.00E-04	FALSE
AT3G23210_BraA01g23310R_BraA07g09780R	116	129	898	1	6	0.840388	0.89865	0.2185	FALSE
AT3G23690_BraA07g09210R_BraA01g22670R	580	660	931	16	17	0.248122	0.805371	0.1797	FALSE
AT3G24120_BraA01g22400R_BraA03g40280R	61	728	33	3	0	0.993136	0.999329	< 1.00E-04	FALSE
AT3G24520_BraA07g08250R_BraA03g40590R	292	74	31	2	0	0.74534	0.99368	< 1.00E-04	FALSE
AT3G25710_BraA02g37620R_BraA06g36900R	688	480	176	26	10	0.454781	0.571092	0.4095	FALSE
AT3G25890_BraA02g37690R_BraA06g36750R	150	682	311	7	0	0.162606	0.995504	< 1.00E-04	FALSE
AT3G51120_BraA03g44540R_BraA09g40580R	65	701	481	0	0	1	1	< 1.00E-04	FALSE
AT3G57480_BraA07g21300R_BraA09g46250R	103	78	104	0	0	1	1	< 1.00E-04	FALSE
AT3G58120_BraA09g46690R_BraA07g21700R	857	1516	1752	74	69	0.000296031	0.185175	0.0008	TRUE
AT3G60530_BraA09g48310R_BraA07g22710R	369	162	72	4	0	0.40309	0.992755	< 1.00E-04	FALSE
AT3G61830_BraA04g01730R_BraA09g49370R	114	678	261	5	0	0.345052	0.991434	< 1.00E-04	FALSE
AT3G62420_BraA07g23640R_BraA09g49860R	224	417	449	0	0	1	1	< 1.00E-04	FALSE
AT4G00730_BraA09g01470R_BraA03g29610R	719	834	540	19	3	0.00255797	0.998264	0.0002	TRUE
AT4G04890_BraA09g25200R_BraA03g27980R	231	529	547	2	2	0.810564	0.824651	0.3598	FALSE
AT4G17230_BraA08g12330R_BraA01g12300R	604	953	646	30	13	0.142714	0.954896	0.0564	FALSE
AT4G17570_BraA08g12610R_BraA01g01920R	34	278	500	0	0	1	1	< 1.00E-04	FALSE
AT4G17810_BraA01g02140R_BraA03g46960R	668	657	436	34	12	0.00788196	0.98483	0.0038	TRUE
AT4G18020_BraA01g02340R_BraA03g47110R	57	139	68	2	0	0.693513	0.993817	< 1.00E-04	FALSE
AT4G18390_BraA03g47370R_BraA01g02590R	67	972	665	5	0	0.167939	0.99738	< 1.00E-04	FALSE
AT4G20380_BraA01g04360R_BraA03g48410R	470	208	178	6	1	0.174253	0.993613	0.0124	FALSE
AT4G23980_BraA03g50630R_BraA01g07690R	606	85	140	2	0	0.361929	0.99948	< 1.00E-04	FALSE
AT4G24020_BraA03g50660R_BraA01g07720R	607	811	1144	22	13	0.000564342	0.990031	0.0003	TRUE
AT4G24470_BraA03g50910R_BraA01g08210R	31	10	167	0	0	1	1	< 1.00E-04	FALSE
AT4G31550_BraA03g55960R_BraA08g17390R	381	213	513	1	2	0.868088	0.923427	0.2071	FALSE
AT4G34590_BraA08g15920R_BraA03g58040R	167	60	61	0	0	1	1	< 1.00E-04	FALSE
AT4G34680_BraA08g15850R_BraA03g58100R	459	46	44	5	0	0.0940784	0.999138	< 1.00E-04	FALSE
AT4G38620_BraA06g42580R_BraA08g22370R	194	874	121	10	0	0.412431	0.983373	< 1.00E-04	FALSE
AT5G02810_BraA10g31240R_BraA02g01670R	572	1493	1441	99	96	7.45245e-06	2.83651e-05	0.1344	FALSE
AT5G10030_BraA10g26350R_BraA02g04330R	133	543	671	2	1	0.657302	0.97306	0.0898	FALSE
AT5G11060_BraA03g05360R_BraA02g04820R	81	1464	1325	6	5	0.478539	0.660069	0.3045	FALSE
AT5G12850_BraA02g05530R_BraA10g24410R	97	641	400	1	0	0.896326	0.997793	< 1.00E-04	FALSE
AT5G16600_BraA10g21730R_BraA02g07630R	465	970	95	33	0	0.115486	0.992609	< 1.00E-04	FALSE
AT5G24590_BraA09g06740R_BraA06g30050R	1390	113	459	7	7	0.0145034	0.999797	0.0021	TRUE
AT5G24930_BraA06g30460R_BraA09g06670R	229	1763	466	36	5	0.0154794	0.959611	0.0037	TRUE
AT5G25220_BraA02g42740R_BraA06g30690R	87	720	564	2	1	0.787712	0.936594	0.1792	FALSE
AT5G28300_BraA06g32450R_BraA02g41330R	136	378	903	6	13	0.624329	0.759533	0.3145	FALSE
AT5G28770_BraA02g41200R_BraA06g32620R	1594	891	1128	115	135	0.0774285	0.274572	0.1895	FALSE
AT5G29000_BraA02g41180R_BraA09g05300R	385	121	258	5	4	0.20501	0.988284	0.032	FALSE
AT5G39660_BraA07g18470R_BraA04g12840R	243	610	1323	27	39	0.0110581	0.164565	0.0349	TRUE
AT5G44190_BraA06g41080R_BraA02g31960R	211	1352	1337	49	37	0.0165909	0.778895	0.0115	TRUE
AT5G46690_BraA09g22110R_BraA06g39630R	228	107	1402	1	9	0.807113	0.948447	0.1478	FALSE
AT5G46760_BraA09g22150R_BraA06g39570R	52	311	758	0	0	1	1	< 1.00E-04	FALSE
AT5G47370_BraA09g22650R_BraA06g39110R	852	31	440	4	16	0.0585661	0.999683	0.0071	FALSE
AT5G52660_BraA03g14750R_BraA10g10230R	8	981	196	1	0	0.986728	0.999095	< 1.00E-04	FALSE
AT5G58900_BraA10g15890R_BraA03g11650R	221	250	1060	5	16	0.49614	0.871777	0.191	FALSE
AT5G61380_BraA03g42600R_BraA09g07570R	427	1736	1709	78	56	3.03037e-08	0.394803	< 1.00E-04	TRUE
AT5G62430_BraA02g44540R_BraA06g24450R	359	997	548	42	28	0.00564536	0.0408882	0.0448	TRUE
AT5G62940_BraA09g08200R_BraA06g25010R	75	115	65	0	0	1	1	< 1.00E-04	FALSE
AT5G65310_BraA02g45960R_BraA06g27060R	389	1034	529	14	6	0.460951	0.788165	0.2928	FALSE
AT1G06040_BraA08g33580R_BraA09g63490R	512	1084	1147	64	63	0.0361866	0.156563	0.1383	FALSE
AT1G14685_BraA08g29490R_BraA09g58920R	280	640	413	16	2	0.0231599	0.998502	0.0016	TRUE
AT1G28050_BraA08g23980R_BraA07g11510R	282	1451	1542	52	38	0.000665593	0.821188	0.0005	TRUE
AT1G29160_BraA07g07120R_BraA08g23340R	379	61	44	0	0	1	1	< 1.00E-04	FALSE
AT1G35460_BraA05g21180R_BraA08g08390R	109	287	1446	2	2	0.318344	0.999273	0.0156	FALSE
AT1G69690_BraA07g28600R_BraA02g20350R	68	33	81	1	0	0.741836	0.999904	< 1.00E-04	FALSE
AT1G78080_BraA07g25230R_BraA02g25440R	647	205	525	14	11	0.00342617	0.999846	0.0009	TRUE
AT1G79430_BraA02g26260R_BraA07g24740R	1293	947	488	38	19	0.368816	0.603314	0.3553	FALSE
AT2G02070_BraA09g23350R_BraA02g36240R	455	518	866	8	12	0.588565	0.756618	0.3121	FALSE
AT2G18300_BraA06g28190R_BraA09g12100R	520	709	1137	68	67	3.6235e-07	0.46546	< 1.00E-04	TRUE
AT2G30590_BraA04g21180R_BraA03g16090R	1178	651	662	31	25	0.0913124	0.718657	0.0673	FALSE
AT2G35940_BraA03g18560R_BraA04g24850R	345	683	930	10	2	0.0101906	0.999761	0.0005	TRUE
AT2G40080_BraA03g20890R_BraA04g27180R	158	1341	947	23	6	0.0116369	0.995837	0.0028	TRUE
AT2G41940_BraA04g28820R_BraA03g21760R	426	1058	110	17	0	0.305245	0.98484	< 1.00E-04	FALSE
AT2G44940_BraA04g30550R_BraA03g23010R	1159	67	51	2	1	0.794022	0.937668	0.1758	FALSE
AT2G46870_BraA03g23730R_BraA04g31620R	110	81	682	0	0	1	1	< 1.00E-04	FALSE
AT3G02830_BraA01g35590R_BraA03g30710R	499	1086	1186	73	66	0.00062199	0.213032	0.001	TRUE
AT3G13810_BraA01g30640R_BraA03g35710R	651	974	438	48	12	0.00407291	0.982352	0.0015	TRUE
AT3G14230_BraA03g35920R_BraA01g30290R	80	1608	361	4	0	0.629228	0.98735	< 1.00E-04	FALSE
AT3G15030_BraA01g29340R_BraA03g36300R	363	1407	1310	11	5	0.150433	0.966127	0.0547	FALSE
AT3G17609_BraA03g37510R_BraA01g27380R	648	1295	1352	67	62	0.00331502	0.129215	0.0151	TRUE
AT3G19580_BraA01g26010R_BraA03g38470R	158	104	60	0	0	1	1	< 1.00E-04	FALSE
AT3G22380_BraA01g24090R_BraA03g39640R	556	1357	1216	43	38	0.0117137	0.0617036	0.1038	FALSE
AT3G28910_BraA09g04260R_BraA02g39290R	1189	211	633	12	23	0.171452	0.903385	0.1071	FALSE
AT3G54810_BraA07g20280R_BraA04g05880R	411	757	1052	7	7	0.347189	0.763704	0.2158	FALSE
AT3G56400_BraA04g04660R_BraA07g20790R	358	644	653	14	8	0.0900091	0.942708	0.0475	FALSE
AT3G57800_BraA04g03700R_BraA07g21490R	1432	289	395	27	19	0.0175608	0.995113	0.008	TRUE
AT4G14540_BraA03g36770R_BraA01g28640R	848	405	733	12	19	0.464083	0.675951	0.3535	FALSE
AT4G26640_BraA03g52290R_BraA08g19670R	35	63	597	0	0	1	1	< 1.00E-04	FALSE
AT5G02030_BraA02g01440R_BraA03g01450R	183	542	43	0	0	1	1	< 1.00E-04	FALSE
AT5G12840_BraA02g05520R_BraA03g06080R	163	48	191	0	0	1	1	< 1.00E-04	FALSE
AT5G15310_BraA03g07320R_BraA02g06970R	153	942	579	9	1	0.0614513	0.99405	0.008	FALSE
AT5G15830_BraA02g07220R_BraA03g07580R	37	208	38	0	0	1	1	< 1.00E-04	FALSE
AT5G17300_BraA02g07990R_BraA03g08240R	379	968	814	36	7	1.03511e-05	0.999987	< 1.00E-04	TRUE
AT5G24470_BraA02g43100R_BraA09g06770R	473	1409	1186	59	30	0.00462572	0.990754	0.0035	TRUE
AT5G56860_BraA03g12750R_BraA02g13720R	1085	712	256	37	10	0.24573	0.875763	0.1634	FALSE
AT5G59780_BraA02g11720R_BraA03g11230R	379	164	680	4	7	0.25414	0.985596	0.0466	FALSE
AT5G60200_BraA02g11440R_BraA03g11020R	147	33	18	0	0	1	1	< 1.00E-04	FALSE
AT5G60850_BraA09g07400R_BraA02g43710R	356	585	492	3	2	0.734591	0.876902	0.2418	FALSE
AT5G61420_BraA02g44060R_BraA09g07610R	113	637	421	1	0	0.891095	0.997849	< 1.00E-04	FALSE
AT5G62000_BraA09g07780R_BraA02g44200R	470	644	881	12	11	0.226713	0.885222	0.1379	FALSE
AT5G62470_BraA09g07970R_BraA02g44570R	242	787	1359	7	10	0.549925	0.81131	0.2603	FALSE
AT5G65210_BraA02g45900R_BraA09g09310R	329	104	162	1	0	0.790205	0.99949	< 1.00E-04	FALSE
AT5G65410_BraA02g46050R_BraA09g09390R	381	95	66	7	4	0.632788	0.825763	0.2688	FALSE
AT5G67420_BraA09g09700R_BraA02g46320R	44	1040	850	2	0	0.552927	0.996698	< 1.00E-04	FALSE
AT1G06040_BraA10g05180R_BraA09g63490R	512	1248	1147	72	63	0.000253758	0.0194197	0.0057	TRUE
AT1G14685_BraA06g10670R_BraA09g58920R	280	416	413	7	2	0.161246	0.99047	0.02	FALSE
AT1G28050_BraA08g23980R_BraA09g35070R	282	1451	1029	52	17	2.79239e-05	0.998166	< 1.00E-04	TRUE
AT1G29160_BraA09g34270R_BraA08g23340R	379	9	44	0	0	1	1	< 1.00E-04	FALSE
AT1G35460_BraA08g08390R_BraA09g29190R	109	1446	29	2	0	0.999999	1	< 1.00E-04	FALSE
AT1G53170_BraA06g01860R_BraA08g02510R	57	131	103	0	0	1	1	< 1.00E-04	FALSE
AT1G69690_BraA07g28600R_BraA07g33010R	68	33	236	1	1	0.705118	0.999916	0.0141	FALSE
AT1G73730_BraA07g35950R_BraA07g27020R	74	206	59	0	0	1	1	< 1.00E-04	FALSE
AT1G75540_BraA07g26150R_BraA07g37330R	124	588	128	8	1	0.636609	0.918168	0.1692	FALSE
AT1G78080_BraA07g25230R_BraA07g39200R	647	205	413	14	3	6.51303e-05	0.999999	< 1.00E-04	TRUE
AT1G79430_BraA07g40160R_BraA07g24740R	1293	471	488	22	19	0.208307	0.678336	0.1612	FALSE
AT2G02070_BraA06g38000R_BraA09g23350R	455	781	518	28	8	0.0209266	0.994583	0.0071	TRUE
AT2G02080_BraA06g37990R_BraA09g23360R	105	305	561	5	6	0.266312	0.5144	0.1319	FALSE
AT2G18300_BraA09g12100R_BraA07g03150R	520	1137	1208	67	66	0.00589206	0.045831	0.0673	FALSE
AT2G30590_BraA04g21180R_BraA05g14010R	1178	651	258	31	6	0.0993357	0.978512	0.0273	FALSE
AT2G35940_BraA05g09730R_BraA04g24850R	345	859	930	12	2	0.0107229	0.999629	0.0003	TRUE
AT2G40080_BraA05g06590R_BraA04g27180R	158	706	947	11	6	0.0518643	0.986205	0.0187	FALSE
AT2G41940_BraA04g28820R_BraA05g03460R	426	1058	380	17	0	0.0256439	0.998886	< 1.00E-04	TRUE
AT2G44940_BraA04g30550R_BraA05g05520R	1159	67	16	2	0	0.866935	0.994166	< 1.00E-04	FALSE
AT2G45660_BraA04g30920R_BraA05g05970R	34	914	328	2	0	0.769559	0.993113	< 1.00E-04	FALSE
AT2G46870_BraA05g01920R_BraA04g31620R	110	122	682	0	0	1	1	< 1.00E-04	FALSE
AT3G02830_BraA05g39760R_BraA03g30710R	499	1352	1186	73	66	0.0353148	0.0428906	0.4387	FALSE
AT3G13810_BraA03g35710R_BraA05g31580R	651	438	840	12	15	0.242698	0.935491	0.0975	FALSE
AT3G14230_BraA05g31160R_BraA03g35920R	80	161	1608	1	4	0.762402	0.991259	0.0692	FALSE
AT3G15030_BraA05g30520R_BraA03g36300R	363	1253	1310	18	5	0.00065833	0.999377	0.0002	TRUE
AT3G17609_BraA05g28490R_BraA03g37510R	648	1800	1295	95	67	2.56095e-05	0.0592328	0.0002	TRUE
AT3G19580_BraA05g26300R_BraA03g38470R	158	55	60	0	0	1	1	< 1.00E-04	FALSE
AT3G22380_BraA05g23420R_BraA03g39640R	556	1698	1216	54	38	0.0208617	0.238119	0.0474	TRUE
AT3G28910_BraA06g34680R_BraA09g04260R	1189	780	211	42	12	0.532611	0.559701	0.4592	FALSE
AT3G54810_BraA07g20280R_BraA09g43790R	411	757	502	7	2	0.339131	0.962323	0.0687	FALSE
AT3G56400_BraA09g45260R_BraA07g20790R	358	902	653	13	8	0.473325	0.774531	0.3048	FALSE
AT3G57800_BraA09g46490R_BraA07g21490R	1432	356	395	21	19	0.337968	0.819457	0.2252	FALSE
AT4G02590_BraA09g02670R_BraA03g28640R	603	561	202	21	4	0.095778	0.947201	0.0467	FALSE
AT4G14540_BraA03g36770R_BraA05g29690R	848	405	327	12	9	0.562295	0.701865	0.3874	FALSE
AT4G26640_BraA01g10230R_BraA08g19670R	35	240	597	0	0	1	1	< 1.00E-04	FALSE
AT5G02030_BraA10g31790R_BraA03g01450R	183	428	43	7	0	0.685801	0.985222	< 1.00E-04	FALSE
AT5G08190_BraA10g27280R_BraA03g04230R	86	154	167	0	0	1	1	< 1.00E-04	FALSE
AT5G08330_BraA03g04320R_BraA10g27160R	556	1480	146	52	1	0.0891495	0.989668	0.0057	FALSE
AT5G12840_BraA10g24420R_BraA03g06080R	163	436	191	1	0	0.935906	0.997715	< 1.00E-04	FALSE
AT5G15310_BraA03g07320R_BraA10g22670R	153	942	358	9	0	0.137605	0.994938	< 1.00E-04	FALSE
AT5G15830_BraA10g22300R_BraA03g07580R	37	70	38	0	0	1	1	< 1.00E-04	FALSE
AT5G17300_BraA10g21270R_BraA03g08240R	379	1781	814	82	7	8.0893e-08	1	< 1.00E-04	TRUE
AT5G24470_BraA06g29990R_BraA09g06770R	473	1275	1186	55	30	7.47155e-05	0.975617	< 1.00E-04	TRUE
AT5G56860_BraA10g14020R_BraA03g12750R	1085	734	712	60	37	0.00306594	0.980727	0.0023	TRUE
AT5G59780_BraA10g16680R_BraA03g11230R	379	254	680	6	7	0.124245	0.933266	0.0591	FALSE
AT5G60200_BraA10g17000R_BraA03g11020R	147	89	18	0	0	1	1	< 1.00E-04	FALSE
AT5G60850_BraA09g07400R_BraA03g42930R	356	585	663	3	3	0.744052	0.834382	0.2878	FALSE
AT5G61420_BraA03g42560R_BraA09g07610R	113	871	421	0	0	1	1	< 1.00E-04	FALSE
AT5G62000_BraA06g24020R_BraA09g07780R	470	340	644	12	12	0.0462249	0.880263	0.0261	TRUE
AT5G62470_BraA09g07970R_BraA06g24510R	242	787	416	7	1	0.287452	0.978546	0.0336	FALSE
AT5G65210_BraA06g26940R_BraA09g09310R	329	240	162	0	0	1	1	< 1.00E-04	FALSE
AT5G65410_BraA09g09390R_BraA06g27140R	381	66	478	4	26	0.647719	0.780541	0.3037	FALSE
AT5G67420_BraA09g09700R_BraA07g15350R	44	1040	813	2	1	0.719802	0.948591	0.183	FALSE
AT1G06040_BraA10g05180R_BraA08g33580R	512	1248	1084	72	64	0.0010333	0.00619705	0.0897	FALSE
AT1G14685_BraA08g29490R_BraA06g10670R	280	640	416	16	7	0.0665638	0.870222	0.0293	FALSE
AT1G28050_BraA07g11510R_BraA09g35070R	282	1542	1029	38	17	0.000377973	0.880209	< 1.00E-04	TRUE
AT1G29160_BraA09g34270R_BraA07g07120R	379	9	61	0	0	1	1	< 1.00E-04	FALSE
AT1G35460_BraA05g21180R_BraA09g29190R	109	287	29	2	0	0.978543	0.99824	< 1.00E-04	FALSE
AT1G69690_BraA07g33010R_BraA02g20350R	68	236	81	1	0	0.954322	0.997966	< 1.00E-04	FALSE
AT1G69780_BraA07g33440R_BraA02g20430R	206	125	151	1	0	0.819117	0.999048	< 1.00E-04	FALSE
AT1G78080_BraA02g25440R_BraA07g39200R	647	525	413	11	3	0.121734	0.987679	0.0211	FALSE
AT1G79430_BraA07g40160R_BraA02g26260R	1293	471	947	22	38	0.257952	0.32829	0.4098	FALSE
AT2G02070_BraA06g38000R_BraA02g36240R	455	781	866	28	12	0.000458301	0.998662	0.0001	TRUE
AT2G03340_BraA06g37470R_BraA02g36920R	43	1104	296	0	0	1	1	< 1.00E-04	FALSE
AT2G18300_BraA06g28190R_BraA07g03150R	520	709	1208	68	66	2.17635e-09	0.240907	< 1.00E-04	TRUE
AT2G30590_BraA03g16090R_BraA05g14010R	1178	662	258	25	6	0.244191	0.934492	0.0903	FALSE
AT2G35940_BraA03g18560R_BraA05g09730R	345	683	859	10	12	0.530048	0.56078	0.4344	FALSE
AT2G38090_BraA05g07970R_BraA03g19670R	1032	710	582	30	10	0.000404719	0.996748	0.0001	TRUE
AT2G40080_BraA03g20890R_BraA05g06590R	158	1341	706	23	11	0.277982	0.688047	0.2131	FALSE
AT2G41940_BraA05g03460R_BraA03g21760R	426	380	110	0	0	1	1	< 1.00E-04	FALSE
AT2G44940_BraA03g23010R_BraA05g05520R	1159	51	16	1	0	0.961694	0.998135	< 1.00E-04	FALSE
AT2G46870_BraA05g01920R_BraA03g23730R	110	122	81	0	0	1	1	< 1.00E-04	FALSE
AT3G02830_BraA01g35590R_BraA05g39760R	499	1086	1352	73	73	7.88554e-07	0.00200582	0.0001	TRUE
AT3G13810_BraA01g30640R_BraA05g31580R	651	974	840	48	15	0.000288644	0.999963	0.0002	TRUE
AT3G14230_BraA05g31160R_BraA01g30290R	80	161	361	1	0	0.751641	0.999854	< 1.00E-04	FALSE
AT3G15030_BraA05g30520R_BraA01g29340R	363	1253	1407	18	11	0.0527139	0.966627	0.0277	FALSE
AT3G16770_BraA05g29040R_BraA01g28100R	143	682	809	0	0	1	1	< 1.00E-04	FALSE
AT3G17609_BraA05g28490R_BraA01g27380R	648	1800	1352	95	62	5.62184e-09	0.155119	< 1.00E-04	TRUE
AT3G19580_BraA05g26300R_BraA01g26010R	158	55	104	0	0	1	1	< 1.00E-04	FALSE
AT3G22380_BraA05g23420R_BraA01g24090R	556	1698	1357	54	43	0.00146929	0.0495722	0.0099	TRUE
AT3G26744_BraA06g36240R_BraA02g38130R	322	1386	1161	28	19	0.126949	0.734787	0.0955	FALSE
AT3G28910_BraA06g34680R_BraA02g39290R	1189	780	633	42	23	0.0358422	0.949439	0.0247	TRUE
AT3G54810_BraA04g05880R_BraA09g43790R	411	1052	502	7	2	0.526447	0.916541	0.1514	FALSE
AT3G56400_BraA04g04660R_BraA09g45260R	358	644	902	14	13	0.0389357	0.578856	0.0174	TRUE
AT3G57800_BraA04g03700R_BraA09g46490R	1432	289	356	27	21	0.0306833	0.940582	0.0184	TRUE
AT4G14540_BraA05g29690R_BraA01g28640R	848	327	733	9	19	0.586267	0.650566	0.4178	FALSE
AT4G26640_BraA01g10230R_BraA03g52290R	35	240	63	0	0	1	1	< 1.00E-04	FALSE
AT4G29190_BraA01g01030R_BraA03g54010R	498	968	637	45	27	0.0644807	0.561349	0.0632	FALSE
AT5G02030_BraA10g31790R_BraA02g01440R	183	428	542	7	0	0.0138398	0.9999	< 1.00E-04	TRUE
AT5G05410_BraA10g29320R_BraA02g02680R	398	349	1021	6	15	0.541145	0.622713	0.3909	FALSE
AT5G12840_BraA10g24420R_BraA02g05520R	163	436	48	1	0	0.998853	0.999894	< 1.00E-04	FALSE
AT5G15160_BraA02g06880R_BraA10g22850R	198	474	577	1	0	0.816212	0.999097	< 1.00E-04	FALSE
AT5G15310_BraA02g06970R_BraA10g22670R	153	579	358	1	0	0.899198	0.997766	< 1.00E-04	FALSE
AT5G15830_BraA10g22300R_BraA02g07220R	37	70	208	0	0	1	1	< 1.00E-04	FALSE
AT5G17300_BraA10g21270R_BraA02g07990R	379	1781	968	82	36	9.78602e-07	0.71534	< 1.00E-04	TRUE
AT5G24470_BraA02g43100R_BraA06g29990R	473	1409	1275	59	55	0.0369232	0.0422463	0.4555	FALSE
AT5G56860_BraA10g14020R_BraA02g13720R	1085	734	256	60	10	0.0140101	0.99502	0.0052	TRUE
AT5G59780_BraA02g11720R_BraA10g16680R	379	164	254	4	6	0.729131	0.760791	0.3452	FALSE
AT5G60200_BraA10g17000R_BraA02g11440R	147	89	33	0	0	1	1	< 1.00E-04	FALSE
AT5G60850_BraA03g42930R_BraA02g43710R	356	663	492	3	2	0.785371	0.845652	0.2961	FALSE
AT5G61420_BraA02g44060R_BraA03g42560R	113	637	871	1	0	0.803369	0.999304	< 1.00E-04	FALSE
AT5G62000_BraA06g24020R_BraA02g44200R	470	340	881	12	11	0.0121424	0.998554	0.0055	TRUE
AT5G62470_BraA02g44570R_BraA06g24510R	242	1359	416	10	1	0.340872	0.967167	0.0527	FALSE
AT5G65210_BraA02g45900R_BraA06g26940R	329	104	240	1	0	0.74655	0.999882	< 1.00E-04	FALSE
AT5G65410_BraA02g46050R_BraA06g27140R	381	95	478	7	26	0.382138	0.722951	0.2667	FALSE
AT5G67420_BraA07g15350R_BraA02g46320R	44	813	850	1	0	0.833202	0.998798	< 1.00E-04	FALSE

## Sheet: Significant_Groups
Gene order based on target ortholog overlap, where B. rapa 1 is always more A. thaliana-like (A. thaliana _ B. rapa 1 _ B. rapa 2)	Gene order based on target CNS overlap, where B. rapa 1 is always more A. thaliana-like (A. thaliana _ B. rapa 1 _ B. rapa 2)	Significance (P-value) of overlapping targets between A. thaliana and B. rapa 1	B. rapa 1 is significantly more A. thaliana-like than B. rapa 2 (based on target gene ortholog overlap)	Significance (P-value) of overlapping CNSs between A. thaliana and B. rapa 1	B. rapa 1 is significantly more A. thaliana-like than B. rapa 2 (based on target gene CNS overlap)	TF group was used in motif analysis
AT3G17609_BraA05g28490R_BraA01g27380R	AT3G17609_BraA05g28490R_BraA01g27380R	1.10811e-10	TRUE	5.62184e-09	TRUE	TRUE
AT5G24470_BraA02g43100R_BraA09g06770R	AT5G24470_BraA02g43100R_BraA09g06770R	4.98469e-08	TRUE	0.00462572	TRUE	TRUE
AT5G17300_BraA10g21270R_BraA02g07990R	AT5G17300_BraA10g21270R_BraA02g07990R	3.58383e-07	TRUE	9.78602e-07	TRUE	TRUE
AT1G28050_BraA08g23980R_BraA09g35070R	AT1G28050_BraA08g23980R_BraA09g35070R	4.45308e-07	TRUE	2.79239e-05	TRUE	TRUE
AT1G06040_BraA10g05180R_BraA09g63490R	AT1G06040_BraA10g05180R_BraA09g63490R	4.50469e-07	TRUE	0.000253758	TRUE	TRUE
AT5G17300_BraA10g21270R_BraA03g08240R	AT5G17300_BraA10g21270R_BraA03g08240R	9.91082e-07	TRUE	8.0893e-08	TRUE	TRUE
AT5G61380_BraA03g42600R_BraA09g07570R	AT5G61380_BraA03g42600R_BraA09g07570R	1.47591e-06	TRUE	3.03037e-08	TRUE	TRUE
AT2G18300_BraA06g28190R_BraA07g03150R	AT2G18300_BraA06g28190R_BraA07g03150R	3.21121e-05	TRUE	2.17635e-09	TRUE	TRUE
AT1G28050_BraA07g11510R_BraA09g35070R	AT1G28050_BraA07g11510R_BraA09g35070R	5.42883e-05	TRUE	0.000377973	TRUE	TRUE
AT5G62430_BraA02g44540R_BraA06g24450R	AT5G62430_BraA02g44540R_BraA06g24450R	6.25267e-05	TRUE	0.00564536	TRUE	TRUE
AT3G02830_BraA03g30710R_BraA01g35590R	AT3G02830_BraA01g35590R_BraA03g30710R	6.25852e-05	TRUE	0.00062199	TRUE	TRUE
AT1G22070_BraA09g39200R_BraA08g26260R	AT1G22070_BraA09g39200R_BraA08g26260R	0.000129269	TRUE	8.09716e-06	TRUE	TRUE
AT3G02380_BraA03g30460R_BraA01g36000R	AT3G02380_BraA03g30460R_BraA01g36000R	2.12271e-09	TRUE	2.50183e-09	TRUE	FALSE
AT5G24470_BraA02g43100R_BraA06g29990R	AT5G24470_BraA02g43100R_BraA06g29990R	1.74677e-08	TRUE	0.0369232	FALSE	FALSE
AT3G17609_BraA05g28490R_BraA03g37510R	AT3G17609_BraA05g28490R_BraA03g37510R	1.65785e-06	TRUE	2.56095e-05	TRUE	FALSE
AT1G06040_BraA10g05180R_BraA08g33580R	AT1G06040_BraA10g05180R_BraA08g33580R	5.36664e-06	TRUE	0.0010333	FALSE	FALSE
AT5G02810_BraA02g01670R_BraA10g31240R	AT5G02810_BraA10g31240R_BraA02g01670R	8.58059e-06	TRUE	7.45245e-06	FALSE	FALSE
AT3G02830_BraA03g30710R_BraA05g39760R	AT3G02830_BraA05g39760R_BraA03g30710R	1.56457e-05	TRUE	0.0353148	FALSE	FALSE
AT3G58120_BraA09g46690R_BraA07g21700R	AT3G58120_BraA09g46690R_BraA07g21700R	7.627e-05	TRUE	0.000296031	TRUE	FALSE
AT5G24470_BraA06g29990R_BraA09g06770R	AT5G24470_BraA06g29990R_BraA09g06770R	0.000107056	TRUE	7.47155e-05	TRUE	FALSE
AT1G06040_BraA08g33580R_BraA09g63490R	AT1G06040_BraA08g33580R_BraA09g63490R	0.000112278	TRUE	0.0361866	FALSE	FALSE
AT1G28050_BraA08g23980R_BraA07g11510R	AT1G28050_BraA08g23980R_BraA07g11510R	0.000126268	TRUE	0.000665593	TRUE	FALSE
AT2G28200_BraA04g19630R_BraA07g17240R	AT2G28200_BraA04g19630R_BraA07g17240R	0.000148597	TRUE	0.000199372	TRUE	FALSE
AT1G09570_BraA06g06770R_BraA09g61890R	AT1G09570_BraA06g06770R_BraA09g61890R	0.000168509	TRUE	4.20895e-06	TRUE	FALSE
AT5G44190_BraA06g41080R_BraA02g31960R	AT5G44190_BraA06g41080R_BraA02g31960R	0.000194749	TRUE	0.0165909	TRUE	FALSE
AT5G17300_BraA02g07990R_BraA03g08240R	AT5G17300_BraA02g07990R_BraA03g08240R	0.000405011	TRUE	1.03511e-05	TRUE	FALSE
AT3G02830_BraA01g35590R_BraA05g39760R	AT3G02830_BraA01g35590R_BraA05g39760R	0.000557212	TRUE	7.88554e-07	TRUE	FALSE
AT5G24590_BraA09g06740R_BraA06g30050R	AT5G24590_BraA09g06740R_BraA06g30050R	0.00172046	TRUE	0.0145034	TRUE	FALSE
AT4G29190_BraA01g01030R_BraA03g54010R	AT4G29190_BraA01g01030R_BraA03g54010R	0.00184536	TRUE	0.0644807	FALSE	FALSE
AT2G40080_BraA03g20890R_BraA04g27180R	AT2G40080_BraA03g20890R_BraA04g27180R	0.00227488	TRUE	0.0116369	TRUE	FALSE
AT3G17609_BraA01g27380R_BraA03g37510R	AT3G17609_BraA03g37510R_BraA01g27380R	0.00278959	TRUE	0.00331502	TRUE	FALSE
AT2G18300_BraA09g12100R_BraA07g03150R	AT2G18300_BraA09g12100R_BraA07g03150R	0.00394185	TRUE	0.00589206	FALSE	FALSE
AT4G17230_BraA01g12300R_BraA08g12330R	AT4G17230_BraA08g12330R_BraA01g12300R	0.00401623	TRUE	0.142714	FALSE	FALSE
AT5G39660_BraA07g18470R_BraA04g12840R	AT5G39660_BraA07g18470R_BraA04g12840R	0.00426342	TRUE	0.0110581	TRUE	FALSE
AT2G18300_BraA06g28190R_BraA09g12100R	AT2G18300_BraA06g28190R_BraA09g12100R	0.00460205	TRUE	3.6235e-07	TRUE	FALSE
AT2G35940_BraA03g18560R_BraA04g24850R	AT2G35940_BraA03g18560R_BraA04g24850R	0.00597892	TRUE	0.0101906	TRUE	FALSE
AT5G24930_BraA06g30460R_BraA09g06670R	AT5G24930_BraA06g30460R_BraA09g06670R	0.00684164	TRUE	0.0154794	TRUE	FALSE
AT2G40080_BraA05g06590R_BraA04g27180R	AT2G40080_BraA05g06590R_BraA04g27180R	0.006955	TRUE	0.0518643	FALSE	FALSE
AT2G02070_BraA06g38000R_BraA09g23350R	AT2G02070_BraA06g38000R_BraA09g23350R	0.0112957	TRUE	0.0209266	TRUE	FALSE
AT2G25930_BraA09g50820R_BraA04g18480R	AT2G25930_BraA04g18480R_BraA09g50820R	0.0114762	TRUE	0.442985	FALSE	FALSE
AT2G46790_BraA04g31570R_BraA05g01960R	AT2G46790_BraA04g31570R_BraA05g01960R	0.0119652	TRUE	0.0239078	TRUE	FALSE
AT1G04400_BraA08g34230R_BraA10g03560R	AT1G04400_BraA08g34230R_BraA10g03560R	0.0137494	TRUE	0.0066305	TRUE	FALSE
AT1G14685_BraA08g29490R_BraA06g10670R	AT1G14685_BraA08g29490R_BraA06g10670R	0.0164738	TRUE	0.0665638	FALSE	FALSE
AT4G14540_BraA05g29690R_BraA01g28640R	AT4G14540_BraA05g29690R_BraA01g28640R	0.0217225	TRUE	0.586267	FALSE	FALSE
AT3G22380_BraA01g24090R_BraA05g23420R	AT3G22380_BraA05g23420R_BraA01g24090R	0.0229966	TRUE	0.00146929	TRUE	FALSE
AT2G02070_BraA06g38000R_BraA02g36240R	AT2G02070_BraA06g38000R_BraA02g36240R	0.0310505	TRUE	0.000458301	TRUE	FALSE
AT1G79430_BraA02g26260R_BraA07g40160R	AT1G79430_BraA07g40160R_BraA02g26260R	0.040933	TRUE	0.257952	FALSE	FALSE
AT1G78080_BraA07g25230R_BraA07g39200R	AT1G78080_BraA07g25230R_BraA07g39200R	0.042052	TRUE	6.51303e-05	TRUE	FALSE
AT1G79430_BraA02g26260R_BraA07g24740R	AT1G79430_BraA02g26260R_BraA07g24740R	0.0439656	TRUE	0.368816	FALSE	FALSE
AT1G33240_BraA08g08750R_BraA09g30680R	AT1G33240_BraA08g08750R_BraA09g30680R	0.0462199	FALSE	0.000306929	TRUE	FALSE
AT5G56860_BraA10g14020R_BraA03g12750R	AT5G56860_BraA10g14020R_BraA03g12750R	0.0543786	FALSE	0.00306594	TRUE	FALSE
AT2G35940_BraA05g09730R_BraA04g24850R	AT2G35940_BraA05g09730R_BraA04g24850R	0.0578667	FALSE	0.0107229	TRUE	FALSE
AT2G34710_BraA04g24030R_BraA05g10530R	AT2G34710_BraA04g24030R_BraA05g10530R	0.0702346	FALSE	0.0113195	TRUE	FALSE
AT3G57800_BraA04g03700R_BraA07g21490R	AT3G57800_BraA04g03700R_BraA07g21490R	0.105106	FALSE	0.0175608	TRUE	FALSE
AT3G15030_BraA05g30520R_BraA03g36300R	AT3G15030_BraA05g30520R_BraA03g36300R	0.113554	FALSE	0.00065833	TRUE	FALSE
AT3G28910_BraA06g34680R_BraA02g39290R	AT3G28910_BraA06g34680R_BraA02g39290R	0.114993	FALSE	0.0358422	TRUE	FALSE
AT3G22380_BraA03g39640R_BraA05g23420R	AT3G22380_BraA05g23420R_BraA03g39640R	0.125855	FALSE	0.0208617	TRUE	FALSE
AT2G23760_BraA09g52010R_BraA04g16800R	AT2G23760_BraA09g52010R_BraA04g16800R	0.131502	FALSE	0.0189233	TRUE	FALSE
AT2G41940_BraA05g03460R_BraA04g28820R	AT2G41940_BraA04g28820R_BraA05g03460R	0.135755	FALSE	0.0256439	TRUE	FALSE
AT1G19220_BraA06g14510R_BraA08g27590R	AT1G19220_BraA06g14510R_BraA08g27590R	0.144674	FALSE	0.00130993	TRUE	FALSE
AT1G14685_BraA08g29490R_BraA09g58920R	AT1G14685_BraA08g29490R_BraA09g58920R	0.149489	FALSE	0.0231599	TRUE	FALSE
AT1G19850_BraA06g15050R_BraA07g15080R	AT1G19850_BraA06g15050R_BraA07g15080R	0.170402	FALSE	0.000198306	TRUE	FALSE
AT2G38090_BraA05g07970R_BraA03g19670R	AT2G38090_BraA05g07970R_BraA03g19670R	0.171617	FALSE	0.000404719	TRUE	FALSE
AT2G40140_BraA05g06490R_BraA03g20960R	AT2G40140_BraA03g20960R_BraA05g06490R	0.17968	FALSE	0.0145908	TRUE	FALSE
AT5G62000_BraA06g24020R_BraA02g44200R	AT5G62000_BraA06g24020R_BraA02g44200R	0.206056	FALSE	0.0121424	TRUE	FALSE
AT3G06590_BraA01g33920R_BraA05g35890R	AT3G06590_BraA05g35890R_BraA01g33920R	0.215415	FALSE	0.00755607	TRUE	FALSE
AT4G24020_BraA03g50660R_BraA01g07720R	AT4G24020_BraA03g50660R_BraA01g07720R	0.222777	FALSE	0.000564342	TRUE	FALSE
AT1G52150_BraA08g02960R_BraA06g02620R	AT1G52150_BraA08g02960R_BraA06g02620R	0.225807	FALSE	0.00629582	TRUE	FALSE
AT1G78080_BraA07g25230R_BraA02g25440R	AT1G78080_BraA07g25230R_BraA02g25440R	0.22895	FALSE	0.00342617	TRUE	FALSE
AT1G78600_BraA02g25770R_BraA07g25060R	AT1G78600_BraA02g25770R_BraA07g25060R	0.247107	FALSE	0.00140811	TRUE	FALSE
AT3G56400_BraA04g04660R_BraA09g45260R	AT3G56400_BraA04g04660R_BraA09g45260R	0.320136	FALSE	0.0389357	TRUE	FALSE
AT3G57800_BraA04g03700R_BraA09g46490R	AT3G57800_BraA04g03700R_BraA09g46490R	0.325346	FALSE	0.0306833	TRUE	FALSE
AT3G10760_BraA01g32720R_BraA05g34320R	AT3G10760_BraA01g32720R_BraA05g34320R	0.354995	FALSE	0.00501399	TRUE	FALSE
AT3G18990_BraA01g26350R_BraA03g38100R	AT3G18990_BraA03g38100R_BraA01g26350R	0.386292	FALSE	0.000138337	TRUE	FALSE
AT5G02030_BraA10g31790R_BraA02g01440R	AT5G02030_BraA10g31790R_BraA02g01440R	0.387082	FALSE	0.0138398	TRUE	FALSE
AT3G13810_BraA01g30640R_BraA03g35710R	AT3G13810_BraA01g30640R_BraA03g35710R	0.423923	FALSE	0.00407291	TRUE	FALSE
AT5G62000_BraA09g07780R_BraA06g24020R	AT5G62000_BraA06g24020R_BraA09g07780R	0.428632	FALSE	0.0462249	TRUE	FALSE
AT4G00730_BraA09g01470R_BraA03g29610R	AT4G00730_BraA09g01470R_BraA03g29610R	0.439061	FALSE	0.00255797	TRUE	FALSE
AT5G56860_BraA02g13720R_BraA10g14020R	AT5G56860_BraA10g14020R_BraA02g13720R	0.458931	FALSE	0.0140101	TRUE	FALSE
AT3G13810_BraA05g31580R_BraA01g30640R	AT3G13810_BraA01g30640R_BraA05g31580R	0.49462	FALSE	0.000288644	TRUE	FALSE
AT4G17810_BraA01g02140R_BraA03g46960R	AT4G17810_BraA01g02140R_BraA03g46960R	0.52901	FALSE	0.00788196	TRUE	FALSE
AT1G68520_BraA02g19290R_BraA07g29080R	AT1G68520_BraA02g19290R_BraA07g29080R	0.715471	FALSE	0.0379981	TRUE	FALSE
