# Supplementary figures and images for: Expansion of the circadian transcriptome in Brassica rapa and genome-wide diversification of paralog expression patterns
Source: eLife journal article supplement (doi:10.7554/elife.58993), 2020-09-30

# LD vs HC Phase Difference

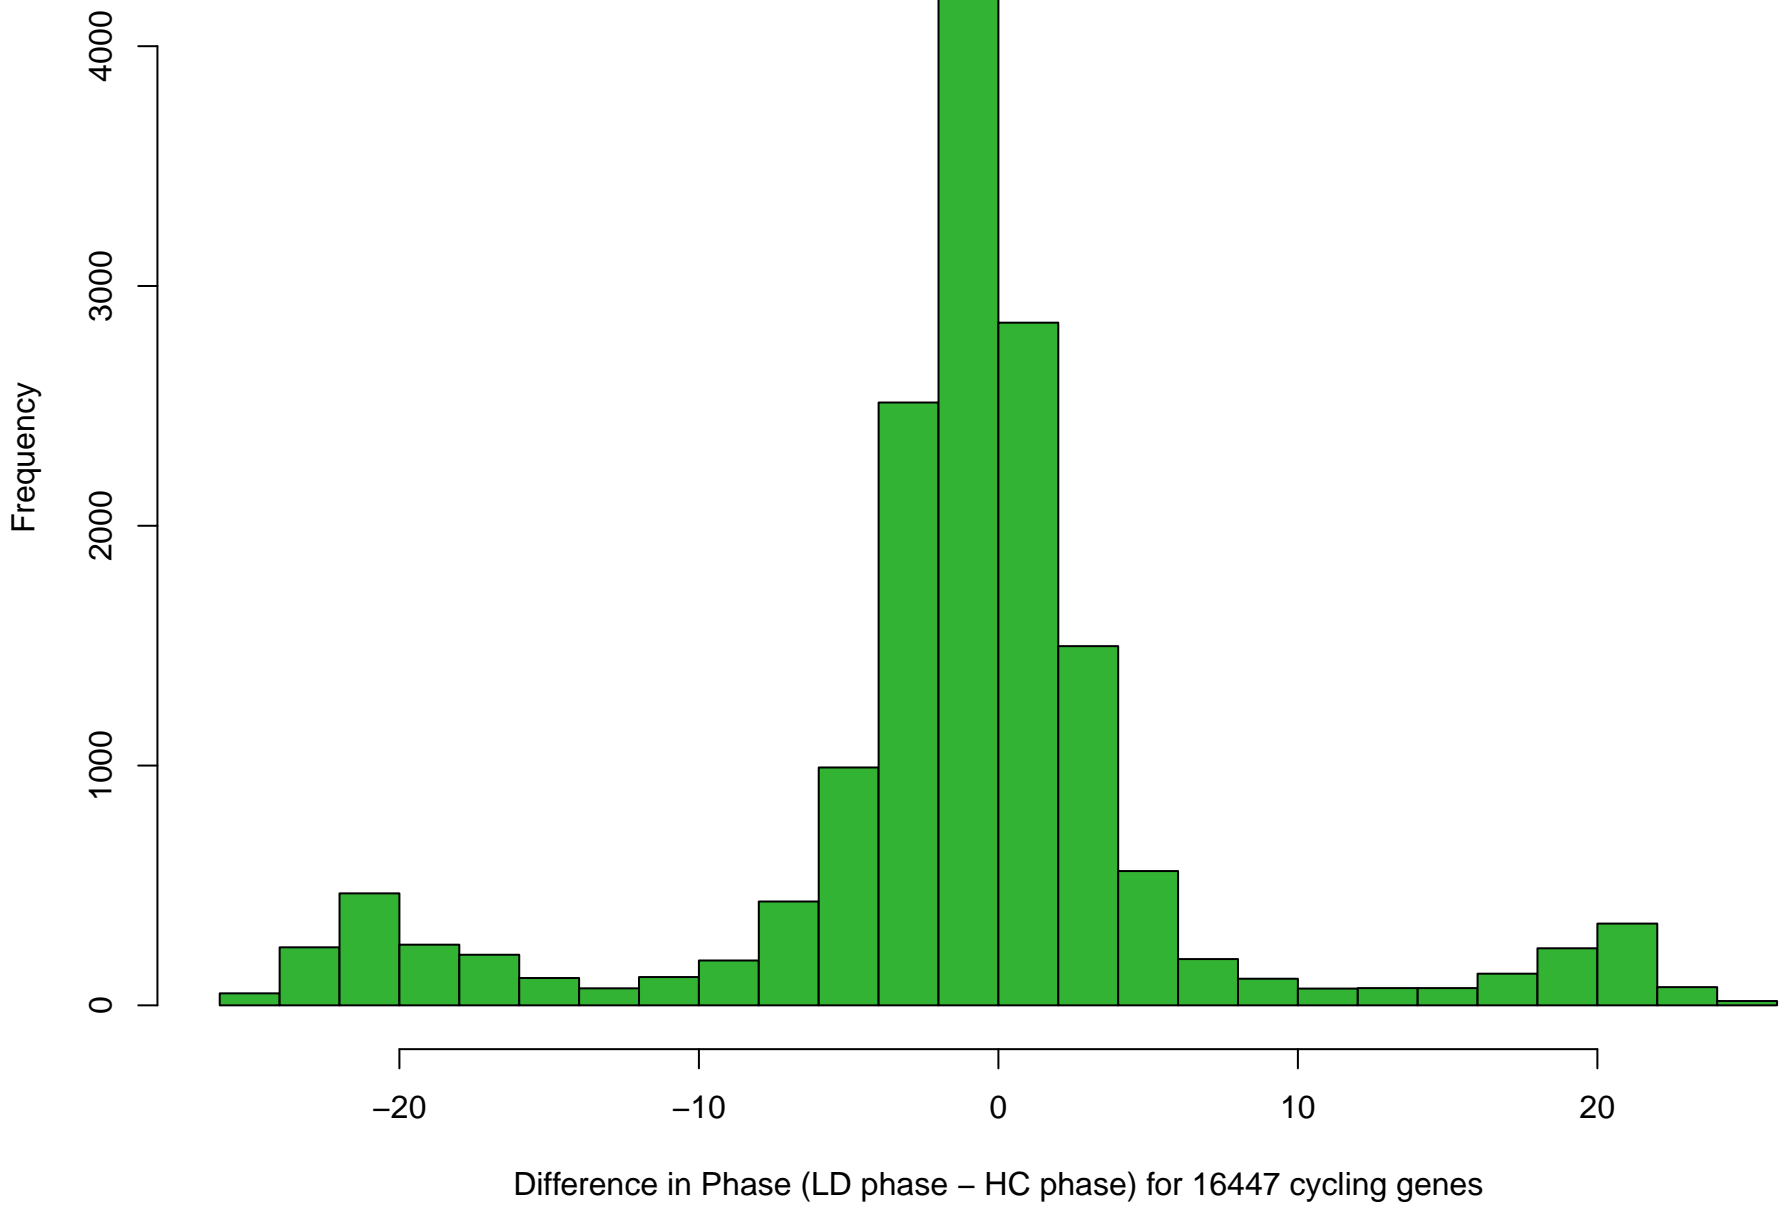

Supplement: supp [file elife_poa_e58993_Figure_1_figure_supplement_1.pdf › elife_poa_e58993_Figure_1_figure_supplement_1.pdf]

Paralog 1

Paralog 2

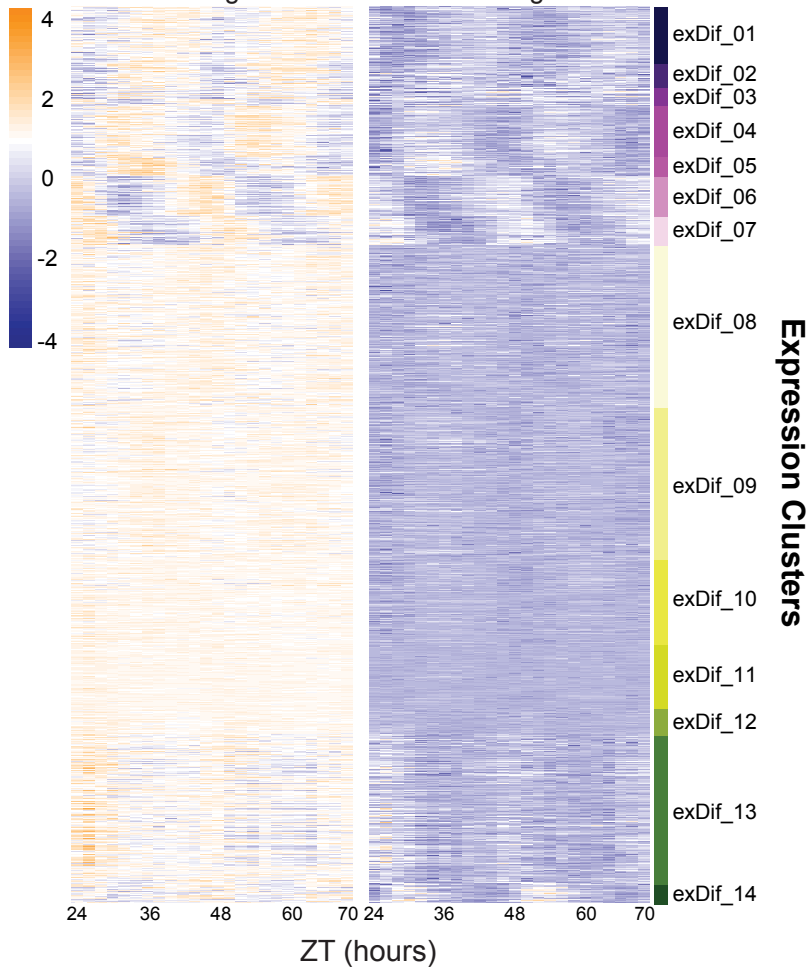

Supplement: supp [file elife_poa_e58993_Figure_3_figure_supplement_1.pdf › elife_poa_e58993_Figure_3_figure_supplement_1.pdf]

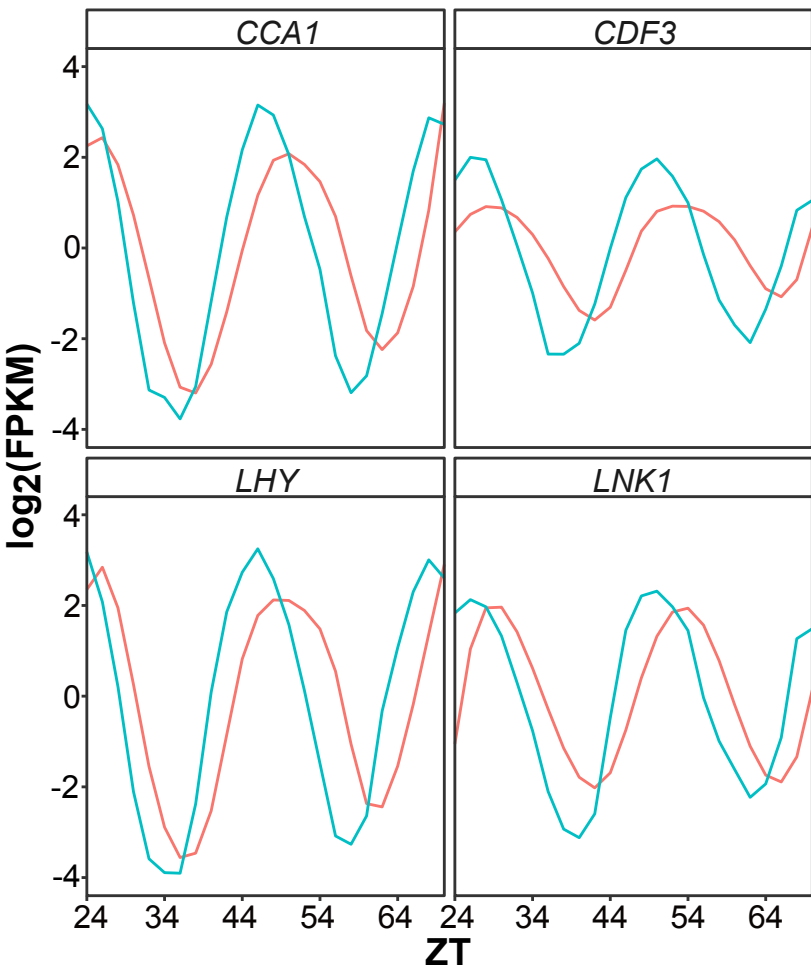

Supplement: supp [file elife_poa_e58993_Figure_4_figure_supplement_1.pdf › elife_poa_e58993_Figure_4_figure_supplement_1.pdf]

A

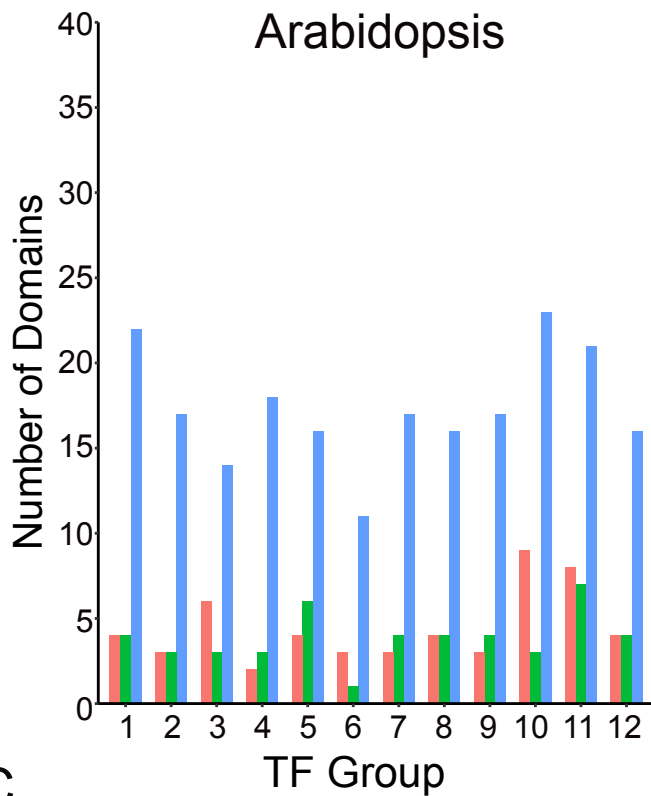

B

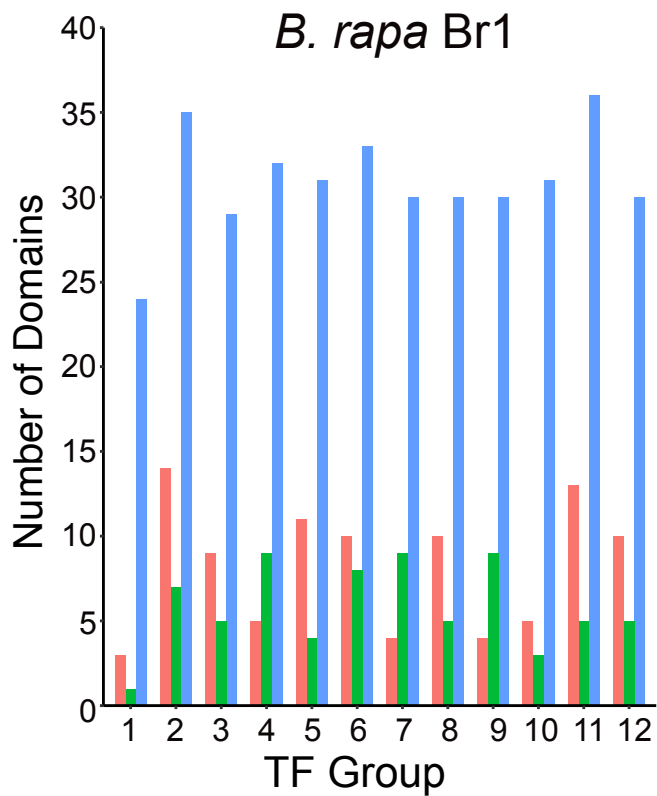

C

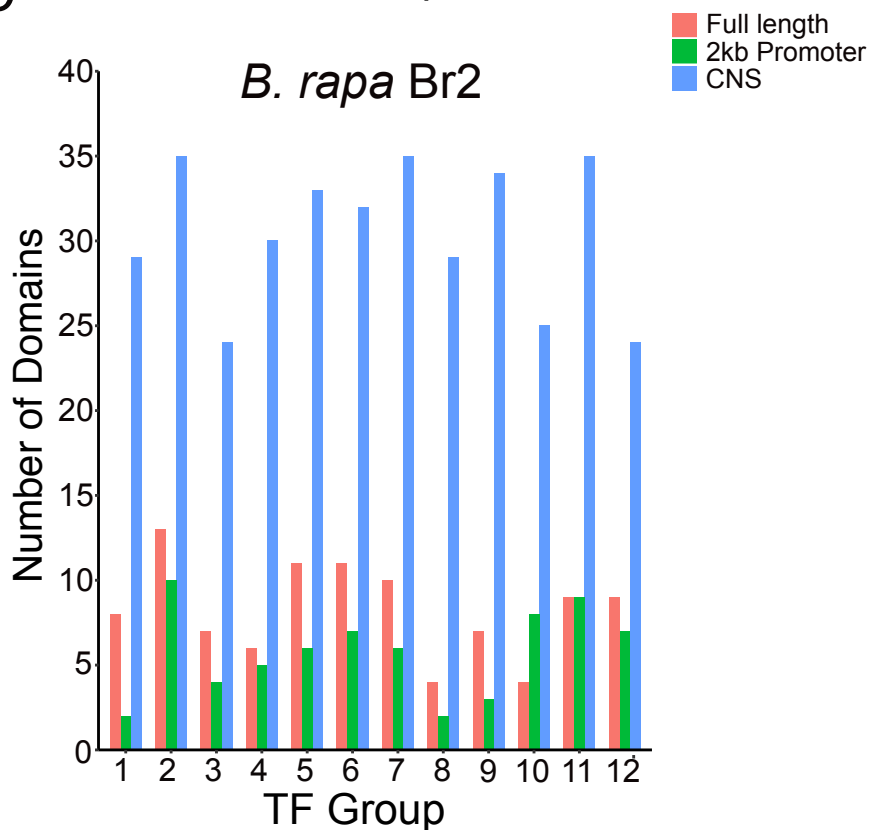

Supplement: supp [file elife_poa_e58993_Figure_4_figure_supplement_2.pdf › elife_poa_e58993_Figure_4_figure_supplement_2.pdf]
